# Supplementary material for: PROFIT, a PROspective, randomised placebo controlled feasibility trial of Faecal mIcrobiota Transplantation in cirrhosis: study protocol for a single-blinded trial
Source: PubMed Central journal article supplement (PMC6398649; doi:10.1136/bmjopen-2018-023518), 2019-02-15
Supplement: bmjopen-2018-023518.draft_revisions.pdf [file bmjopen-2018-023518.draft_revisions.pdf]

# BMJ Open

BMJ Open is committed to open peer review. As part of this commitment we make the peer review history of every article we publish publicly available.

When an article is published we post the peer reviewers' comments and the authors' responses online. We also post the versions of the paper that were used during peer review. These are the versions that the peer review comments apply to.

The versions of the paper that follow are the versions that were submitted during the peer review process. They are not the versions of record or the final published versions. They should not be cited or distributed as the published version of this manuscript.

BMJ Open is an open access journal and the full, final, typeset and author-corrected version of record of the manuscript is available on our site with no access controls, subscription charges or pay-per-view fees (<http://bmjopen.bmj.com>).

If you have any questions on BMJ Open's open peer review process please email [info.bmjopen@bmj.com](mailto:info.bmjopen@bmj.com)

# BMJ Open

## PROFIT: A PROspective, randomised placebo controlled feasibility trial of Faecal mIcrobiota Transplantation in cirrhosis

|                               |                                                                                                                                                                                                                                                                                                                                                                                                                                                                                                                                                                                                                                                                                                                                                                                                                                                         |
|-------------------------------|---------------------------------------------------------------------------------------------------------------------------------------------------------------------------------------------------------------------------------------------------------------------------------------------------------------------------------------------------------------------------------------------------------------------------------------------------------------------------------------------------------------------------------------------------------------------------------------------------------------------------------------------------------------------------------------------------------------------------------------------------------------------------------------------------------------------------------------------------------|
| Journal:                      | <i>BMJ Open</i>                                                                                                                                                                                                                                                                                                                                                                                                                                                                                                                                                                                                                                                                                                                                                                                                                                         |
| Manuscript ID                 | bmjopen-2018-023518                                                                                                                                                                                                                                                                                                                                                                                                                                                                                                                                                                                                                                                                                                                                                                                                                                     |
| Article Type:                 | Protocol                                                                                                                                                                                                                                                                                                                                                                                                                                                                                                                                                                                                                                                                                                                                                                                                                                                |
| Date Submitted by the Author: | 05-May-2018                                                                                                                                                                                                                                                                                                                                                                                                                                                                                                                                                                                                                                                                                                                                                                                                                                             |
| Complete List of Authors:     | Woodhouse, Charlotte; King's College London, Hepatology<br>Patel, Vishal; Kings College London, Hepatology<br>Goldenberg, Simon; Guy's & St. Thomas' NHS Foundation Trust and King's College,<br>Sanchez Fueyo, Alberto; Kings College London, Hepatology<br>China, Louise; UCL, Division of Medicine<br>O'Brien, Alastair; UCL, Division of Medicine<br>Flach, Clare; 1. School of Population Health & Environmental Sciences, Faculty of Life Sciences & Medicine, King's College London<br>Douiri, Abdel; 1. School of Population Health & Environmental Sciences, Faculty of Life Sciences & Medicine, King's College London<br>Shawcross, Debbie ; Kings College London, Liver Sciences, 1st Floor JBC, School of Immunology & Microbial Sciences Faculty of Life Sciences & Medicine, King's College London, Denmark Hill Campus, London, SE5 9RS |
| Keywords:                     | cirrhosis, faecal microbiota transplantation, gut microbiota, feasibility                                                                                                                                                                                                                                                                                                                                                                                                                                                                                                                                                                                                                                                                                                                                                                               |
|                               |                                                                                                                                                                                                                                                                                                                                                                                                                                                                                                                                                                                                                                                                                                                                                                                                                                                         |

SCHOLARONE™  
Manuscripts

1  
2  
3 **PROFIT: A PROspective, randomised placebo controlled feasibility trial of Faecal**  
4 **mIcrobiota Transplantation in cirrhosis**  
5

6  
7 **C. Woodhouse<sup>1</sup>, V. Patel<sup>1</sup>, S. Goldenberg<sup>2</sup>, A. Sanchez-Fueyo<sup>1</sup>, L. China<sup>3</sup>, A. O'Brien<sup>3</sup>, C.**  
8 **Flach<sup>4</sup>, A. Douiri<sup>4</sup>, D. Shawcross<sup>1</sup>**  
9

- 10  
11 **1. Liver Sciences, 1<sup>st</sup> Floor JBC, School of Immunology & Microbial Sciences**  
12 **Faculty of Life Sciences & Medicine, King's College London, Denmark Hill Campus,**  
13 **London, SE5 9RS**  
14 **2. Directorate of Infection, Guy's and St Thomas' NHS Foundation Trust, London**  
15 **3. Division of Medicine, University College London (UCL), London**  
16 **4. School of Population Health & Environmental Sciences, Faculty of Life Sciences &**  
17 **Medicine, King's College London**  
18  
19  
20

21 **Corresponding author: Dr Charlotte Woodhouse, Liver Sciences, 1<sup>st</sup> Floor JBC, School of**  
22 **Immunology & Microbial Sciences, Faculty of Life Sciences & Medicine, King's College**  
23 **London, Denmark Hill Campus SE5 9RS [charlottewoodhouse@nhs.net](mailto:charlottewoodhouse@nhs.net) Tel 02032993713**  
24 **Fax: 020232993899**  
25

26  
27  
28 **Abstract**  
29

30 **Introduction**  
31

32 Patients with advanced cirrhosis have enteric bacterial dysbiosis and translocation of  
33 bacteria and their products across the gut epithelial barrier. This culminates in systemic  
34 inflammation and endotoxemia, inducing innate immune dysfunction which predisposes to  
35 infection, and development of complications such as bleeding, sepsis and hepatic  
36 encephalopathy. This feasibility study aims to assess the safety of administering faecal  
37 microbiota transplant to patients with cirrhosis and explore the effect of the intervention on  
38 their prognosis by achieving restoration of a healthy gut microbiome.  
39  
40

41  
42 **Methods and Analysis**  
43

44 PROFIT is a single centre, randomized, single-blinded, placebo-controlled study evaluating  
45 Faecal Microbiota Transplantation (FMT) against placebo. Patients with advanced but stable  
46 cirrhosis with a MELD score between 10 and 16 will be recruited. Twenty-four patients will  
47 be randomized to FMT plus standard of care (as per our institutional practice) and eight  
48 patients to placebo in a ratio of 3:1. The patients will be assessed in the Clinical Research  
49 Facility at King's College Hospital and the FMT/placebo will be administered in the  
50 endoscopy department within 5 days of recruitment and within 24 hours of randomisation.  
51 Patients will be evaluated at baseline before the study intervention is administered and at 7,  
52 30 and 90 days post intervention.  
53  
54  
55  
56  
57  
58  
59  
60

## Ethics and dissemination

Research Ethics approval was given by the London South East Research Ethics committee (ref 17/LO/2081)

## Results

Will be disseminated via peer reviewed journals and international conferences. The recruitment of the first patient will occur on or shortly after 16/04/2018.

## Trial Registration number

The study has been registered with *ClinicalTrials.gov* as part of the ethics application and approval process – reference number: NCT02862249. The trial is registered with the European Medicines Agency (EudraCT 2017-003629-13) and has been adopted by the NIHR (IRAS 197237). This manuscript refers to the version 2.0 of the protocol; pre-results.

## Strengths and limitations of this study

- This study will demonstrate the feasibility and safety of administering FMT to these patients, however it is not statistically powered to assess for clinically relevant outcomes.
- This is the first study examining the effect of FMT delivered directly into the small bowel in patients with advanced cirrhosis. This RCT does not involve antibiotic pre-treatment in the FMT group, as has been undertaken in the USA in patients with HE.
- This study will provide preliminary data for the development of a further clinical trial to assess the clinical benefit of FMT in advanced cirrhosis.
- One further limitation of the study is its single-blinded design, which was necessary as the FMT and placebo (saline with glycerol) are not matched.

## Introduction

Patients with advanced cirrhosis have enteric dysbiosis with small bowel bacterial overgrowth and translocation of bacteria and their products across the gut epithelial barrier (1). This culminates in systemic inflammation and endotoxaemia, inducing innate immune dysfunction which predisposes to infection (2), and development of complications such as bleeding, sepsis and hepatic encephalopathy (3). It also plays a key role in the natural history of cirrhosis by influencing the rate of progression to advanced liver disease and terminal liver failure (4).

Utilising quantitative metagenomics our group has found 75,245 genes differentially expressed between patients with cirrhosis and healthy individuals. Over 50% of these bacterial species are of buccal origin suggesting an invasion of the gut from the mouth in cirrhosis (5). Patients with cirrhosis also have salivary dysbiosis associated with impaired salivary defenses and systemic inflammation. Salivary dysbiosis has been shown to be greater in patients with cirrhosis who developed complications necessitating hospitalisation within 90 days. Modulating the gut microbiota in patients with cirrhosis with the non-

1  
2  
3 absorbable antibiotic rifaximin has been associated with improved cognitive performance  
4 and reduction in endotoxaemia in patients with cirrhosis (6, 7). Moreover, we have recently  
5 performed a multi-centre retrospective study including 170 patients in which rifaximin- $\alpha$   
6 therapy given for 90 days significantly (i) reduced hospital re-admission rates after 3 months  
7 treatment, impacting significantly on the NHS resource burden and (ii) reduced overall liver  
8 disease severity (as measured by the Child Pugh and Model for End Stage Liver Disease  
9 scores) raising the possibility that modulation of gut microbiota may significantly modify the  
10 natural history of chronic liver failure (8).  
11

12  
13 These data constitute in our view “proof of principle” that modifying the gut microbiota in  
14 patients with cirrhosis improves clinical outcomes. Rifaximin- $\alpha$  was approved by NICE for  
15 the prevention of the recurrence of overt hepatic encephalopathy in cirrhosis (9) but  
16 considerable concern remains regarding whether long term antibiotic prescription will result  
17 in a change in bacterial function and virulence rather than a simple reduction in bacterial  
18 population and whether this may drive bacterial resistance to antibiotics in an already  
19 functionally immunocompromised population. The question was therefore raised as to  
20 whether directly, as opposed to indirectly modulating the gut microbiota utilising faeces  
21 from healthy donors may be a safer and more durable therapy. Faecal microbiota  
22 transplantation (FMT) is a well-established treatment to stably modify the gut microbiome  
23 and has been shown to be safe and efficacious in several disease states resulting from gut  
24 dysbiosis including *Clostridium difficile* infection (10) and inflammatory bowel disease (11).  
25  
26  
27

28 We hypothesise that in patients with advanced cirrhosis, FMT may reduce the progression  
29 to chronic liver failure including the development of jaundice, ascites, bleeding,  
30 encephalopathy, infection and organ dysfunction. Whether FMT is feasible in the setting of  
31 cirrhosis remains to be investigated. We propose conducting a feasibility trial to determine  
32 whether FMT from a healthy donor will alleviate gut dysbiosis and immune dysfunction in  
33 advanced cirrhosis.  
34  
35  
36

## 37 **Methods and Analysis**

### 38 **Primary Objectives:**

39  
40 The primary objective of this study will be to assess whether stabilising gut dysbiosis with  
41 FMT in patients with advanced cirrhosis is both feasible and safe.  
42  
43  
44

### 45 **Primary Endpoints:**

46 The primary endpoints of the study will be twofold. To assess the feasibility of FMT as  
47 determined by the recruitment rates (including acceptability of the intervention) and  
48 tolerability of FMT e.g. gastro-oesophageal reflux rates. The second primary outcome  
49 measure will be to assess the safety of FMT administration, including the incidence of any  
50 transmissible bacterial or viral infection that is deemed to have been acquired from the  
51 donor including *Clostridium difficile* infection.  
52  
53  
54  
55  
56  
57  
58  
59  
60

## Secondary Objectives:

The secondary objectives of the study are to provide preliminary evidence of efficacy for a larger randomised trial, with the purpose of choosing the optimal primary outcome, and estimating the parameters for sample size calculation. We will also collect blood, stool and urine samples from participants to assess the stability of the transplanted gut microbiome by comparing the percentage composition of the stool microbiota on day 7, 30 and 90 with the donor microbiome. Plasma endotoxin (and endotoxin binding protein), pro- and anti-inflammatory cytokine levels, bacterial DNA quantification and serum procalcitonin will be performed at 7, 30 and 90 days as will changes in faecal biomarkers (calprotectin, lactoferrin and M2-Pyruvate Kinase).

## Trial Design

PROFIT is a single-centre study. Thirty-two patients will be recruited from out-patient clinics at King's College Hospital (KCH) or from suitable inpatients on the wards. The patients will be recruited as per the inclusion and exclusion criteria listed in table 1. Patients will be randomized in a single blinded fashion in a ratio of 3:1 FMT to placebo. Patients will be unaware of the intervention given, but investigators will not be blinded to the treatment intervention.

Table 1- Inclusion and exclusion criteria

### Inclusion Criteria

- 18–75 years
- Confirmed advanced cirrhosis of any aetiology with a MELD (12) score between 10 and 16. The diagnosis of cirrhosis will be based on clinical, radiological, or histological criteria.
- Patients with alcohol-related liver disease must have been abstinent from alcohol for a minimum of 6 weeks.
- Patients must be deemed to have capacity to consent to the study.

### Exclusion Criteria

- Severe or life-threatening food allergy
- Pregnancy or breastfeeding
- Patients treated for active variceal bleeding, infection, bacterial peritonitis, overt hepatic encephalopathy or acute-on-chronic liver failure within the past 14 days.
- Patients who have received antibiotics in the past 14 days.
- Active alcohol consumption of >20 grams/day.
- Has had a previous liver transplant
- Hepatocellular carcinoma outside of the Milan Criteria (13)
- Inflammatory bowel disease
- Coeliac disease
- A history of prior gastrointestinal resection such as gastric bypass
- Patient is not expected to survive the duration of the study (90 days).
- Severe renal impairment (creatinine >150 µmol/L)
- HIV positive
- Immunosuppression e.g. more than two weeks treatment with corticosteroids within 8 weeks of intervention, active treatment with tacrolimus, mycophenylate, azathioprine.

### Patient Population

The study will include all patients aged 18 to 75 years with capacity to consent and a diagnosis of cirrhosis. Patients will have a MELD (12) score of between 10 and 16. The diagnosis of cirrhosis may be based on radiological, clinical or histological parameters. In the case of alcohol related cirrhosis, patients must have been abstinent for a minimum of six weeks. The exclusion criteria are outlined in table 1.

### Consent

All participants will be asked to provide informed consent after having had the opportunity to discuss the trial with the clinician, their family and friends and having read the patient information sheet (PIS- Appendix 1.) Patients who lack capacity will not be enrolled in this study. If patients lose capacity during the trial follow up period, an appropriate legal representative will be consulted and will provide consent to ongoing trial participation after appropriate discussion with the trials team and having read the PIS. If the legal representative does not agree to ongoing trial participation, the subject will be withdrawn from trial follow up.

*Figure 1 Study Flow Chart and Anticipated Recruitment (adapted from the PROFIT protocol)*

## Study Intervention

FMT is prepared in laboratory at St Thomas' Hospital in accordance with the principles of Good Manufacturing Practice (GMP) and under Manufacturing Authorisation for an Investigational Medicinal Product (MIA(IMP)) from the Medicines and Healthcare products Regulatory Agency (MHRA). FMT donors are rigorously screened for blood borne and enteric pathogens prior to donation and undergo questionnaire screening for risk factors at baseline and again at donation to reduce the risk of transmissible infection as outlined in table 2. Stool is processed (diluted and filtered with the addition of glycerol) within 6 hours of donation and stored at -80 degrees Celsius for up to six months (as previously described) (15). Material for FMT has full traceability from donor to recipient and aliquots of donor stool are kept for 30 years to allow further testing in the case of any adverse events. Placebo is a solution of saline with glycerol without faecal matter.

### Blood (serology)

- HIV 1+2 serology
- HTLV I/II Ab
- Hepatitis A IgG (and if positive IgM)
- Hepatitis B surface antigen (HBsAg) and core antibody
- Hepatitis C (HCV Ab)
- Hepatitis E
- Syphilis
- CMV/EBV IgG/M
- *Strongyloides stercoralis* (ELISA)

### Stool

- PCR for gastroenteritis agents (*Campylobacter*, *Salmonella*, *Shigella* and *E. coli* O:157)
- Ova, cysts and parasites by concentration and microscopy x3
- *C. difficile* test
- Norovirus PCR
- Screen for gentamicin and carbapenem resistant Gram negative organisms
- Screen for MRSA
- *Helicobacter pylori* antigen
- *Entamoeba histolytica* PCR

Table 2 blood and stool testing of donor FMT samples



1  
2  
3  
4  
5  
6  
7  
8  
9  
10  
11  
12  
13 Following identification, all patients will attend a screening visit and sign the informed  
14 consent form. If deemed to be eligible they will undergo baseline screening with full clinical  
15 history and examination. Medication history will be recorded. Patients will complete a  
16 dietary questionnaire. Baseline samples of blood, urine, saliva and stool will be obtained. All  
17 patients will subsequently attend for a gastroscopy at which the FMT or placebo will be  
18 administered. This will be performed as per the local Endoscopy Unit Protocol using topical  
19 local anaesthetic spray or midazolam sedation as per patient preference. Patients will first  
20 be asked to take bowel preparation to purge the bowel of its native bacteria. This consists of  
21 two sachets of Moviprep® to be taken two hours apart on the evening prior to gastroscopy.  
22 Patients will be monitored for side effects in the Clinical Research Facility after the  
23 procedure.  
24  
25

### 26 27 **Evaluations during and after treatment**

28  
29 Participants will be reassessed at 7 (+/- 5), 30 (+/-7) and 90 (+/-7) days post intervention.  
30 They will be reviewed in the Clinical Research Facility and undergo physical examination,  
31 review of medications and dietary changes and adverse event monitoring. Samples of blood,  
32 urine, saliva and stool will be taken at these visits also. At the end of the 90 day follow up  
33 period, patients will return to their usual care pathway.  
34  
35

### 36 **Statistical analysis**

#### 37 38 **Sample Size**

39  
40 This feasibility study will evaluate feasibility parameters using 95% Confidence Intervals. The  
41 sample size has been proposed mainly to enable the trial to be conducted within the  
42 allocated budget and with acceptable precision for continuous outcomes. According to the  
43 simulation work by Teare MD et al. (18), even with the relatively small pilot sample size of  
44 20, the planned studies would have at least 80% power to detect the target effect size (for  
45 continuous outcomes) more than 75% of the time. Teare et al. recommend that 60 to 100  
46 subjects are sufficient to estimate an event rate (such as recruitment rates) with acceptable  
47 precision in a feasibility study, while sample sizes between 24 and 50 have been  
48 recommended for the accurate estimation of standard deviations. Therefore, we have  
49 chosen a sample size of 32 patients in this trial to have reliable data on all critical  
50 parameters (including event rates) which can also be utilised when planning a larger  
51 intervention trial. For event rates (e.g. recruitment rates) and particularly in the extreme  
52 case with lower rates e.g. 10%, we estimate a drop of precision by only 5% using our  
53 updated sample size and the minimum recommended by Teare et al. (0.16 for 60 patients vs  
54 0.21 for 32 patients). Figure 2 below illustrates the reduction in precision of different rates  
55  
56  
57  
58  
59

when the sample size increases for binary outcomes. This sample size will also be feasible within the budget and will provide acceptable information for planning a future large clinical trial.

*Figure 2 Confidence interval width around one proportion (P) by sample size (N) from PASS software REF - PASS 15 Power Analysis and Sample Size Software (2017). NCCSS, LLC. Kaysville, Utah, USA, [ncss.com/software/pass](http://ncss.com/software/pass).*

The sample size of 32 patients will undergo randomisation in a 3:1 ratio. This will allow the study to demonstrate feasibility of randomising, yet providing robust evidence with respect to the feasibility of the treatment, and preliminary evidence of efficacy parameters.

The following feasibility criteria have been established:

- 25% of screened patients will consent: 256 patients will allow the estimate of the 2-Sided 95% confidence interval of the proportion of consented patients, where the distance from the observed proportion to the limit is 0.058 units.
- 50% of patients screened will fulfil inclusion/exclusion criteria for the trial: screening 64 patients will allow the estimate of the 2-Sided 95% confidence interval of the proportion of patients eligible, where the distance from the observed proportion to the limit is 0.128 units.
- 80% of randomised patients will complete treatment and follow up: 26 of 32 patients completing will allow the estimate of the 2-Sided 95% confidence interval for a single proportion, where the distance from the observed proportion to the limit is 0.177 units.

Differences between the placebo and treatment group in efficacy binary outcomes, will be estimated along with the two-sided 95% CI. Assuming the proportion with the outcome in the control group is 0.5 our sample size will allow estimation of the half-width of the confidence intervals for different size of differences as indicated below. Differences of 0.4 or higher will be distinguishable from 0.

*Table 3 Half width of confidence intervals for differences in proportions between two groups with given sample size, placebo group  $p=0.5$  (created with PASS software REF - PASS 15 Power Analysis and Sample Size Software (2017). NCCSS, LLC. Kaysville, Utah, USA, [ncss.com/software/pass](http://ncss.com/software/pass).)*

| Difference | 0.1   | 0.2   | 0.3   | 0.4   | 0.5   |
|------------|-------|-------|-------|-------|-------|
| Width      | 0.398 | 0.392 | 0.382 | 0.337 | 0.347 |

The half-width of the 95% CI of the difference in means for continuous outcome will be 0.889 SD.

### Clinical Endpoints

Clinical and safety events will be listed and summarised by intervention group. MELD (12) scores will be calculated by visit and treatment group.

### Data synthesis, analysis and presentation

Feasibility and efficacy outcomes will be summarised using the appropriate descriptive statistics, and 95% Confidence Intervals will be calculated to allow for success and go/no go decisions. Biomarker data will be pre-processed according to the established standards for each platform, and statistical analyses will be performed using non-parametric and permutation based methods which are more appropriate for small sample sizes.

### Statistical Software

Analyses will be performed using R and/or Stata statistical software packages.

### Discussion

The PROFIT study is the first study to look at the use of FMT delivered directly into the small bowel in patients with cirrhosis. Liver transplantation is a highly selective treatment and only those most likely to benefit will be listed. Depending on blood type patients can wait up to 24 months for a liver transplant. There are even fewer options for patients who are unsuitable for transplantation.

Cirrhosis is often complicated by recurrent admissions with sepsis, variceal bleeding, ascites and hepatic encephalopathy. We know that patients with cirrhosis have enteric dysbiosis and altered gut permeability. The non-absorbable antibiotic rifaximin has proved useful in patients with cirrhosis and chronic hepatic encephalopathy, but the long-term benefits of antibiotic use are unknown and the possibility of development of bacterial resistance remains with all antibiotics. The possibility of re-populating the gut of cirrhotic patients with healthy gut microbiota could be a potential alternative, providing a new treatment approach for these vulnerable individuals.

A group in the USA have recently published the results of the impact of FMT delivered via enema in 10 cirrhotic patients, compared with 10 patients receiving standard of care treatment (16). FMT was found to be safe and the patients in the treatment group did not have any admissions for HE, whereas there were six episodes of HE in the standard of care group. Four of these episodes required hospital admission. The FMT group were treated with broad spectrum antibiotics prior to FMT administration, whereas the standard of care group were not, meaning that the effects of FMT cannot be clearly separated from the antibiotic administration. We hope that PROFIT will add to the knowledge base of the use of FMT in cirrhosis and will provide an accurate assessment of the safety of FMT. We plan to treat the FMT and control groups identically, aside from the administration of FMT to accurately assess its impact, without the confounding factor of antibiotic treatment.

A limitation of our study is the single blinded design. This was selected due to the inherent difficulties in preparing a matched placebo, without introducing substances that may upset

1  
2  
3 the delicate gut microbiota. The IMP will be delivered by the trial investigators, so it has not  
4 been possible to blind the clinicians in this study. Patients and the trial Statistician will be  
5 blinded.  
6

7 The study is not powered to detect differences in clinical outcomes, but may provide  
8 evidence for markers relating to clinical outcomes that could be studied in a larger RCT.  
9

### 10 **Sponsor**

11  
12  
13 The PROFIT trial is co-sponsored by King's College Hospital and Kings' College London. The  
14 funding was supplied by an NIHR research grant for patient benefit (PB-PG-0215-36070).  
15

### 16 **Trial Monitoring Groups**

#### 17 **Trial Steering Committee (TSC)**

18  
19 This group will oversee the running of the trial and discuss any issues that may arise  
20 throughout the process of recruitment and follow up of patients. The group will be chaired  
21 by an independent clinician. Investigators will report to the group on a regular basis. The  
22 Data Monitoring Committee (DMC) will inform the TSC if there are any issues raised from its  
23 discussions.  
24  
25  
26  
27  
28

#### 29 **Data Monitoring Committee**

30  
31 This is an entirely independent group that analyzes interim data, to determine whether or  
32 not the trial is safe to continue. It monitors adverse events and adverse reactions and reacts  
33 to any issues and directs the TSC as to whether or not the trial should continue. The DMC  
34 undertakes interim statistical analysis using an independent statistician to ensure the  
35 ongoing safety and integrity of the trial. The members of this committee are independent of  
36 the trial, but will be experienced clinicians with expertise in clinical trials.  
37  
38

#### 39 **Ethics and Dissemination**

40  
41  
42 The ethical permission has been given by the South-East Research Ethics Committee, REC  
43 reference 17/LO/2081, IRAS project ID 197237. EUDRACT number 2017-003629-13.  
44 The results of the trial will be analyzed and published in a peer reviewed journal and  
45 disseminated at international conferences.  
46

#### 47 **Patient and Public Involvement**

48  
49 A lay reviewer/patient representative at the NIHR reviewed the protocol. This was funded  
50 by the Research for Patient Benefit programme. Feedback was taken on board and revisions  
51 were subsequently made.  
52  
53  
54  
55  
56  
57  
58  
59  
60

1  
2  
3 The British Liver Trust, British Society of Gastroenterology Liver Research Group and King's  
4 Liver Outpatient Advisory Group (patient group) were all involved in the study set-up and  
5 protocol development at all stages.  
6

7 Results will be disseminated to study participants via the Liver Research Nurse if they  
8 indicate an interest in the study outcome.  
9

### 10 **Funding statement**

11  
12  
13 This work was supported by the NIHR, grant number PB-PG-0215-36070.  
14

### 15 **Competing Interests Statement**

16  
17  
18 Dr Shawcross has received fees from Norgine and Falk, outside the submitted work. Dr Patel  
19 has received a travel bursary from Norgine outside the submitted work. Dr. Goldenberg  
20 reports grants and personal fees from Astellas, personal fees from MSD, personal fees from  
21 Pfizer, personal fees from Shionogi, outside the submitted work.  
22  
23

### 24 **Acknowledgements**

25  
26  
27 We would like to thank the clinicians involved, King's College Hospital R&D Department, the  
28 NIHR, patient advisers and lay reviewers for their contributions in the set-up of the PROFIT  
29 trial. We would also like to acknowledge Liz Allen, our QP, for her contribution to the MHRA  
30 approval process.  
31  
32

### 33 **Author Contributions**

34  
35  
36 CW and DS wrote the manuscript, with assistance from SG, VP and ASF. AD and CF prepared  
37 the statistical analysis plan. LC and AO'B advised on study analyses and the format of the  
38 protocol for submission. SG provided the expert advice on FMT and has set up the FMT  
39 service at GSTT, which will supply the FMT to the study. All authors reviewed and edited the  
40 manuscript prior to submission.  
41  
42  
43  
44  
45  
46  
47  
48  
49  
50

51 Appendix 1- PIS  
52  
53  
54  
55  
56  
57  
58  
59  
60

1. Wiest R, Garcia-Tsao G. Bacterial translocation (BT) in cirrhosis. *Hepatology*. 2005;41(3):422-33.
2. Jalan R, Fernandez J, Wiest R, Schnabl B, Moreau R, Angeli P, et al. Bacterial infections in cirrhosis: a position statement based on the EASL Special Conference 2013. *J Hepatol*. 2014;60(6):1310-24.
3. Bajaj JS, Heuman D. M., Hylemin P.B. Sanyal A. J., White M. B. <Altered profile of human gut microbiome is associated with cirrhosis and its complications>. *Journal of Hepatology*. 2014;60:940-7
4. Nolan JP. The role of intestinal endotoxin in liver injury: a long and evolving history. *Hepatology*. 2010;52(5):1829-35.
5. Qin N, Yang F, Li A, Prifti E, Chen Y, Shao L, et al. Alterations of the human gut microbiome in liver cirrhosis. *Nature*. 2014;513(7516):59-64.
6. Bajaj JS, Heuman DM, Sanyal AJ, Hylemon PB, Sterling RK, Stravitz RT, et al. Modulation of the metabiome by rifaximin in patients with cirrhosis and minimal hepatic encephalopathy. *PLoS One*. 2013;8(4):e60042.
7. Shawcross DL. Is it time to target gut dysbiosis and immune dysfunction in the therapy of hepatic encephalopathy? *Expert Rev Gastroenterol Hepatol*. 2015;9(5):539-42.
8. Patel V OJ, Sturgeon J, Habtemariam Z, Preedy H, Richardson P, et al. Rifaximin Is Efficacious In The Treatment Of Chronic Overt Hepatic Encephalopathy: A UK Liver Multi-Centre Experience [Abstract]Suppl 1 *Gut* 2014;63.
9. NICE. National Institute for Health and Care Excellence. Rifaximin for the maintenance treatment of hepatic encephalopathy. 2015 Mar. Report No.: ID496.
10. NICE. National Institute for Health and Care Excellence. Faecal microbiota transplant for recurrent *Clostridium difficile* infection. 2014 Mar. Report No.: Interventional Procedure Guidance 485.
11. Suskind DL, Brittnacher MJ, Wahbeh G, Shaffer ML, Hayden HS, Qin X, et al. Fecal microbial transplant effect on clinical outcomes and fecal microbiome in active Crohn's disease. *Inflamm Bowel Dis*. 2015;21(3):556-63.
12. Kamath PS, Wiesner RH, Malinchoc M, Kremers W, Therneau TM, Kosberg CL, et al. A model to predict survival in patients with end-stage liver disease. *Hepatology*. 2001;33(2):464-70.
13. Mazzaferro V RE, Doci R, Andreola S, Pulvirenti A, Bozzetti F, Montalto F, Ammatuna M, Morabito A, Gennari L Liver transplantation for the treatment of small hepatocellular carcinomas in patients with cirrhosis. *New England Journal of Medicine*. 1996;334(11):693-700.
14. PROFIT A Prospective, randomised placebo controlled feasibility trial of faecal microbiota transplantation in cirrhosis Version 2.0. N/A. 2018.
15. Goldenberg SD BR, Beales I, Digby-Bell J, Irving P, Kellingray L, Narbad A, Franslem-Elumogo N. Comparison of different strategies for providing fecal microbiota transplantation to treat patients with recurrent *Clostridium difficile* infection in two English hospitals: a review. *Infectious Diseases and Therapy* 2018.

1  
2  
3  
4  
5  
6  
7  
8  
9  
10  
11  
12  
13  
14  
15  
16  
17  
18  
19  
20  
21  
22  
23  
24  
25  
26  
27  
28  
29  
30  
31  
32  
33  
34  
35  
36  
37  
38  
39  
40  
41  
42  
43  
44  
45  
46  
47  
48  
49  
50  
51  
52  
53  
54  
55  
56  
57  
58  
59  
60

16. Bajaj JS, Kassam Z, Fagan A, Gavis EA, Liu E, Cox IJ, et al. Fecal Microbiota Transplant from a Rational Stool Donor Improves Hepatic Encephalopathy: A Randomized Clinical Trial. *Hepatology*. 2017.

For peer review only

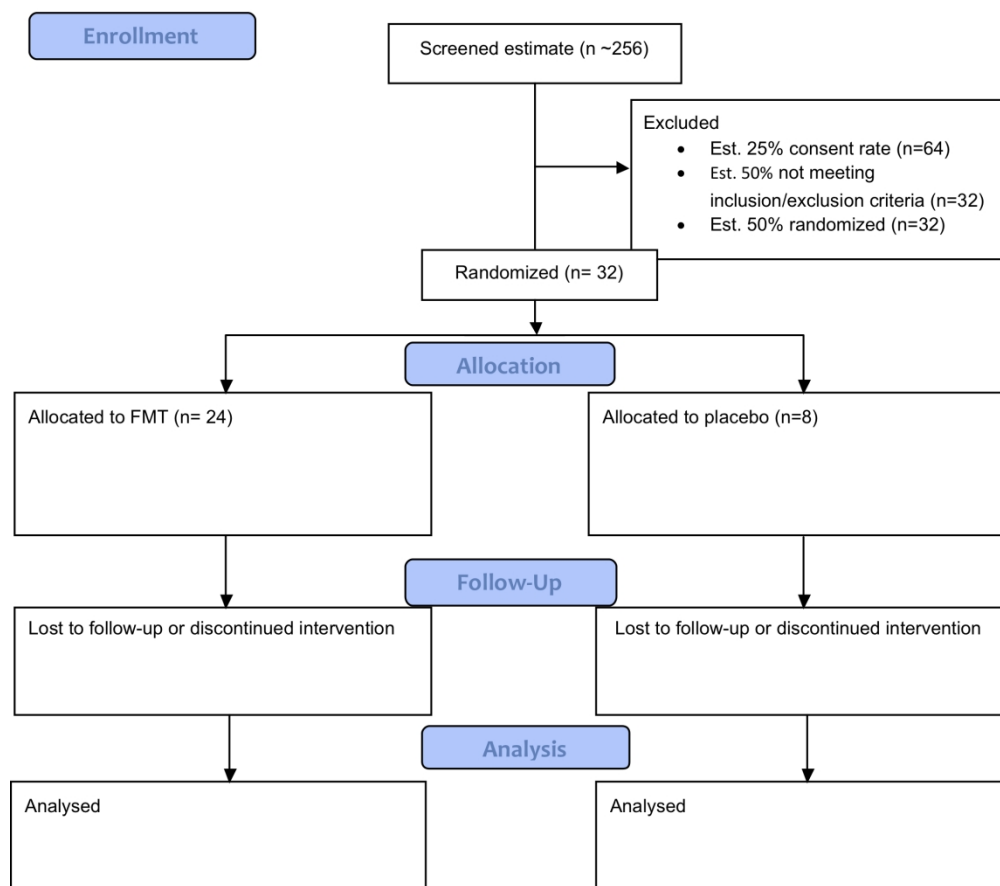

Figure 1 Study Flow Chart and Anticipated Recruitment

190x212mm (300 x 300 DPI)



1  
2  
3  
4  
5  
6  
7  
8  
9  
10  
11  
12  
13  
14  
15  
16  
17  
18  
19  
20  
21  
22  
23  
24  
25  
26  
27  
28  
29  
30  
31  
32  
33  
34  
35  
36  
37  
38  
39  
40  
41  
42  
43  
44  
45  
46  
47  
48  
49  
50  
51  
52  
53  
54  
55  
56  
57  
58  
59  
60

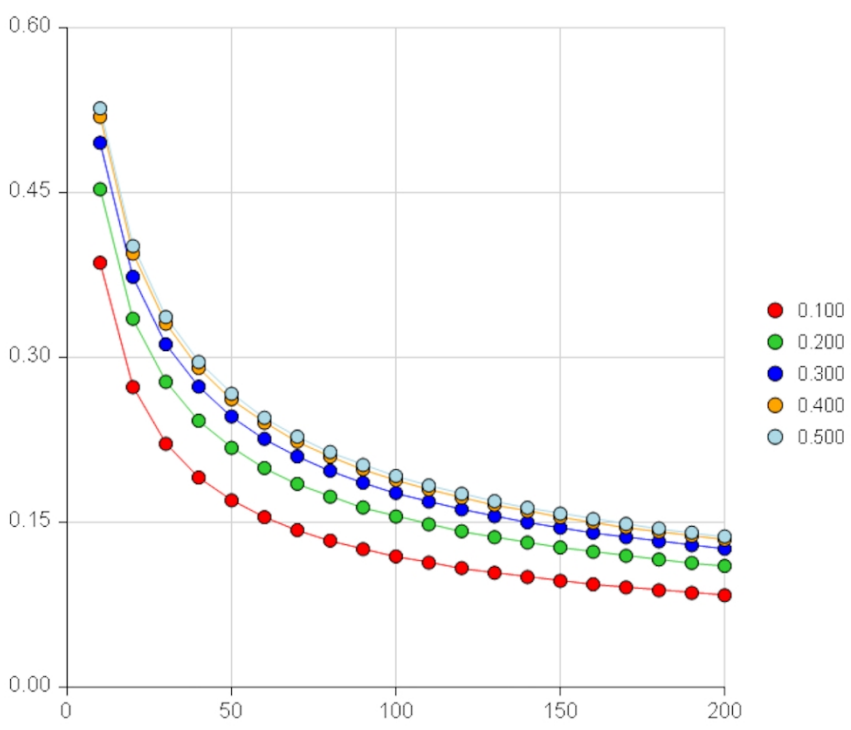

Figure 2 Confidence interval width around one proportion (P) by sample size (N) from PASS software

101x90mm (300 x 300 DPI)

**Participant Consent Form (PROFIT)**

*Title of Study:* **A Prospective, randomized placebo controlled feasibility trial of faecal microbiota transplantation in cirrhosis.**

*Researchers:* **Dr C Woodhouse, Dr V. C. Patel, Prof A. Sanchez-Fueyo, Dr D. Shawcross.**

*Participant Identifier N<sup>o</sup>:*

*Initials:*

Please print your initials in the boxes:

1. I confirm that I have read and understand the participant information sheet \_\_\_\_\_ for the above study and have had the opportunity to ask questions.

2. I understand that my participation in this study is voluntary and that I am free to withdraw at any time, without giving any reason, without my medical care or legal rights being affected.

3. I understand that sections of my medical records may be looked at by responsible individuals or regulatory authorities where it is relevant to taking part in the research. I give permission for these individuals to access my records.

4. I consent to the following samples being collected, stored and analysed: Blood, stool, urine, saliva and ascites (if present)

5. I agree/do not agree (please delete as appropriate) that any surplus samples (including DNA) will be transferred into and stored in the Liver Biobank, and may be used in future, anonymised research

|        |
|--------|
| Yes/No |
|--------|

6. I understand that my General Practitioner will be informed of my participation in this study.

7. I agree to take part in the above study

8. I would like to be sent information regarding the results of this study when available.

[Empty box for participant name]

[Empty box for participant signature]

[Empty box for participant date]

**NAME OF PARTICIPANT**

**Signature**

**Date**

[Empty box for consent name]

[Empty box for consent signature]

[Empty box for consent date]

**NAME OF PERSON OBTAINING CONSENT**

**Signature**

**Date**

[Empty box for witness name]

[Empty box for witness signature]

[Empty box for witness date]

**WITNESS (IF APPLICABLE)**

**Records:**

- 1) Participant (copy)
- 2) Hospital notes (copy)
- 3) Researcher (original)

For peer review only

---

## Participant Information Sheet

---

*Short Title:*           **PROFIT**

*Full Title of Study:*   **A Prospective, randomized placebo controlled feasibility trial of faecal microbiota transplantation in cirrhosis**

*Chief Investigator:*   **Dr D. Shawcross**

*Researchers:*       **Dr C Woodhouse, Dr V. C. Patel, Prof A. Sanchez-Fueyo,**

### Introduction

You are invited to take part in this research study. Before you decide it is important for you to understand why the research is being done and what it will involve. Please take time to read the following carefully and discuss it with friends, family or your GP if you wish. Ask us if there is anything that is not clear or if you would like more information. Take time to decide whether or not you wish to take part.

### What is the purpose of the study?

Our bodies contain trillions of bacteria that live in our bowels. These bacteria help to keep us healthy. Patients with liver cirrhosis have more 'unfriendly' bacteria than people without cirrhosis. Patients with cirrhosis also have a 'leaky' gut, allowing these bacteria to leak into the blood stream, potentially causing serious infections. These can usually be treated with antibiotics, but may be very severe and may also cause kidney failure, hepatic encephalopathy (a condition where toxins build up in the blood stream, causing confusion and even coma) and potentially life threatening bleeding.

The treatment proposed in our study, FMT (faecal microbiota transplantation,) takes the bacteria from the intestines of healthy volunteers and replaces the abnormal bacteria in the gut of a patient with cirrhosis. The aim of faecal microbiota transplantation (FMT) is to replace the 'unfriendly' bacteria with 'friendly' bacteria from healthy volunteers, therefore preventing them from getting into the blood stream and causing serious problems.

Volunteers are screened very thoroughly (in a similar way to blood donors) to ensure that they are healthy and not liable to pass on any infections to the recipients of the FMT.

FMT has been tested in a small group of patients with cirrhosis in America and was found to be safe, and has also been used more widely in other conditions such as patients with a gut infection called 'clostridium difficile' and patients with inflammatory bowel disease. It is extremely successful in these patients and we would like to see if it can be as successful in liver patients.

Results from this study would support further research into the benefit of using FMT to lessen infection rates in patients with liver cirrhosis who have developed bowel problems.

### What groups of patients will the study involve?

We are interested in involving people in this study who have liver cirrhosis of any cause.

**Why have I been invited?**

All patients who are admitted to the Liver wards and/or seen in the Liver out-patient clinics at King's College Hospital NHS Foundation Trust who have liver cirrhosis may be eligible to participate in this study. This also includes patients that are awaiting consideration for or have already been listed for liver transplantation

**Do I have to take part?**

No, participation is entirely voluntary. It is up to you whether or not you wish to take part. If you decide to take part you will be given this information sheet to keep and asked to sign a consent form. If you decide to take part you are still free to withdraw at any time and without giving a reason. This will not affect the medical care you will receive.

**Who is organising and funding this study?**

The doctor in charge of this study is Dr Debbie Shawcross. The study is funded by the National Institute of Health Research and is being sponsored by King's College London and Kings College Hospital NHS Foundation Trust.

**Who has reviewed the study?**

All research in the NHS is looked at by an independent group of people, called a Research Ethics Committee, to protect your interests. This study has been reviewed and approved by the London South East Research Ethics Committee. It has also been approved by the Health Research authority and the Medicines and Healthcare products Regulatory Agency.

**What will happen to me if I take part (SUMMARY)?**

If you decide to take part you will be randomly assigned to one of two groups. One group (the 'active treatment' group) will receive Faecal Microbiota Transplantation (FMT) whilst the other group (the comparison or 'control group') will receive a 'placebo' treatment. Administration of placebo or FMT will take place only ONCE during this study.

The placebo treatment is a 'dummy' treatment given to participants in the control group of a clinical trial. This method using a 'placebo control' is used to make sure the study results are reliable by checking that any changes measured are actually due to the effect of the active drug and not just because of chance. The placebo in this trial is a solution of saline and glycerol (salty water and a preservative, which are the same ingredients used in the FMT itself, just without the FMT.)

Both groups will then be followed up to see how effective the active treatment is based on various measurements taken. Blood, urine, saliva and stool samples will be obtained for tests at four specific times. Firstly when starting the study at 'baseline' (just before the FMT or placebo is given,) and then repeated at 7, 30 and 90 day intervals after treatment has been administered. Follow-up appointments at the 7, 30 day and 90 days after starting will be arranged to coincide as far as possible with planned routine medical appointments.

| Study procedures                  | Screening | Baseline (-7 days) | Endoscopy | Day 7 (+/- 5days) | Day 30 (+/- 7 days) | Day 90 (+/- 7 days) |
|-----------------------------------|-----------|--------------------|-----------|-------------------|---------------------|---------------------|
| Signed informed consent           | X         |                    |           |                   |                     |                     |
| Eligibility Criteria              | X         |                    |           |                   |                     |                     |
| Participant demographics          | X         |                    |           |                   |                     |                     |
| Medical and surgical histories    | X         |                    |           | X                 | X                   | X                   |
| Dietary questionnaire             |           | X                  |           | X                 | X                   | X                   |
| Medication usage                  |           | X                  |           | X                 | X                   | X                   |
| Clinical examination              |           | X                  |           | X                 | X                   | X                   |
| Blood sampling                    |           | X                  |           | X                 | X                   | X                   |
| Stool sampling                    |           | X                  |           | X                 | X                   | X                   |
| Saliva sampling                   |           | X                  |           | X                 | X                   | X                   |
| Urine sampling                    |           | X                  |           | X                 | X                   | X                   |
| Randomisation                     |           | X                  |           |                   |                     |                     |
| FMT/placebo administration        |           |                    | X         |                   |                     |                     |
| Adverse events monitoring /Safety |           |                    | X         | X                 | X                   | X                   |

As part of the study you will have an endoscopy (a camera test looking into your stomach/small bowel) to give you the FMT or the placebo treatment. This means that you will not have to drink the liquid as it is placed directly into the small bowel where it is needed, avoiding the stomach acid, which could stop it working. Before the endoscopy you will be given a medicine to clear your own gut bacteria called 'Moviprep.' This will give you loose bowel motions, which is a normal reaction to the Moviprep. This is essential to clear your own gut bacteria from the bowel to allow the FMT to work.

We will see you after the endoscopy at days 7, 30 and 90 to take blood, urine, saliva and faecal samples from you. We will also assess your general wellbeing and check that your medicines have not changed. Blood samples will usually be taken at the time of when you are having tests done as part of your routine clinical care, to reduce the number of times you have to have a needle in your arm and, where possible, samples will be taken from tubes already in your blood vessels to minimise discomfort to you.

We will ask you to collect the urine and stool samples in the morning of each study visit and bring this with you when you attend clinic. We will ensure you are given all the necessary collection pots for this. After the last visit at 90 days, you will return to the usual standard of care as you were having for you underlying condition.

**More detailed information about the study visits can be found on page 7 of this information sheet.**

### **What are the side effects of taking part?**

If you are assigned to the active treatment group and receive FMT, there are some possible side effects that you should be aware of. Faecal transplants have not been widely used in patients with cirrhosis yet, but have been used in lots of patients with an antibiotic associated diarrhoea called 'clostridium difficile.' Small numbers of patients in these studies reported some abdominal distension/bloating, flatulence, diarrhoea or constipation as side effects of the treatment. Part of this study is to assess how well tolerated the treatment is and whether or not patients with cirrhosis experience similar symptoms.

Side effects of blood sampling can include bruising and it can be uncomfortable. However, every effort will be made to perform blood sampling at the same time as regular blood tests to minimise any discomfort. There should be no side effects of sampling your urine and stool as we will simply ask you to collect the samples when you go to the toilet as normal. Saliva will be collected by asking you to rinse your mouth out with water and to spit into a collection pot.

### **What are the possible disadvantages and risks of taking part?**

We hope that the knowledge we would gain from this study will improve our understanding of the way in which FMT works, and the role of the gut and immune system in liver cirrhosis. Patients who received FMT in a small study in America did well and had fewer hospital admissions than those in the 'standard of care' group. FMT appears to be safe in the considerable numbers of patients who have received it for other reasons. There are no disadvantages or risks involved in taking part with regard to the samples being obtained, and the amount of blood taken will not be harmful to you. The placebo treatment is not harmful, but is not expected to have any benefit on your clinical condition as it contains no active drug or therapy. All patients, regardless of whether they receive placebo or FMT have the same rigorous follow up and support from the trials team.

You will be closely monitored after the treatment is given and will be seen at regular intervals afterwards to see if you have experienced any side effects. We do not anticipate any serious problems to occur after the FMT or placebo treatment, but you will be given contact numbers should you run into any problems outside of the trial visits.

Apart from the side effects of FMT, all patients (those on placebo and active treatment) will need to take bowel preparation, which can cause dehydration. The endoscopy itself also has a small risk of bleeding, perforation (this is very rare and is thought to occur in around only 1 in 2000 tests) and damage to teeth and dental work. There is also a risk of aspiration of the FMT or placebo into the lungs, therefore you will be monitored closely after the procedure to monitor for this.

### **What are the possible benefits of taking part?**

You will be taking part in a new and innovative trial to assess the effect of FMT on cirrhosis. There are few treatments available to patients with cirrhosis, aside from liver transplantation. Unfortunately due to the scarcity of donor organs, even those listed for transplant can wait months or even years for a new liver. Others are too unwell or frail to be listed for transplant. We hope that looking at FMT in more detail may provide a much needed treatment for patients with cirrhosis who are not suitable for transplant or to help those awaiting a new liver. This study is designed to look at the safety and tolerability of the treatment to see if a larger study would show an improvement in wellbeing for these patients.

### **What if I lose the ability to provide consent after enrolling to the study ('loss of capacity)?**

In the event that you lose the ability to provide ongoing consent during the research due to your illness, having been able to provide consent at the start of the study, we will approach an appropriate relative or friend on your behalf to ask them if they think that you would have wanted to continue participation in this study. This person is termed a 'Consultee' and they are asked to set aside their own views and provide advice on you continuing to participate in the research, taking into consideration your wishes and interests.

Any advance decisions you may have made, and that they are aware of, should take precedence. If the Consultee decides that you would have no objection to continue taking part they will be asked to read and sign a consultee declaration form. They will then be given a copy to keep. If they decide that you would not wish to continue taking part we will withdraw you from the study; this will not, in any way, affect the standard of care you receive. If the Consultee we approach does not feel able to take on this role they may want to identify someone else to do it. They will be asked to take time to decide whether or not they feel that you would wish to continue taking part. They will be encouraged to ask the research team if there is anything that is not clear or if they would like more information. The information they will be provided with is the same as that provided to you.

You may wish to identify a suitable Consultee at this stage given the above, so that if you do lose the ability to provide consent after you are enrolled (should you decide to participate in the study) we can approach a person of your choice.

### **What if something goes wrong?**

If you have a concern about any aspect of this study, you should ask to speak to your study doctor who will do their best to answer your questions (contact details on page 8) If you remain unhappy and wish to complain formally, you can do this through the NHS Complaints procedure by contacting your local Patient Advice Liaison Service (PALS) office. Details of your local office can be obtained by asking your study doctor, GP, telephoning your local hospital or looking on the NHS choices website. <http://www.nhs.uk/pages/home.aspx>

Every care will be taken in the course of this study. However in the unlikely event that you are injured by taking part, compensation may be available.

In the event that something does go wrong and you are harmed during the research and this is due to someone's negligence then you may have grounds for a legal action for compensation against King's College Hospital NHS Foundation Trust & King's College London, but you may have to pay your legal costs.

Regardless of this, if you wish to complain, or have any concerns about any aspect of the way you have been approached or treated by members of staff or about any side effects (adverse events) you



1  
2  
3 may have experienced due to your participation in the study the normal National Health Service  
4 complaints mechanisms are available to you. Please ask your study doctor if you would like more  
5 information on this.  
6

### 7 **Will my taking part in this study be kept confidential?**

8  
9 Yes. Once you have consented to take part in the study, you will be given a unique study  
10 number, which will be used to identify any samples and information collected during the  
11 research.

12 Some information regarding you and your condition will be recorded as part of this study. We  
13 will not record any personal identifiable information (name, date of birth or contact details) as  
14 part of the research records. All information will be stored anonymously in a password-  
15 protected database, or in a file in a secure research office. Only your treating doctors and the  
16 research team will have access to this information.  
17

18  
19 We will inform your General Practitioner (GP) of your participation in the study - this is routine  
20 for this type of research and helps them to care for you during the trial. We advise that you  
21 inform your private medical insurance provider (if you hold private medical insurance) of your  
22 participation in this study - this again is routine procedure for this type of research.  
23

### 24 **What will happen to the results of the research study?**

25  
26 When we have results for an adequate number of patients after the study is completed we plan  
27 to publish them in an international journal so that the information can benefit as many people as  
28 possible. We can provide you with a brief summary of the results of the study when available  
29 should you desire this.  
30

### 31 **What will happen to any samples that I give?**

32  
33  
34 Every effort will be made to ensure blood samples for the study are taken at the same time as  
35 samples are taken as part of your routine clinical care – so that there will be no additional  
36 discomfort to you as a result of being involved in this study. The amount of blood taken per time  
37 point for the study is approximately 50mls or 10 teaspoonfuls. This is a small amount for the  
38 body (which contains about 5L of blood, or 5000mL) and will not adversely affect you in any way.  
39

40  
41 Samples of blood and other fluids obtained may be used immediately or saved for human or  
42 bacterial DNA or immune system analysis in the future, in the Liver Biobank. Some of the actual  
43 tests on the samples that are obtained as a result of you taking part in the study will be  
44 performed on site at King's College Hospital NHS Foundation Trust, whilst some samples will be  
45 transferred to other collaborator laboratories in the UK and France. At all times any samples  
46 that are transferred and stored will be coded anonymously regardless of which laboratory they  
47 are sent to.  
48

### 49 **Contact details:**

50  
51 Thank you for taking the time to read this information.  
52

53  
54 If there is any other information you would like, please do not hesitate to contact us on the  
55 numbers below. Out of hours or if a response on the above contact number is unavailable, it is  
56 possible to contact the on-call Hepatology Registrar – via KCH Switchboard – who will pass any  
57 messages on to the senior medical staff involved.  
58

Principal investigator: Dr Debbie Shawcross  
Clinical research fellow: Dr C Woodhouse  
Research nurse: Ane Zamalloa

Tel: 02032992504  
Tel: 02032992504  
Tel: 0203299 7623

For peer review only

1  
2  
3  
4  
5  
6  
7  
8  
9  
10  
11  
12  
13  
14  
15  
16  
17  
18  
19  
20  
21  
22  
23  
24  
25  
26  
27  
28  
29  
30  
31  
32  
33  
34  
35  
36  
37  
38  
39  
40  
41  
42  
43  
44  
45  
46  
47  
48  
49  
50  
51  
52  
53  
54  
55  
56  
57  
58  
59  
60

### **What will happen to me if I take part (DETAILED EXPLANATION)?**

You will be assessed for your eligibility to be involved in this study, and if you are happy to proceed will sign the consent form with a member of the research team. You will then be randomly allocated to one of two treatment groups:

- 1) the 'active treatment' group: participants in this group will receive the treatment being tested (FMT), or
- 2) the comparison or 'control group'; participants in this group will receive a 'placebo' treatment, which is a 'dummy' treatment and is indistinguishable from the actual treatment given to participants in the 'active treatment' group.

Before starting treatment with either of the above, you will undergo baseline assessments, which involve the following (those marked with \* are being done as part of the study):

- Medical history including current medication usage.
- Physical examination including blood pressure, pulse rate, height, weight.
- Dietary questionnaire\* and quality of life questionnaire\*
- Blood sampling: will include tests of blood counts, kidney and liver function performed as part of your routine clinical care as well as checks for various viruses that can affect the liver.
- Blood sampling\*: to measure endotoxin levels, immune function including DNA analysis and metabolic profiling.
- Urine sampling\*: we will ask you to provide a urine sample (approx. 20mls) to measure metabolic profiling. If you are a woman of child-bearing age, we will also do a pregnancy test.
- Stool sampling\*: we will ask you to provide stool samples to measure what types of bacteria are found, and in what patterns and quantities.
- Salivary sampling: \*: we will ask you to provide saliva samples from your mouth to measure what types of bacteria are found, and in what patterns and quantities.
- If you have fluid in your abdomen called "ascites" we would like to take a sample of the fluid to check for infection. This involves passing a small needle into your abdomen under aseptic conditions. This test is voluntary and you do not have to take part, but it would help us to check for infection in the fluid and would mean we could treat any infection early, should one be present\*.

After the baseline assessments have been completed, you will come up to the endoscopy unit to have the FMT or placebo treatment given. The procedure will be explained to you and the risks and benefits discussed. Endoscopy is a safe test, but like all procedures has some risks. The main risks to be aware of are a small risk of bleeding and the risk of perforation (1 in 9000.) There is also a risk of damaging teeth or dental work and a small risk of 'aspiration' which is where fluid from the stomach goes into the lungs. This is why we ask you not to eat for six hours prior to the test, to make sure the stomach is empty. Some people also develop a sore throat after the procedure. This should get better on its own.

You will also be given a medicine prior to the test called 'Moviprep' to help clear your bowels of their usual bacteria prior to the treatment with FMT or placebo. This is a safe medicine, but will cause you to have loose stools. This is essential to its function, but it is important you drink

1  
2  
3 plenty of fluid to prevent dehydration. Side effects can include dehydration, nausea and  
4 vomiting.  
5

6  
7 You will take one sachet of Moviprep mixed with a litre of water at 19.00 the night before the  
8 test. You can then have a light meal. On the morning of the endoscopy you will drink another  
9 sachet of Moviprep mixed with one litre of water at around 7.00am. You can take your usual  
10 medications as normal. There is a lot of fluid to drink, so you may find it easier if it is chilled or  
11 mixed with a squash (not blackcurrant) to make it easier to drink.  
12

13 You will undergo similar assessments to the baseline visit at 7, 30 and 90 day intervals as you did  
14 just before starting treatment. You will in addition undergo the following as part of the study:  
15

- 16 • Study treatment adverse events monitoring\*: this to check whether you may have  
17 experienced any side effects that may be due to the study medication.  
18

19  
20  
21 Your last visit will be at 90 days from the start of the trial. Samples will be collected and you will  
22 be reviewed by the team to check for any side effects. You will have the opportunity to ask  
23 questions to the team at all visits throughout the duration of the study and if you have any  
24 concerns outside of these visits you will be told who to contact.  
25

26 Thank you for taking the time to read this information. If there is any other information you  
27 would like, please do not hesitate to contact us (020 3299 9000 ext. 32504).  
28

29  
30 Dr C Woodhouse, Dr V. C. Patel, Professor A Sanchez-Fueyo, Dr D. Shawcross  
31 Institute of Liver Studies, Kings College Hospital  
32  
33  
34  
35  
36  
37  
38  
39  
40  
41  
42  
43  
44  
45  
46  
47  
48  
49  
50  
51  
52  
53  
54  
55  
56  
57  
58  
59  
60

# BMJ Open

## **PROFIT: A PROspective, randomised placebo controlled feasibility trial of Faecal mIcrobiota Transplantation in cirrhosis: study protocol for a single-blinded trial**

|                                 |                                                                                                                                                                                                                                                                                                                                                                                                                                                                                                                                                                                                                                                                                                                                                                                                                                                          |
|---------------------------------|----------------------------------------------------------------------------------------------------------------------------------------------------------------------------------------------------------------------------------------------------------------------------------------------------------------------------------------------------------------------------------------------------------------------------------------------------------------------------------------------------------------------------------------------------------------------------------------------------------------------------------------------------------------------------------------------------------------------------------------------------------------------------------------------------------------------------------------------------------|
| Journal:                        | <i>BMJ Open</i>                                                                                                                                                                                                                                                                                                                                                                                                                                                                                                                                                                                                                                                                                                                                                                                                                                          |
| Manuscript ID                   | bmjopen-2018-023518.R1                                                                                                                                                                                                                                                                                                                                                                                                                                                                                                                                                                                                                                                                                                                                                                                                                                   |
| Article Type:                   | Protocol                                                                                                                                                                                                                                                                                                                                                                                                                                                                                                                                                                                                                                                                                                                                                                                                                                                 |
| Date Submitted by the Author:   | 18-Sep-2018                                                                                                                                                                                                                                                                                                                                                                                                                                                                                                                                                                                                                                                                                                                                                                                                                                              |
| Complete List of Authors:       | Woodhouse, Charlotte; King's College London, Hepatology<br>Patel, Vishal; Kings College London, Hepatology<br>Goldenberg, Simon; Guy's & St. Thomas' NHS Foundation Trust and King's College,<br>Sanchez Fueyo, Alberto; Kings College London, Hepatology<br>China, Louise; UCL, Division of Medicine<br>O'Brien, Alastair; UCL, Division of Medicine<br>Flach, Clare; 1. School of Population Health & Environmental Sciences, Faculty of Life Sciences & Medicine, King's College London<br>Douriri, Abdel; 1. School of Population Health & Environmental Sciences, Faculty of Life Sciences & Medicine, King's College London<br>Shawcross, Debbie ; Kings College London, Liver Sciences, 1st Floor JBC, School of Immunology & Microbial Sciences Faculty of Life Sciences & Medicine, King's College London, Denmark Hill Campus, London, SE5 9RS |
| <b>Primary Subject Heading</b>: | Gastroenterology and hepatology                                                                                                                                                                                                                                                                                                                                                                                                                                                                                                                                                                                                                                                                                                                                                                                                                          |
| Secondary Subject Heading:      | Pharmacology and therapeutics                                                                                                                                                                                                                                                                                                                                                                                                                                                                                                                                                                                                                                                                                                                                                                                                                            |
| Keywords:                       | cirrhosis, faecal microbiota transplantation, gut microbiota, feasibility                                                                                                                                                                                                                                                                                                                                                                                                                                                                                                                                                                                                                                                                                                                                                                                |
|                                 |                                                                                                                                                                                                                                                                                                                                                                                                                                                                                                                                                                                                                                                                                                                                                                                                                                                          |

SCHOLARONE™  
Manuscripts

**PROFIT: A PROspective, randomised placebo controlled feasibility trial of Faecal microbiota Transplantation in cirrhosis: study protocol for a single-blinded trial**

**C. Woodhouse<sup>1</sup>, V. Patel<sup>1</sup>, S. Goldenberg<sup>2</sup>, A. Sanchez-Fueyo<sup>1</sup>, L. China<sup>3</sup>, A. O'Brien<sup>3</sup>, C. Flach<sup>4</sup>, A. Douiri<sup>4</sup>, D. Shawcross<sup>1</sup>**

- 1. Liver Sciences, 1<sup>st</sup> Floor James Black Centre, School of Immunology & Microbial Sciences, Faculty of Life Sciences & Medicine, King's College London, Denmark Hill Campus, London, SE5 9RS**
- 2. Directorate of Infection, Guy's and St Thomas' NHS Foundation Trust, London**
- 3. Division of Medicine, University College London (UCL), London**
- 4. School of Population Health & Environmental Sciences, Faculty of Life Sciences & Medicine, King's College London**

**Corresponding author: Dr Charlotte Woodhouse, Liver Sciences, 1<sup>st</sup> Floor James Black Centre, School of Immunology & Microbial Sciences, Faculty of Life Sciences & Medicine, King's College London, Denmark Hill Campus SE5 9RS [charlottewoodhouse@nhs.net](mailto:charlottewoodhouse@nhs.net) Tel 02032993713 Fax: 020232993899**

## **Abstract**

### **Introduction**

Patients with advanced cirrhosis have enteric bacterial dysbiosis and translocation of bacteria and their products across the gut epithelial barrier. This culminates in systemic inflammation and endotoxemia, inducing innate immune dysfunction which predisposes to infection, and development of complications such as bleeding, sepsis and hepatic encephalopathy (HE). This feasibility study aims to assess the safety of administering faecal microbiota transplant to patients with cirrhosis and explore the effect of the intervention on their prognosis by achieving restoration of a healthy gut microbiome.

### **Methods and Analysis**

PROFIT is a single-centre, randomized, single-blinded, placebo-controlled study evaluating Faecal Microbiota Transplantation (FMT) against placebo. Patients with advanced but stable cirrhosis with a MELD score between 10 and 16 will be recruited. Twenty-four patients will be randomized to FMT plus standard of care (as per our institutional practice) and eight patients to placebo in a ratio of 3:1. Patients will be evaluated at baseline before the study intervention is administered and at 7, 30 and 90 days post intervention to assess safety and adverse events. FMT/placebo will be administered into the jejunum within 7 days of baseline. Research Ethics approval was given by the London South East Research Ethics committee (ref 17/LO/2081).

1  
2  
3 The primary outcome measure will be safety and feasibility as assessed by recruitment  
4 rates, tolerability and safety of FMT treatment. Results will be disseminated via peer  
5 reviewed journals and international conferences. The recruitment of the first patient  
6 occurred on 23/05/2018.  
7

8  
9 The study has been registered with *ClinicalTrials.gov*— reference number: NCT02862249.  
10 The trial is registered with the European Medicines Agency (EudraCT 2017-003629-13) and  
11 has been adopted by the NIHR (IRAS 197237). This manuscript refers to the version 2.0 of  
12 the protocol; pre-results.  
13

#### 14 **Strengths and limitations of this study**

- 16 • This study is powered to assess feasibility and safety of administering FMT to  
17 patients with cirrhosis, however it is not statistically powered to assess for clinically  
18 relevant outcomes.
- 19 • This is the first study examining the effect of FMT delivered directly into the small  
20 bowel in patients with advanced cirrhosis. This trial does not involve antibiotic pre-  
21 treatment in the FMT group, as has been undertaken in the USA in patients with HE.  
22
- 23 • PROFIT will assess instillation of FMT/placebo directly into the small bowel, as  
24 opposed to the colon-, directly targetting small bowel bacterial overgrowth that is  
25 observed in cirrhosis
- 26 • A limitation of the study is its single-blinded design, which was necessary as the FMT  
27 and placebo (saline with glycerol) are not matched.  
28  
29

#### 30 **Introduction**

31  
32 Patients with advanced cirrhosis have enteric dysbiosis with small bowel bacterial  
33 overgrowth and translocation of bacteria and their products across the gut epithelial barrier  
34 (1). This culminates in systemic inflammation and endotoxaemia, inducing innate immune  
35 dysfunction which predisposes to infection (2), and development of complications such as  
36 bleeding, sepsis and hepatic encephalopathy (3). It also plays a key role in the natural  
37 history of cirrhosis by influencing the rate of progression to advanced liver disease and  
38 terminal liver failure (4).  
39  
40  
41  
42

43 Utilising quantitative metagenomics our group has found 75,245 genes differentially  
44 expressed between patients with cirrhosis and healthy individuals. Over 50% of these  
45 bacterial species are of buccal origin suggesting an invasion of the gut from the mouth in  
46 cirrhosis (5). Patients with cirrhosis also have salivary dysbiosis associated with impaired  
47 salivary defenses and systemic inflammation. Salivary dysbiosis has been shown to be  
48 greater in patients with cirrhosis who developed complications necessitating hospitalisation  
49 within 90 days. Modulating the gut microbiota in patients with cirrhosis with the non-  
50 absorbable antibiotic rifaximin has been associated with improved cognitive performance  
51 and reduction in endotoxaemia in patients with cirrhosis (6, 7). Moreover, we have recently  
52 performed a multi-centre retrospective study including 170 patients in which rifaximin- $\alpha$   
53 therapy given for 90 days significantly (i) reduced hospital re-admission rates after 3 months  
54 treatment, impacting significantly on the NHS resource burden and (ii) reduced overall liver  
55  
56  
57  
58  
59  
60

1  
2  
3 disease severity (as measured by the Child Pugh and Model for End Stage Liver Disease  
4 scores) raising the possibility that modulation of gut microbiota may significantly modify the  
5 natural history of chronic liver failure (8).  
6

7  
8 These data constitute in our view “proof of principle” that modifying the gut microbiota in  
9 patients with cirrhosis improves clinical outcomes. Rifaximin- $\alpha$  was approved by NICE for  
10 the prevention of the recurrence of overt hepatic encephalopathy in cirrhosis (9) but  
11 considerable concern remains regarding whether long term antibiotic prescription will result  
12 in a change in bacterial function and virulence rather than a simple reduction in bacterial  
13 population and whether this may drive bacterial resistance to antibiotics in an already  
14 functionally immunocompromised population. The question was therefore raised as to  
15 whether directly, as opposed to indirectly modulating the gut microbiota utilising faeces  
16 from healthy donors may be a safer and more durable therapy. Faecal microbiota  
17 transplantation (FMT) has been licensed by NICE since 2014 for the treatment of recurrent  
18 *Clostridium difficile* infection (10). FMT has shown promising results in clinical trials of  
19 several disease states resulting from gut dysbiosis beyond *Clostridium difficile* infection (10)  
20 for example in ulcerative colitis (11-14).  
21  
22

23 We hypothesise that in patients with advanced cirrhosis, FMT may reduce the progression  
24 to chronic liver failure including the development of jaundice, ascites, bleeding,  
25 encephalopathy, infection and organ dysfunction. Whether FMT is feasible in the setting of  
26 cirrhosis remains to be investigated. We propose conducting a feasibility trial to determine  
27 whether FMT from a healthy donor will alleviate gut dysbiosis and immune dysfunction in  
28 advanced cirrhosis.  
29  
30

## 31 32 33 **Methods and Analysis**

### 34 35 **Primary Objectives:**

36  
37 The primary objective of this study will be to assess whether stabilising gut dysbiosis with  
38 FMT in patients with advanced cirrhosis is both feasible and safe.  
39  
40

### 41 42 **Primary Endpoints:**

43 The primary endpoints of the study will be twofold. To assess the feasibility of FMT as  
44 determined by the recruitment rates (including acceptability of the intervention) and  
45 tolerability of FMT e.g. gastro-oesophageal reflux rates. The second primary outcome  
46 measure will be to assess the safety of FMT administration, including the incidence of any  
47 transmissible bacterial or viral infection that is deemed to have been acquired from the  
48 donor including *Clostridium difficile* infection.  
49  
50

### 51 52 **Secondary Objectives:**

53  
54 The secondary objectives of the study are to provide preliminary evidence of efficacy for a  
55 larger randomised trial, with the purpose of choosing the optimal primary outcome, and  
56  
57  
58  
59



1  
2  
3 estimating the parameters for sample size calculation. We will also collect blood, stool and  
4 urine samples from participants to assess the stability of the transplanted gut microbiome  
5 by comparing the percentage composition of the stool microbiota on day 7, 30 and 90 with  
6 the donor microbiome. Plasma endotoxin (and endotoxin binding protein), pro- and anti-  
7 inflammatory cytokine levels, bacterial DNA quantification and serum procalcitonin will be  
8 performed at 7, 30 and 90 days as will changes in faecal biomarkers (calprotectin, lactoferrin  
9 and M2-Pyruvate Kinase).  
10

## 11 **Trial Design**

12  
13  
14 PROFIT is a single-centre study. Thirty-two patients will be recruited from out-patient clinics  
15 at King's College Hospital (KCH) or from suitable inpatients on the wards. The patients will  
16 be recruited as per the inclusion and exclusion criteria listed in table 1. Patients will be  
17 randomized in a single-blinded fashion in a ratio of 3:1 FMT to placebo. Patients will be  
18 unaware of the intervention given, but investigators will not be blinded to the treatment  
19 intervention.  
20  
21

## 22 **Patient and Public Involvement**

23  
24 A lay reviewer/patient representative at the NIHR reviewed the protocol. This was funded  
25 by the Research for Patient Benefit programme. Feedback was taken on board and revisions  
26 were subsequently made.  
27  
28

29 The British Liver Trust, British Society of Gastroenterology Liver Research Group and King's  
30 Liver Outpatient Advisory Group (patient group) were all involved in the study set-up and  
31 protocol development at all stages.  
32  
33

34 Results will be disseminated to study participants via the Liver Research Nurse if they  
35 indicate an interest in the study outcome.  
36  
37  
38  
39

40 *Table 1- Inclusion and exclusion criteria*

### 41 **Inclusion Criteria**

- 42 • 18–75 years
- 43 • Confirmed advanced cirrhosis of any aetiology with a MELD (15) score between 10 and  
44 16. The diagnosis of cirrhosis will be based on clinical, radiological, or histological  
45 criteria.
- 46 • Patients with alcohol-related liver disease must have been abstinent from alcohol for a  
47 minimum of 6 weeks.
- 48 • Patients must be deemed to have capacity to consent to the study.
- 49
- 50
- 51
- 52
- 53
- 54
- 55
- 56
- 57
- 58
- 59
- 60

### Exclusion Criteria

- Severe or life-threatening food allergy
- Pregnancy or breastfeeding
- Patients treated for active variceal bleeding, infection, bacterial peritonitis, overt hepatic encephalopathy or acute-on-chronic liver failure within the past 14 days.
- Patients who have received antibiotics in the past 14 days.
- Active alcohol consumption of >20 grams/day.
- Has had a previous liver transplant
- Hepatocellular carcinoma outside of the Milan Criteria (16)
- Inflammatory bowel disease
- Coeliac disease
- A history of prior gastrointestinal resection such as gastric bypass
- Patient is not expected to survive the duration of the study (90 days).
- Severe renal impairment (creatinine >150 µmol/L)
- HIV positive
- Immunosuppression e.g. more than two weeks treatment with corticosteroids within 8 weeks of intervention, active treatment with tacrolimus, mycophenylate, azathioprine.

### Patient Population

The study will include all patients aged 18 to 75 years with capacity to consent and a diagnosis of cirrhosis. Patients will have a MELD (15) score of between 10 and 16. The diagnosis of cirrhosis may be based on radiological, clinical or histological parameters. In the case of alcohol-related cirrhosis, patients must have been abstinent for a minimum of six weeks. The exclusion criteria are outlined in table 1. Anticipated recruitment is outlined in Figure 1 below (17).

### Consent

All participants will be asked to provide informed consent after having had the opportunity to discuss the trial with the clinician, their family and friends and having read the patient information sheet (PIS- see supplementary file.) Patients who lack capacity will not be enrolled in this study. If patients lose capacity during the trial follow up period, an appropriate legal representative will be consulted and will provide consent to ongoing trial participation after appropriate discussion with the trials team and having read the PIS. If the legal representative does not agree to ongoing trial participation, the subject will be withdrawn from trial follow up.

*Figure 1 Study Flow Chart and Anticipated Recruitment*

## Study Intervention

FMT is prepared in a laboratory at St Thomas' Hospital in accordance with the principles of Good Manufacturing Practice (GMP) and under Manufacturing Authorisation for an Investigational Medicinal Product (MIA(IMP)) from the Medicines and Healthcare products Regulatory Agency (MHRA). FMT donors are healthy volunteers with no medical problems and normal body mass index. They must not be taking any regular medications and are rigorously screened for blood borne and enteric pathogens prior to donation. Donors undergo questionnaire screening for risk factors at baseline and again at donation to reduce the risk of transmissible infection as outlined in table 2 (full questionnaire in supplementary materials). Stool is processed (diluted and filtered with the addition of glycerol) within 6 hours of donation and stored at -80 degrees Celsius for up to six months (as previously described) (18). Material for FMT has full traceability from donor to recipient and aliquots of donor stool are kept for 30 years to allow further testing in the case of any adverse events. Placebo is a solution of saline with glycerol without faecal matter.

### Blood (serology)

- HIV 1+2 serology
- HTLV I/II Ab
- Hepatitis A IgG (and if positive IgM)
- Hepatitis B surface antigen (HBsAg) and core antibody
- Hepatitis C (HCV Ab)
- Hepatitis E
- Syphilis
- CMV/EBV IgG/M
- Strongyloides stercoralis (ELISA)

### Stool

- PCR for gastroenteritis agents (*Campylobacter*, *Salmonella*, *Shigella* and *E. coli* O:157)
- Ova, cysts and parasites by concentration and microscopy x3
- *C. difficile* test
- Norovirus PCR
- Screen for gentamicin and carbapenem resistant Gram negative organisms
- Screen for MRSA
- Helicobacter pylori antigen
- Entamoeba histolytica PCR

Table 2 blood and stool testing of donor FMT samples

1  
2  
3  
4  
5  
6  
7  
8  
9  
10  
11  
12  
13  
14  
15  
16  
17  
18  
19  
20  
21  
22  
23  
24  
25  
26  
27  
28  
29  
30  
31  
32  
33  
34  
35  
36  
37  
38  
39  
40  
41  
42  
43  
44  
45  
46  
47  
48  
49  
50  
51  
52  
53  
54  
55  
56  
57  
58  
59  
60

Following identification, all patients will attend a screening visit and sign the informed consent form. If deemed to be eligible they will attend for a baseline visit with full clinical history and examination. Medication history will be recorded. Patients will complete a dietary questionnaire. Baseline samples of blood, urine, saliva and stool will be obtained. All patients will subsequently attend for a gastroscopy at which the FMT or placebo will be administered under direct visualization into the jejunum via a nasojejunal tube. This will be performed as per the local Endoscopy Unit Protocol using topical local anaesthetic spray or midazolam sedation as per patient preference. Patients will first be asked to take bowel preparation to purge the bowel of its native bacteria. This consists of two sachets of Moviprep® taken prior to gastroscopy. Patients will be monitored for side effects in the Clinical Research Facility after the procedure.

### Evaluations during and after treatment

Participants will be reassessed at 7 (+/- 5), 30 (+/-7) and 90 (+/-7) days post intervention. They will be reviewed in the Clinical Research Facility and undergo physical examination, review of medications and dietary changes and adverse event monitoring. Samples of blood, urine, saliva and stool will be taken at these visits also. At the end of the 90 day follow up period, patients will return to their usual care pathway.

### Statistical analysis

#### Sample Size

This feasibility study will evaluate feasibility parameters using 95% Confidence Intervals. The sample size has been proposed mainly to enable the trial to be conducted within the allocated budget and with acceptable precision for continuous outcomes. According to the simulation work by Teare MD et al. (18), even with the relatively small pilot sample size of 20, the planned studies would have at least 80% power to detect the target effect size (for continuous outcomes) more than 75% of the time. Teare et al. recommend that 60 to 100 subjects are sufficient to estimate an event rate (such as recruitment rates) with acceptable precision in a feasibility study, while sample sizes between 24 and 50 have been recommended for the accurate estimation of standard deviations. Therefore, we have chosen a sample size of 32 patients in this trial to have reliable data on all critical parameters (including event rates) which can also be utilised when planning a larger intervention trial. For event rates (e.g. recruitment rates) and particularly in the extreme

case with lower rates e.g. 10%, we estimate a drop of precision by only 5% using our updated sample size and the minimum recommended by Teare et al. (0.16 for 60 patients vs 0.21 for 32 patients). Figure 2 below illustrates the reduction in precision of different rates when the sample size increases for binary outcomes. This sample size will also be feasible within the budget and will provide acceptable information for planning a future large clinical trial.

*Figure 2 Confidence interval width around one proportion (P) by sample size (N) from PASS software REF - PASS 15 Power Analysis and Sample Size Software (2017). NCSS, LLC. Kaysville, Utah, USA, [ncss.com/software/pass](http://ncss.com/software/pass).*

The sample size of 32 patients will undergo randomisation in a 3:1 ratio. This will allow the study to demonstrate feasibility of randomising, yet providing robust evidence with respect to the feasibility of the treatment, and preliminary evidence of efficacy parameters.

The following feasibility criteria have been established:

- 25% of screened patients will consent: 256 patients will allow the estimate of the 2-Sided 95% confidence interval of the proportion of consented patients, where the distance from the observed proportion to the limit is 0.058 units.
- 50% of patients screened will fulfil inclusion/exclusion criteria for the trial: screening 64 patients will allow the estimate of the 2-Sided 95% confidence interval of the proportion of patients eligible, where the distance from the observed proportion to the limit is 0.128 units.
- 80% of randomised patients will complete treatment and follow up: 26 of 32 patients completing will allow the estimate of the 2-Sided 95% confidence interval for a single proportion, where the distance from the observed proportion to the limit is 0.177 units.

Differences between the placebo and treatment group in efficacy binary outcomes, will be estimated along with the two-sided 95% CI. Assuming the proportion with the outcome in the control group is 0.5 our sample size will allow estimation of the half-width of the confidence intervals for different size of differences as indicated below. Differences of 0.4 or higher will be distinguishable from 0.

*Table 3 Half width of confidence intervals for differences in proportions between two groups with given sample size, placebo group  $p=0.5$  (created with PASS software REF - PASS 15 Power Analysis and Sample Size Software (2017). NCSS, LLC. Kaysville, Utah, USA, [ncss.com/software/pass](http://ncss.com/software/pass).)*

| Difference | 0.1   | 0.2   | 0.3   | 0.4   | 0.5   |
|------------|-------|-------|-------|-------|-------|
| Width      | 0.398 | 0.392 | 0.382 | 0.337 | 0.347 |

The half-width of the 95% CI of the difference in means for continuous outcome will be 0.889 SD.

## Clinical Endpoints

Clinical and safety events will be listed and summarised by intervention group. MELD (15) scores will be calculated by visit and treatment group.

## Data synthesis, analysis and presentation

Feasibility and efficacy outcomes will be summarised using the appropriate descriptive statistics, and 95% Confidence Intervals will be calculated to allow for success and go/no go decisions. Biomarker data will be pre-processed according to the established standards for each platform, and statistical analyses will be performed using non-parametric and permutation based methods which are more appropriate for small sample sizes.

## Statistical Software

Analyses will be performed using R and/or Stata statistical software packages.

## Discussion

The PROFIT study is the first study to look at the use of FMT delivered directly into the small bowel in patients with cirrhosis. Liver transplantation is a highly selective treatment and only those most likely to benefit will be listed. Depending on blood type patients can wait up to 24 months for a liver transplant. There are even fewer options for patients who are unsuitable for transplantation.

Cirrhosis is often complicated by recurrent admissions with sepsis, variceal bleeding, ascites and hepatic encephalopathy. We know that patients with cirrhosis have enteric dysbiosis and altered gut permeability. The non-absorbable antibiotic rifaximin has proved useful in patients with cirrhosis and chronic hepatic encephalopathy, but the long-term benefits of antibiotic use are unknown and the possibility of development of bacterial resistance remains with all antibiotics. The possibility of re-populating the gut of cirrhotic patients with healthy gut microbiota could be a potential alternative, providing a new treatment approach for these vulnerable individuals.

A group in the USA have recently published the results of the impact of FMT delivered via enema in 10 cirrhotic patients, compared with 10 patients receiving standard of care treatment (19). FMT was found to be safe and the patients in the treatment group did not have any admissions for HE, whereas there were six episodes of HE in the standard of care group. Four of these episodes required hospital admission. The FMT group were treated with broad spectrum antibiotics prior to FMT administration, whereas the standard of care group were not, meaning that the effects of FMT cannot be clearly separated from the antibiotic administration. We hope that PROFIT will add to the knowledge base of the use of FMT in cirrhosis and will provide an accurate assessment of the safety of FMT. We plan to treat the FMT and control groups identically, aside from the administration of FMT to accurately assess its impact, without the confounding factor of antibiotic treatment.

1  
2  
3 A limitation of our study is the single-blinded design. This was selected due to the inherent  
4 difficulties in preparing a matched placebo, without introducing substances that may upset  
5 the delicate gut microbiota. The IMP will be delivered by the trial investigators, so it has not  
6 been possible to blind the clinicians in this study. Patients and the trial statistician will be  
7 blinded.  
8

9  
10 The study is not powered to detect differences in clinical outcomes, but may provide  
11 evidence for markers relating to clinical outcomes that could be studied in a larger RCT.  
12

### 13 **Sponsor**

14  
15 The PROFIT trial is co-sponsored by King's College Hospital and Kings' College London. The  
16 funding was supplied by an NIHR research grant for patient benefit (PB-PG-0215-36070).  
17

### 18 **Trial Monitoring Groups**

#### 19 **Trial Steering Committee (TSC)**

20  
21 This group will oversee the running of the trial and discuss any issues that may arise  
22 throughout the process of recruitment and follow up of patients. The group will be chaired  
23 by an independent clinician. Investigators will report to the group on a regular basis. The  
24 Data Monitoring Committee (DMC) will inform the TSC if there are any issues raised from its  
25 discussions.  
26  
27  
28  
29  
30

#### 31 **Data Monitoring Committee**

32  
33 This is an entirely independent group that analyzes interim data, to determine whether or  
34 not the trial is safe to continue. It monitors adverse events and adverse reactions and reacts  
35 to any issues and directs the TSC as to whether or not the trial should continue. The DMC  
36 undertakes interim statistical analysis using an independent statistician to ensure the  
37 ongoing safety and integrity of the trial. The members of this committee are independent of  
38 the trial, but will be experienced clinicians with expertise in clinical trials.  
39  
40  
41

### 42 **Ethics and Dissemination**

43  
44 The ethical permission has been given by the South-East Research Ethics Committee, REC  
45 reference 17/LO/2081, IRAS project ID 197237. EUDRACT number 2017-003629-13.

46 The results of the trial will be analyzed and published in a peer reviewed journal and  
47 disseminated at international conferences.  
48  
49  
50

### 51 **Funding statement**

52  
53 This work was supported by the NIHR, grant number PB-PG-0215-36070. This paper  
54 presents independent research funded by the National Institute for Health Research (NIHR)  
55 under its Research for Patient Benefit (RfPB) Programme (Grant Reference Number PB-PG-  
56  
57  
58  
59  
60

0215-36070). The views expressed are those of the author(s) and not necessarily those of the NHS, the NIHR or the Department of Health & Social Care.

### Competing Interests Statement

Dr Shawcross has received fees from Norgine, Falk and Shinogi-, outside the submitted work. Dr Goldenberg reports grants and personal fees from Astellas, personal fees from MSD, personal fees from Pfizer, personal fees from Shinogi, outside the submitted work.

### Acknowledgements

We would like to thank the clinicians involved, King's College Hospital R&D Department, the NIHR, patient advisers and lay reviewers for their contributions in the set-up of the PROFIT trial. We would also like to acknowledge Liz Allen, our QP, for her contribution to the MHRA approval process.

### Author Contributions

CW and DS wrote the manuscript, with assistance from SG, VP and ASF. AD and CF prepared the statistical analysis plan. LC and AO'B advised on study analyses and the format of the protocol for submission. SG provided the expert advice on FMT and has set up the FMT service at GSTT, which will supply the FMT to the study. All authors reviewed and edited the manuscript prior to submission.



1. Wiest R, Garcia-Tsao G. Bacterial translocation (BT) in cirrhosis. *Hepatology*. 2005;41(3):422-33.
2. Jalan R, Fernandez J, Wiest R, Schnabl B, Moreau R, Angeli P, et al. Bacterial infections in cirrhosis: a position statement based on the EASL Special Conference 2013. *J Hepatol*. 2014;60(6):1310-24.
3. Bajaj JS, Heuman D. M., Hylemin P.B. Sanyal A. J., White M. B. <Altered profile of human gut microbiome is associated with cirrhosis and its complications>. *Journal of Hepatology*. 2014;60:940-7
4. Nolan JP. The role of intestinal endotoxin in liver injury: a long and evolving history. *Hepatology*. 2010;52(5):1829-35.
5. Qin N, Yang F, Li A, Prifti E, Chen Y, Shao L, et al. Alterations of the human gut microbiome in liver cirrhosis. *Nature*. 2014;513(7516):59-64.
6. Bajaj JS, Heuman DM, Sanyal AJ, Hylemon PB, Sterling RK, Stravitz RT, et al. Modulation of the metabiome by rifaximin in patients with cirrhosis and minimal hepatic encephalopathy. *PLoS One*. 2013;8(4):e60042.
7. Shawcross DL. Is it time to target gut dysbiosis and immune dysfunction in the therapy of hepatic encephalopathy? *Expert Rev Gastroenterol Hepatol*. 2015;9(5):539-42.
8. Patel V OJ, Sturgeon J, Habtemariam Z, Preedy H, Richardson P, et al. Rifaximin Is Efficacious In The Treatment Of Chronic Overt Hepatic Encephalopathy: A UK Liver Multi-Centre Experience [Abstract]Suppl 1 *Gut* 2014;63.
9. NICE. National Institute for Health and Care Excellence. Rifaximin for the maintenance treatment of hepatic encephalopathy. 2015 Mar. Report No.: ID496.
10. NICE. National Institute for Health and Care Excellence. Faecal microbiota transplant for recurrent *Clostridium difficile* infection. 2014 Mar. Report No.: Interventional Procedure Guidance 485.
11. Sudarshan Paramsothy MAK, Nadeem O Kaakoush, Alissa J Walsh, Johan van den Bogaerde, Douglas Samuel, Rupert W L Leong, Susan Connor, Watson Ng, Ramesh Paramsothy, Wei Xuan, Enmoore Lin, Hazel M Mitchell, Thomas J Borody. <Multidonor intensive faecal microbiota transplantation for active UC; a randomised placebo controlled trial.pdf>. *Lancet*. 2017;389:1218-28.
12. Paramsothy S, Paramsothy R, Rubin DT, Kamm MA, Kaakoush NO, Mitchell HM, et al. Faecal Microbiota Transplantation for Inflammatory Bowel Disease: A Systematic Review and Meta-analysis. *J Crohns Colitis*. 2017;11(10):1180-99.
13. Rossen NG, Fuentes S, van der Spek MJ, Tijssen JG, Hartman JH, Duflo A, et al. Findings From a Randomized Controlled Trial of Fecal Transplantation for Patients With Ulcerative Colitis. *Gastroenterology*. 2015;149(1):110-8 e4.
14. Moayyedi P, Surette MG, Kim PT, Libertucci J, Wolfe M, Onischi C, et al. Fecal Microbiota Transplantation Induces Remission in Patients With Active Ulcerative Colitis in a Randomized Controlled Trial. *Gastroenterology*. 2015;149(1):102-9 e6.
15. Kamath PS, Wiesner RH, Malinchoc M, Kremers W, Therneau TM, Kosberg CL, et al. A model to predict survival in patients with end-stage liver disease. *Hepatology*. 2001;33(2):464-70.

1  
2  
3 16. Mazzaferro V RE, Doci R, Andreola S, Pulvirenti A, Bozzetti F, Montalto F, Ammatuna  
4 M, Morabito A, Gennari L Liver transplantation for the treatment of small hepatocellular  
5 carcinomas in patients with cirrhosis. *New England Journal of Medicine*. 1996;334(11):693-  
6 700.

7 17. DL S. RANDOMISED CLINICAL FEASIBILITY TRIAL PROTOCOL PROFIT: A PROspective,  
8 randomised placebo controlled feasibility trial of Faecal mIcrobiota Transplantation in  
9 cirrhosis  
10 . 2015.

11 18. Goldenberg SD BR, Beales I, Digby-Bell J, Irving P, Kellingray L, Narbad A, Franslem-  
12 Elumogo N. Comparison of different strategies for providing fecal microbiota  
13 transplantation to treat patients with recurrent *Clostridium difficile* infection in two English  
14 hospitals: a review. *Infectious Diseases and Therapy* 2018.

15 19. Bajaj JS, Kassam Z, Fagan A, Gavis EA, Liu E, Cox JJ, et al. Fecal Microbiota Transplant  
16 from a Rational Stool Donor Improves Hepatic Encephalopathy: A Randomized Clinical Trial.  
17 *Hepatology*. 2017.  
18  
19  
20  
21  
22  
23  
24  
25  
26  
27  
28  
29  
30  
31  
32  
33  
34  
35  
36  
37  
38  
39  
40  
41  
42  
43  
44  
45  
46  
47  
48  
49  
50  
51  
52  
53  
54  
55  
56  
57  
58  
59  
60

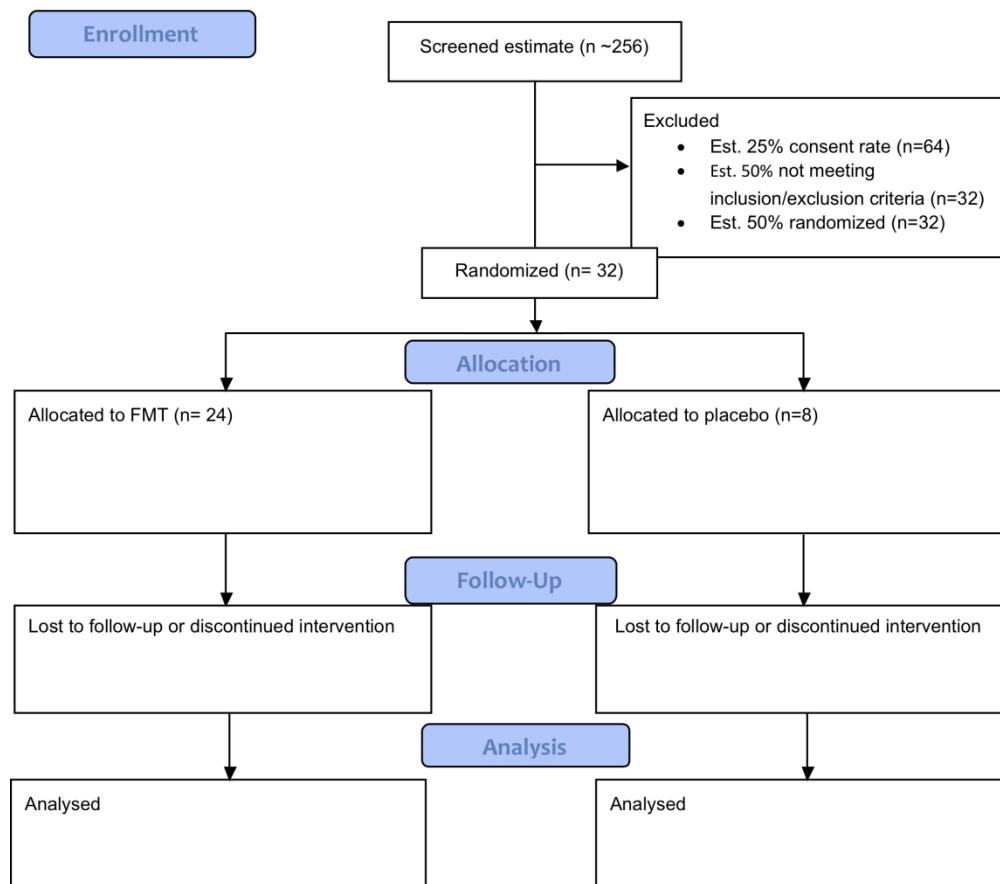

Figure 1 Study Flow Chart and Anticipated Recruitment

190x212mm (300 x 300 DPI)

1  
2  
3  
4  
5  
6  
7  
8  
9  
10  
11  
12  
13  
14  
15  
16  
17  
18  
19  
20  
21  
22  
23  
24  
25  
26  
27  
28  
29  
30  
31  
32  
33  
34  
35  
36  
37  
38  
39  
40  
41  
42  
43  
44  
45  
46  
47  
48  
49  
50  
51  
52  
53  
54  
55  
56  
57  
58  
59  
60



Figure 2 Confidence interval width around one proportion (P) by sample size (N) from PASS software

101x90mm (300 x 300 DPI)

---

## Participant Information Sheet

---

*Short Title:*           **PROFIT**

*Full Title of Study:*   **A Prospective, randomized placebo controlled feasibility trial of faecal microbiota transplantation in cirrhosis**

*Chief Investigator:*   **Dr D. Shawcross**

*Researchers:*         **Dr C Woodhouse, Dr V. C. Patel, Prof A. Sanchez-Fueyo,**

### Introduction

You are invited to take part in this research study. Before you decide it is important for you to understand why the research is being done and what it will involve. Please take time to read the following carefully and discuss it with friends, family or your GP if you wish. Ask us if there is anything that is not clear or if you would like more information. Take time to decide whether or not you wish to take part.

### What is the purpose of the study?

Our bodies contain trillions of bacteria that live in our bowels. These bacteria help to keep us healthy. Patients with liver cirrhosis have more 'unfriendly' bacteria than people without cirrhosis. Patients with cirrhosis also have a 'leaky' gut, allowing these bacteria to leak into the blood stream, potentially causing serious infections. These can usually be treated with antibiotics, but may be very severe and may also cause kidney failure, hepatic encephalopathy (a condition where toxins build up in the blood stream, causing confusion and even coma) and potentially life threatening bleeding.

The treatment proposed in our study, FMT (faecal microbiota transplantation,) takes the bacteria from the intestines of healthy volunteers and replaces the abnormal bacteria in the gut of a patient with cirrhosis. The aim of faecal microbiota transplantation (FMT) is to replace the 'unfriendly' bacteria with 'friendly' bacteria from healthy volunteers, therefore preventing them from getting into the blood stream and causing serious problems.

Volunteers are screened very thoroughly (in a similar way to blood donors) to ensure that they are healthy and not liable to pass on any infections to the recipients of the FMT.

FMT has been tested in a small group of patients with cirrhosis in America and was found to be safe, and has also been used more widely in other conditions such as patients with a gut infection called 'clostridium difficile' and patients with inflammatory bowel disease. It is extremely successful in these patients and we would like to see if it can be as successful in liver patients.

Results from this study would support further research into the benefit of using FMT to lessen infection rates in patients with liver cirrhosis who have developed bowel problems.

### What groups of patients will the study involve?

We are interested in involving people in this study who have liver cirrhosis of any cause.

**Why have I been invited?**

All patients who are admitted to the Liver wards and/or seen in the Liver out-patient clinics at King's College Hospital NHS Foundation Trust who have liver cirrhosis may be eligible to participate in this study. This also includes patients that are awaiting consideration for or have already been listed for liver transplantation

**Do I have to take part?**

No, participation is entirely voluntary. It is up to you whether or not you wish to take part. If you decide to take part you will be given this information sheet to keep and asked to sign a consent form. If you decide to take part you are still free to withdraw at any time and without giving a reason. This will not affect the medical care you will receive.

**Who is organising and funding this study?**

The doctor in charge of this study is Dr Debbie Shawcross. The study is funded by the National Institute of Health Research and is being sponsored by King's College London and Kings College Hospital NHS Foundation Trust.

**Who has reviewed the study?**

All research in the NHS is looked at by an independent group of people, called a Research Ethics Committee, to protect your interests. This study has been reviewed and approved by the London South East Research Ethics Committee. It has also been approved by the Health Research authority and the Medicines and Healthcare products Regulatory Agency.

**What will happen to me if I take part (SUMMARY)?**

If you decide to take part you will be randomly assigned to one of two groups. One group (the 'active treatment' group) will receive Faecal Microbiota Transplantation (FMT) whilst the other group (the comparison or 'control group') will receive a 'placebo' treatment. Administration of placebo or FMT will take place only ONCE during this study.

The placebo treatment is a 'dummy' treatment given to participants in the control group of a clinical trial. This method using a 'placebo control' is used to make sure the study results are reliable by checking that any changes measured are actually due to the effect of the active drug and not just because of chance. The placebo in this trial is a solution of saline and glycerol (salty water and a preservative, which are the same ingredients used in the FMT itself, just without the FMT.)

Both groups will then be followed up to see how effective the active treatment is based on various measurements taken. Blood, urine, saliva and stool samples will be obtained for tests at four specific times. Firstly when starting the study at 'baseline' (just before the FMT or placebo is given,) and then repeated at 7, 30 and 90 day intervals after treatment has been administered. Follow-up appointments at the 7, 30 day and 90 days after starting will be arranged to coincide as far as possible with planned routine medical appointments.

| Study procedures                  | Screening | Baseline (-7 days) | Endoscopy | Day 7 (+/- 5days) | Day 30 (+/- 7 days) | Day 90 (+/- 7 days) |
|-----------------------------------|-----------|--------------------|-----------|-------------------|---------------------|---------------------|
| Signed informed consent           | X         |                    |           |                   |                     |                     |
| Eligibility Criteria              | X         |                    |           |                   |                     |                     |
| Participant demographics          | X         |                    |           |                   |                     |                     |
| Medical and surgical histories    | X         |                    |           | X                 | X                   | X                   |
| Dietary questionnaire             |           | X                  |           | X                 | X                   | X                   |
| Medication usage                  |           | X                  |           | X                 | X                   | X                   |
| Clinical examination              |           | X                  |           | X                 | X                   | X                   |
| Blood sampling                    |           | X                  |           | X                 | X                   | X                   |
| Stool sampling                    |           | X                  |           | X                 | X                   | X                   |
| Saliva sampling                   |           | X                  |           | X                 | X                   | X                   |
| Urine sampling                    |           | X                  |           | X                 | X                   | X                   |
| Randomisation                     |           | X                  |           |                   |                     |                     |
| FMT/placebo administration        |           |                    | X         |                   |                     |                     |
| Adverse events monitoring /Safety |           |                    | X         | X                 | X                   | X                   |

As part of the study you will have an endoscopy (a camera test looking into your stomach/small bowel) to give you the FMT or the placebo treatment. This means that you will not have to drink the liquid as it is placed directly into the small bowel where it is needed, avoiding the stomach acid, which could stop it working. Before the endoscopy you will be given a medicine to clear your own gut bacteria called 'Moviprep.' This will give you loose bowel motions, which is a normal reaction to the Moviprep. This is essential to clear your own gut bacteria from the bowel to allow the FMT to work.

We will see you after the endoscopy at days 7, 30 and 90 to take blood, urine, saliva and faecal samples from you. We will also assess your general wellbeing and check that your medicines have not changed. Blood samples will usually be taken at the time of when you are having tests done as part of your routine clinical care, to reduce the number of times you have to have a needle in your arm and, where possible, samples will be taken from tubes already in your blood vessels to minimise discomfort to you.

We will ask you to collect the urine and stool samples in the morning of each study visit and bring this with you when you attend clinic. We will ensure you are given all the necessary collection pots for this. After the last visit at 90 days, you will return to the usual standard of care as you were having for you underlying condition.

**More detailed information about the study visits can be found on page 7 of this information sheet.**

### What are the side effects of taking part?

If you are assigned to the active treatment group and receive FMT, there are some possible side effects that you should be aware of. Faecal transplants have not been widely used in patients with cirrhosis yet, but have been used in lots of patients with an antibiotic associated diarrhoea called 'clostridium difficile.' Small numbers of patients in these studies reported some abdominal distension/bloating, flatulence, diarrhoea or constipation as side effects of the treatment. Part of this study is to assess how well tolerated the treatment is and whether or not patients with cirrhosis experience similar symptoms.

Side effects of blood sampling can include bruising and it can be uncomfortable. However, every effort will be made to perform blood sampling at the same time as regular blood tests to minimise any discomfort. There should be no side effects of sampling your urine and stool as we will simply ask you to collect the samples when you go to the toilet as normal. Saliva will be collected by asking you to rinse your mouth out with water and to spit into a collection pot.

### **What are the possible disadvantages and risks of taking part?**

We hope that the knowledge we would gain from this study will improve our understanding of the way in which FMT works, and the role of the gut and immune system in liver cirrhosis. Patients who received FMT in a small study in America did well and had fewer hospital admissions than those in the 'standard of care' group. FMT appears to be safe in the considerable numbers of patients who have received it for other reasons. There are no disadvantages or risks involved in taking part with regard to the samples being obtained, and the amount of blood taken will not be harmful to you. The placebo treatment is not harmful, but is not expected to have any benefit on your clinical condition as it contains no active drug or therapy. All patients, regardless of whether they receive placebo or FMT have the same rigorous follow up and support from the trials team.

You will be closely monitored after the treatment is given and will be seen at regular intervals afterwards to see if you have experienced any side effects. We do not anticipate any serious problems to occur after the FMT or placebo treatment, but you will be given contact numbers should you run into any problems outside of the trial visits.

Apart from the side effects of FMT, all patients (those on placebo and active treatment) will need to take bowel preparation, which can cause dehydration. The endoscopy itself also has a small risk of bleeding, perforation (this is very rare and is thought to occur in around only 1 in 2000 tests) and damage to teeth and dental work. There is also a risk of aspiration of the FMT or placebo into the lungs, therefore you will be monitored closely after the procedure to monitor for this.

### **What are the possible benefits of taking part?**

You will be taking part in a new and innovative trial to assess the effect of FMT on cirrhosis. There are few treatments available to patients with cirrhosis, aside from liver transplantation. Unfortunately due to the scarcity of donor organs, even those listed for transplant can wait months or even years for a new liver. Others are too unwell or frail to be listed for transplant. We hope that looking at FMT in more detail may provide a much needed treatment for patients with cirrhosis who are not suitable for transplant or to help those awaiting a new liver. This study is designed to look at the safety and tolerability of the treatment to see if a larger study would show an improvement in wellbeing for these patients.



### What if I lose the ability to provide consent after enrolling to the study ('loss of capacity')?

In the event that you lose the ability to provide ongoing consent during the research due to your illness, having been able to provide consent at the start of the study, we will approach an appropriate relative or friend on your behalf to ask them if they think that you would have wanted to continue participation in this study. This person is termed a 'Consultee' and they are asked to set aside their own views and provide advice on you continuing to participate in the research, taking into consideration your wishes and interests.

Any advance decisions you may have made, and that they are aware of, should take precedence. If the Consultee decides that you would have no objection to continue taking part they will be asked to read and sign a consultee declaration form. They will then be given a copy to keep. If they decide that you would not wish to continue taking part we will withdraw you from the study; this will not, in any way, affect the standard of care you receive. If the Consultee we approach does not feel able to take on this role they may want to identify someone else to do it. They will be asked to take time to decide whether or not they feel that you would wish to continue taking part. They will be encouraged to ask the research team if there is anything that is not clear or if they would like more information. The information they will be provided with is the same as that provided to you.

You may wish to identify a suitable Consultee at this stage given the above, so that if you do lose the ability to provide consent after you are enrolled (should you decide to participate in the study) we can approach a person of your choice.

### What if something goes wrong?

If you have a concern about any aspect of this study, you should ask to speak to your study doctor who will do their best to answer your questions (contact details on page 8) If you remain unhappy and wish to complain formally, you can do this through the NHS Complaints procedure by contacting your local Patient Advice Liaison Service (PALS) office. Details of your local office can be obtained by asking your study doctor, GP, telephoning your local hospital or looking on the NHS choices website. <http://www.nhs.uk/pages/home.aspx>

Every care will be taken in the course of this study. However in the unlikely event that you are injured by taking part, compensation may be available.

In the event that something does go wrong and you are harmed during the research and this is due to someone's negligence then you may have grounds for a legal action for compensation against King's College Hospital NHS Foundation Trust & King's College London, but you may have to pay your legal costs.

Regardless of this, if you wish to complain, or have any concerns about any aspect of the way you have been approached or treated by members of staff or about any side effects (adverse events) you may have experienced due to your participation in the study the normal National Health Service

complaints mechanisms are available to you. Please ask your study doctor if you would like more information on this.

### **Will my taking part in this study be kept confidential?**

Yes. Once you have consented to take part in the study, you will be given a unique study number, which will be used to identify any samples and information collected during the research.

Some information regarding you and your condition will be recorded as part of this study. We will not record any personal identifiable information (name, date of birth or contact details) as part of the research records. All information will be stored anonymously in a password-protected database, or in a file in a secure research office. Only your treating doctors and the research team will have access to this information.

We will inform your General Practitioner (GP) of your participation in the study - this is routine for this type of research and helps them to care for you during the trial. We advise that you inform your private medical insurance provider (if you hold private medical insurance) of your participation in this study - this again is routine procedure for this type of research.

### **What will happen to the results of the research study?**

When we have results for an adequate number of patients after the study is completed we plan to publish them in an international journal so that the information can benefit as many people as possible. We can provide you with a brief summary of the results of the study when available should you desire this.

### **What will happen to any samples that I give?**

Every effort will be made to ensure blood samples for the study are taken at the same time as samples are taken as part of your routine clinical care – so that there will be no additional discomfort to you as a result of being involved in this study. The amount of blood taken per time point for the study is approximately 50mls or 10 teaspoonfuls. This is a small amount for the body (which contains about 5L of blood, or 5000mL) and will not adversely affect you in any way.

Samples of blood and other fluids obtained may be used immediately or saved for human or bacterial DNA or immune system analysis in the future, in the Liver Biobank. Some of the actual tests on the samples that are obtained as a result of you taking part in the study will be performed on site at King's College Hospital NHS Foundation Trust, whilst some samples will be transferred to other collaborator laboratories in the UK and France. At all times any samples that are transferred and stored will be coded anonymously regardless of which laboratory they are sent to.

### **Contact details:**

Thank you for taking the time to read this information.

If there is any other information you would like, please do not hesitate to contact us on the numbers below. Out of hours or if a response on the above contact number is unavailable, it is possible to contact the on-call Hepatology Registrar – via KCH Switchboard – who will pass any messages on to the senior medical staff involved.

Principal investigator: Dr Debbie Shawcross  
Clinical research fellow: Dr C Woodhouse  
Research nurse: Ane Zamalloa

Tel: 02032992504  
Tel: 02032992504  
Tel: 0203299 7623

For peer review only

1  
2  
3  
4  
5  
6  
7  
8  
9  
10  
11  
12  
13  
14  
15  
16  
17  
18  
19  
20  
21  
22  
23  
24  
25  
26  
27  
28  
29  
30  
31  
32  
33  
34  
35  
36  
37  
38  
39  
40  
41  
42  
43  
44  
45  
46  
47  
48  
49  
50  
51  
52  
53  
54  
55  
56  
57  
58  
59  
60

### **What will happen to me if I take part (DETAILED EXPLANATION)?**

You will be assessed for your eligibility to be involved in this study, and if you are happy to proceed will sign the consent form with a member of the research team. You will then be randomly allocated to one of two treatment groups:

- 1) the 'active treatment' group: participants in this group will receive the treatment being tested (FMT), or
- 2) the comparison or 'control group'; participants in this group will receive a 'placebo' treatment, which is a 'dummy' treatment and is indistinguishable from the actual treatment given to participants in the 'active treatment' group.

Before starting treatment with either of the above, you will undergo baseline assessments, which involve the following (those marked with \* are being done as part of the study):

- Medical history including current medication usage.
- Physical examination including blood pressure, pulse rate, height, weight.
- Dietary questionnaire\* and quality of life questionnaire\*
- Blood sampling: will include tests of blood counts, kidney and liver function performed as part of your routine clinical care as well as checks for various viruses that can affect the liver.
- Blood sampling\*: to measure endotoxin levels, immune function including DNA analysis and metabolic profiling.
- Urine sampling\*: we will ask you to provide a urine sample (approx. 20mls) to measure metabolic profiling. If you are a woman of child-bearing age, we will also do a pregnancy test.
- Stool sampling\*: we will ask you to provide stool samples to measure what types of bacteria are found, and in what patterns and quantities.
- Salivary sampling\*: we will ask you to provide saliva samples from your mouth to measure what types of bacteria are found, and in what patterns and quantities.
- If you have fluid in your abdomen called "ascites" we would like to take a sample of the fluid to check for infection. This involves passing a small needle into your abdomen under aseptic conditions. This test is voluntary and you do not have to take part, but it would help us to check for infection in the fluid and would mean we could treat any infection early, should one be present\*.

After the baseline assessments have been completed, you will come up to the endoscopy unit to have the FMT or placebo treatment given. The procedure will be explained to you and the risks and benefits discussed. Endoscopy is a safe test, but like all procedures has some risks. The main risks to be aware of are a small risk of bleeding and the risk of perforation (1 in 9000.) There is also a risk of damaging teeth or dental work and a small risk of 'aspiration' which is where fluid from the stomach goes into the lungs. This is why we ask you not to eat for six hours prior to the test, to make sure the stomach is empty. Some people also develop a sore throat after the procedure. This should get better on its own.

You will also be given a medicine prior to the test called 'Moviprep' to help clear your bowels of their usual bacteria prior to the treatment with FMT or placebo. This is a safe medicine, but will cause you to have loose stools. This is essential to its function, but it is important you drink

1  
2  
3  
4 plenty of fluid to prevent dehydration. Side effects can include dehydration, nausea and  
5 vomiting.  
6

7 You will take one sachet of Moviprep mixed with a litre of water at 19.00 the night before the  
8 test. You can then have a light meal. On the morning of the endoscopy you will drink another  
9 sachet of Moviprep mixed with one litre of water at around 7.00am. You can take your usual  
10 medications as normal. There is a lot of fluid to drink, so you may find it easier if it is chilled or  
11 mixed with a squash (not blackcurrant) to make it easier to drink.  
12  
13

14 You will undergo similar assessments to the baseline visit at 7, 30 and 90 day intervals as you did  
15 just before starting treatment. You will in addition undergo the following as part of the study:  
16

- 17 • Study treatment adverse events monitoring\*: this to check whether you may have  
18 experienced any side effects that may be due to the study medication.  
19

20  
21  
22 Your last visit will be at 90 days from the start of the trial. Samples will be collected and you will  
23 be reviewed by the team to check for any side effects. You will have the opportunity to ask  
24 questions to the team at all visits throughout the duration of the study and if you have any  
25 concerns outside of these visits you will be told who to contact.  
26  
27

28 Thank you for taking the time to read this information. If there is any other information you  
29 would like, please do not hesitate to contact us (020 3299 9000 ext. 32504).  
30  
31

32 Dr C Woodhouse, Dr V. C. Patel, Professor A Sanchez-Fueyo, Dr D. Shawcross  
33 Institute of Liver Studies, Kings College Hospital  
34  
35  
36  
37  
38  
39  
40  
41  
42  
43  
44  
45  
46  
47  
48  
49  
50  
51  
52  
53  
54  
55  
56  
57  
58  
59  
60

**Faecal Microbiota Transplant (FMT) for recurrent or refractory *Clostridium difficile* Infection (CDI)**

**Donor screening questionnaire – Part 1**

**Name:**

**DOB:**

**Hospital number:**

**NHS number:**

**Contact details (preferably mobile):**

**Date of assessment:**

**Name / position of assessor:**

|                                                                        |                                                                                                                                                                                                                                                                                                                                                                                                                                                                                                                                                                                                                                                                                                                                                                                                                                                                                                          |
|------------------------------------------------------------------------|----------------------------------------------------------------------------------------------------------------------------------------------------------------------------------------------------------------------------------------------------------------------------------------------------------------------------------------------------------------------------------------------------------------------------------------------------------------------------------------------------------------------------------------------------------------------------------------------------------------------------------------------------------------------------------------------------------------------------------------------------------------------------------------------------------------------------------------------------------------------------------------------------------|
| Donor type                                                             | <input type="checkbox"/> Named donor<br><input type="checkbox"/> Anonymous donor                                                                                                                                                                                                                                                                                                                                                                                                                                                                                                                                                                                                                                                                                                                                                                                                                         |
| If Named donor, name and hospital number of recipient                  |                                                                                                                                                                                                                                                                                                                                                                                                                                                                                                                                                                                                                                                                                                                                                                                                                                                                                                          |
| If Named donor, relationship to recipient                              |                                                                                                                                                                                                                                                                                                                                                                                                                                                                                                                                                                                                                                                                                                                                                                                                                                                                                                          |
| If Named donor, does the recipient normally live in the same dwelling? | <input type="checkbox"/> Yes <input type="checkbox"/> No                                                                                                                                                                                                                                                                                                                                                                                                                                                                                                                                                                                                                                                                                                                                                                                                                                                 |
| Age                                                                    | Exclude if <18 or >60                                                                                                                                                                                                                                                                                                                                                                                                                                                                                                                                                                                                                                                                                                                                                                                                                                                                                    |
| Gender                                                                 | <input type="checkbox"/> Male <input type="checkbox"/> Female                                                                                                                                                                                                                                                                                                                                                                                                                                                                                                                                                                                                                                                                                                                                                                                                                                            |
| Ethnicity                                                              | <input type="checkbox"/> White - White British<br><input type="checkbox"/> White - White Irish<br><input type="checkbox"/> White - Other<br><input type="checkbox"/> Mixed race – White and Black Caribbean<br><input type="checkbox"/> Mixed race – White and Black African<br><input type="checkbox"/> Mixed race – White and Asian<br><input type="checkbox"/> Mixed race – Other<br><input type="checkbox"/> Asian or Asian British – Indian<br><input type="checkbox"/> Asian or Asian British – Bangladeshi<br><input type="checkbox"/> Asian or Asian British – Pakistani<br><input type="checkbox"/> Asian or Asian British – Other<br><input type="checkbox"/> Black or Black British – Caribbean<br><input type="checkbox"/> Black or Black British – African<br><input type="checkbox"/> Black or Black British – Other<br><input type="checkbox"/> Chinese<br><input type="checkbox"/> Other |
| Height cm                                                              |                                                                                                                                                                                                                                                                                                                                                                                                                                                                                                                                                                                                                                                                                                                                                                                                                                                                                                          |

|                                                                                              |                                                                       |                                                                                                                                                                                                                                                                                                                                                                                                                                                                                      |
|----------------------------------------------------------------------------------------------|-----------------------------------------------------------------------|--------------------------------------------------------------------------------------------------------------------------------------------------------------------------------------------------------------------------------------------------------------------------------------------------------------------------------------------------------------------------------------------------------------------------------------------------------------------------------------|
| 1<br>2<br>3<br>4                                                                             | Weight kg                                                             |                                                                                                                                                                                                                                                                                                                                                                                                                                                                                      |
| 5<br>6<br>7                                                                                  | BMI                                                                   |                                                                                                                                                                                                                                                                                                                                                                                                                                                                                      |
| 8<br>9<br>10                                                                                 | Has your weight changed by more than 5lb / 2kg in the past 6 months?  | Exclude if BMI>25<br><input type="checkbox"/> Yes <input type="checkbox"/> No                                                                                                                                                                                                                                                                                                                                                                                                        |
| 11<br>12<br>13<br>14<br>15<br>16<br>17<br>18<br>19<br>20<br>21<br>22<br>23<br>24<br>25<br>26 | Describe your diet (as many as apply):                                | Detail:<br><input type="checkbox"/> Omnivore<br><input type="checkbox"/> Vegetarian<br><input type="checkbox"/> Vegan<br><input type="checkbox"/> Kosher<br><input type="checkbox"/> Halal<br><input type="checkbox"/> Raw food only<br><input type="checkbox"/> Pescatarian<br><input type="checkbox"/> No red meat<br><input type="checkbox"/> Low carbohydrate<br><input type="checkbox"/> Lactose free<br><input type="checkbox"/> Gluten free<br><input type="checkbox"/> Other |
| 27<br>28<br>29<br>30<br>31                                                                   | How many portions of fruit and vegetables do you consume per day?     | <input type="checkbox"/> one or less<br><input type="checkbox"/> two to three<br><input type="checkbox"/> three to four<br><input type="checkbox"/> five to six<br><input type="checkbox"/> seven or more                                                                                                                                                                                                                                                                            |
| 32<br>33<br>34<br>35<br>36                                                                   | How many servings of cow, sheep or goats milk do you consume per day? | <input type="checkbox"/> one or less<br><input type="checkbox"/> two to three<br><input type="checkbox"/> three to four<br><input type="checkbox"/> five to six<br><input type="checkbox"/> seven or more                                                                                                                                                                                                                                                                            |
| 37<br>38                                                                                     | Alcohol – units/week                                                  |                                                                                                                                                                                                                                                                                                                                                                                                                                                                                      |
| 39<br>40                                                                                     | Smoking/day                                                           |                                                                                                                                                                                                                                                                                                                                                                                                                                                                                      |
| 41<br>42<br>43<br>44<br>45<br>46<br>47<br>48<br>49<br>50                                     | Normal bowel habit – average Bristol Stool Consistency                | <input type="checkbox"/> 1<br><input type="checkbox"/> 2<br><input type="checkbox"/> 3<br><input type="checkbox"/> 4<br><input type="checkbox"/> 5<br><input type="checkbox"/> 6<br><input type="checkbox"/> 7<br><br>Exclude if 6 or 7                                                                                                                                                                                                                                              |
| 51<br>52<br>53<br>54<br>55<br>56<br>57<br>58<br>59<br>60                                     | Normal bowel habit – average frequency                                | <input type="checkbox"/> >2/day<br><input type="checkbox"/> once to twice daily<br><input type="checkbox"/> once / 2 days<br><input type="checkbox"/> <once / 2 days<br><br>Exclude if active diarrhoea (>3 UBM/day for at least 2 consecutive days)                                                                                                                                                                                                                                 |

|                                              |                                                                                                                                                                                            |                                                                                                                                  |
|----------------------------------------------|--------------------------------------------------------------------------------------------------------------------------------------------------------------------------------------------|----------------------------------------------------------------------------------------------------------------------------------|
| 1<br>2<br>3<br>4<br>5<br>6<br>7              | During the past 7 days how many days were you physically active for a cumulative total of >60 mins/day?                                                                                    |                                                                                                                                  |
| 8<br>9<br>10<br>11                           | Have you ever been rejected as a blood donor/told not to donate?<br>If yes, why?                                                                                                           | <input type="checkbox"/> Yes <input type="checkbox"/> No<br><br>Exclude if YES                                                   |
| 12<br>13                                     | What is your country of birth?                                                                                                                                                             |                                                                                                                                  |
| 14<br>15<br>16                               | Have you ever resided in another country (other than UK) for >5 years?<br>If so which countries and when?                                                                                  | <input type="checkbox"/> Yes <input type="checkbox"/> No                                                                         |
| 17<br>18<br>19<br>20<br>21<br>22<br>23<br>24 | Do you currently have a profession that is associated with an increased risk of blood-borne transmissible diseases (e.g. daily contact with patients/inmates)?<br>If yes, what profession? | <input type="checkbox"/> Yes <input type="checkbox"/> No<br><br>Exclude if health/social care worker with direct patient contact |
| 25<br>26<br>27<br>28                         | Have you ever had a needle-stick or injury from a blood contaminated object from someone else? If yes, when and how was this follow up?                                                    | <input type="checkbox"/> Yes <input type="checkbox"/> No                                                                         |
| 29<br>30<br>31<br>32<br>33<br>34             | Have you ever injected yourself or been injected with illegal or non-prescribed drugs including body building drugs or cosmetics (even if this was only once or a long time ago?)          | <input type="checkbox"/> Yes <input type="checkbox"/> No<br><br>Exclude if YES                                                   |
| 35<br>36<br>37<br>38                         | Have you ever had a tattoo?<br>If yes, when and in which country was it performed?                                                                                                         | <input type="checkbox"/> Yes <input type="checkbox"/> No<br><br>Exclude if within past 4 months                                  |
| 39<br>40<br>41<br>42                         | Have you ever had a piercing?<br>If yes, when and in which country was it performed?                                                                                                       | <input type="checkbox"/> Yes <input type="checkbox"/> No<br><br>Exclude if within past 4 months                                  |
| 43<br>44<br>45<br>46<br>47                   | Have you ever had acupuncture?<br>If yes, when and in which country was it performed?                                                                                                      | <input type="checkbox"/> Yes <input type="checkbox"/> No<br><br>Exclude if within past 4 months                                  |
| 48<br>49<br>50<br>51<br>52                   | Have you ever had an operation or undergone clinical treatment in a hospital with poor hygienic conditions?<br>If yes, when and in which country was it performed?                         | <input type="checkbox"/> Yes <input type="checkbox"/> No                                                                         |
| 53<br>54<br>55<br>56<br>57                   | Have you ever had a rare infectious disease (e.g. tuberculosis, trypanosomiasis)?<br>If yes, when and which disease?                                                                       | <input type="checkbox"/> Yes <input type="checkbox"/> No                                                                         |
| 58<br>59<br>60                               | Have you ever been vaccinated against Hepatitis A or B?<br>If yes, which?                                                                                                                  | <input type="checkbox"/> Yes <input type="checkbox"/> No                                                                         |





|                                                                                                          |                                                                                                                                                                                                                                                                                                                                                                                                                                                                                                                                                              |                                                                                         |
|----------------------------------------------------------------------------------------------------------|--------------------------------------------------------------------------------------------------------------------------------------------------------------------------------------------------------------------------------------------------------------------------------------------------------------------------------------------------------------------------------------------------------------------------------------------------------------------------------------------------------------------------------------------------------------|-----------------------------------------------------------------------------------------|
| 1<br>2<br>3<br>4<br>5<br>6<br>7<br>8<br>9                                                                | Have you used any antibiotics in the last 3 months?                                                                                                                                                                                                                                                                                                                                                                                                                                                                                                          | <input type="checkbox"/> Yes <input type="checkbox"/> No<br>Exclude if Yes              |
| 10<br>11<br>12                                                                                           | Have you had a fever in the last 2 weeks?                                                                                                                                                                                                                                                                                                                                                                                                                                                                                                                    | <input type="checkbox"/> Yes <input type="checkbox"/> No<br>Exclude if Yes              |
| 13<br>14<br>15<br>16                                                                                     | Have you ever been incarcerated in prison?                                                                                                                                                                                                                                                                                                                                                                                                                                                                                                                   | <input type="checkbox"/> Yes <input type="checkbox"/> No<br>Exclude if in past 4 months |
| 17<br>18<br>19<br>20                                                                                     | Have you ever been immunosuppressed (e.g. during treatment for cancer, or for a solid organ transplant)?<br>If yes, when and why?                                                                                                                                                                                                                                                                                                                                                                                                                            | <input type="checkbox"/> Yes <input type="checkbox"/> No                                |
| 21<br>22<br>23                                                                                           | Have you ever had major gastrointestinal surgery?<br>If yes, when and why?                                                                                                                                                                                                                                                                                                                                                                                                                                                                                   | <input type="checkbox"/> Yes <input type="checkbox"/> No<br>Relative exclusion criteria |
| 24<br>25<br>26<br>27                                                                                     | Have you ever suffered from metabolic syndrome?                                                                                                                                                                                                                                                                                                                                                                                                                                                                                                              | <input type="checkbox"/> Yes <input type="checkbox"/> No<br>Relative exclusion criteria |
| 28<br>29<br>30<br>31                                                                                     | Have you ever suffered from any autoimmune condition (e.g. rheumatoid), asthma or eczema?<br>If yes, which, and do you take any treatment?                                                                                                                                                                                                                                                                                                                                                                                                                   | <input type="checkbox"/> Yes <input type="checkbox"/> No<br>Relative exclusion criteria |
| 32<br>33<br>34<br>35<br>36<br>37<br>38<br>39<br>40<br>41<br>42<br>43<br>44<br>45<br>46<br>47<br>48<br>49 | Have you ever had any chronic pain or fatigue syndromes?<br>If yes, which?                                                                                                                                                                                                                                                                                                                                                                                                                                                                                   | <input type="checkbox"/> Yes <input type="checkbox"/> No<br>Relative exclusion criteria |
| 50<br>51<br>52<br>53<br>54<br>55<br>56<br>57<br>58<br>59<br>60                                           | Have you any history of CJD or other prion disease in your family? If yes, please specify<br>Patients should be considered to be at risk from genetic forms of CJD if they have or have had<br><ol style="list-style-type: none"> <li>1. Genetic testing, which has indicated they are at significant risk of developing CJD or other prion disease</li> <li>2. A blood relative known to have a genetic mutation indicative of genetic CJD or other prion disease</li> <li>3. Two or more blood relatives affected by CJD or other prion disease</li> </ol> | <input type="checkbox"/> Yes <input type="checkbox"/> No                                |
|                                                                                                          | Have you ever received growth hormone or gonadotrophic treatment? If yes, please specify;<br>i) Whether the hormone was derived from human pituitary glands<br>ii) The year of the treatment<br>iii) Whether the treatment was received in the UK or in another country                                                                                                                                                                                                                                                                                      | <input type="checkbox"/> Yes <input type="checkbox"/> No                                |

|                                                                                                                                                                                                                                                                                                                                                                                                                                                                                    |                                                          |
|------------------------------------------------------------------------------------------------------------------------------------------------------------------------------------------------------------------------------------------------------------------------------------------------------------------------------------------------------------------------------------------------------------------------------------------------------------------------------------|----------------------------------------------------------|
| <p>Recipients of hormone derived from human pituitary glands eg growth hormone or gonadotrophin have been identified as potentially at risk of CJD. In the UK, the use of human growth hormone was stopped in 1985 but human-derived products may have been continued to be used in other countries. In the UK, the use of human-derived gonadotrophin was discontinued in 1973 but may have been continued in other countries after this time.</p>                                |                                                          |
| <p>Have you ever had surgery on your brain or spinal cord?<br/>People who underwent intradural neurosurgical or spinal procedures before August 1992 may have received a graft of human-derived dura mater and should be treated as at increased risk, unless evidence can be provided that human-derived dura mater was not used. Patients who received a graft of human-derived dura mater between 1980 and August 1992 are at increased risk of both sporadic CJD and vCJD.</p> | <input type="checkbox"/> Yes <input type="checkbox"/> No |
| <p>Are you normally resident in the UK?<br/>If No state country of usual residence</p>                                                                                                                                                                                                                                                                                                                                                                                             | <input type="checkbox"/> Yes <input type="checkbox"/> No |
| <p>Which countries have you visited in the last 12 months and what was the duration of stay?</p>                                                                                                                                                                                                                                                                                                                                                                                   |                                                          |
| <p>In the past 12 months have you been admitted to a hospital in a country other than the UK?<br/><br/>If yes state when and which countries</p>                                                                                                                                                                                                                                                                                                                                   | <input type="checkbox"/> Yes <input type="checkbox"/> No |
| <p>In the past 12 months have you been admitted to another hospital in London or Manchester?<br/><br/>If yes state when and which hospitals</p>                                                                                                                                                                                                                                                                                                                                    | <input type="checkbox"/> Yes <input type="checkbox"/> No |
| <p>List all current medications:</p>                                                                                                                                                                                                                                                                                                                                                                                                                                               |                                                          |

|  |                                                      |
|--|------------------------------------------------------|
|  | Exclude if any regular prescribed drugs (except OCP) |
|--|------------------------------------------------------|

|                                                                                   |                                                          |
|-----------------------------------------------------------------------------------|----------------------------------------------------------|
| Is patient eligible to donate?                                                    | <input type="checkbox"/> Yes <input type="checkbox"/> No |
| If No document reasons:                                                           |                                                          |
| If Yes proceed to screening tests<br>Ensure consent for testing documented        |                                                          |
| Sign and date (health care practitioner) to indicate patient has provided consent |                                                          |

| Obtain serology for:                       | Requested?                   |
|--------------------------------------------|------------------------------|
| HIV antigen/antibody                       | <input type="checkbox"/> Yes |
| HTLV-1/HTLV-II antibodies                  | <input type="checkbox"/> Yes |
| Hepatitis A IgG (add on IgM if positive)   | <input type="checkbox"/> Yes |
| Hepatitis B surface antigen                | <input type="checkbox"/> Yes |
| Hepatitis C IgG                            | <input type="checkbox"/> Yes |
| Syphilis serology (T. pallidum antibodies) | <input type="checkbox"/> Yes |
| CMV IgG (add on IgM if positive)           | <input type="checkbox"/> Yes |
| EBV Serology                               | <input type="checkbox"/> Yes |
| Strongyloides serology                     | <input type="checkbox"/> Yes |

Provide stool sample collection pots and request forms x3 for patient to take home. Instruct patient to provide three separate samples over 2-3 days, ensuring the pot is filled halfway in order to complete all testing.

| Stool testing for:                                                        | Requested?                   |
|---------------------------------------------------------------------------|------------------------------|
| Bacterial culture (Campylobacter, Salmonella, Shigella, E. coli O:157) x3 | <input type="checkbox"/> Yes |
| Ova, Cysts and Parasites x3                                               | <input type="checkbox"/> Yes |
| C. difficile                                                              | <input type="checkbox"/> Yes |
| Resistant Gram negative organism screen                                   | <input type="checkbox"/> Yes |
| MRSA screen                                                               | <input type="checkbox"/> Yes |
| Helicobacter pylori stool antigen                                         | <input type="checkbox"/> Yes |
| E. histolytica PCR (not orderable on PCR)                                 |                              |

Arrange follow up visit for a minimum of 2-3 weeks time

Follow-up visit

| Serology results:    | Result                                                                  |
|----------------------|-------------------------------------------------------------------------|
| HIV antigen/antibody | <input type="checkbox"/> Detected <input type="checkbox"/> Not detected |

|                                            |                                                                         |
|--------------------------------------------|-------------------------------------------------------------------------|
| HTLV-1/HTLV-II antibodies                  | <input type="checkbox"/> Detected <input type="checkbox"/> Not detected |
| Hepatitis A IgG (add on IgM if positive)   | <input type="checkbox"/> Detected <input type="checkbox"/> Not detected |
| Hepatitis B surface antigen                | <input type="checkbox"/> Detected <input type="checkbox"/> Not detected |
| Hepatitis C IgG                            | <input type="checkbox"/> Detected <input type="checkbox"/> Not detected |
| Syphilis serology (T. pallidum antibodies) | <input type="checkbox"/> Detected <input type="checkbox"/> Not detected |
| CMV IgG (add on IgM if positive)           | <input type="checkbox"/> Detected <input type="checkbox"/> Not detected |
| EBV Serology                               | <input type="checkbox"/> Detected <input type="checkbox"/> Not detected |
| Strongyloides serology                     | <input type="checkbox"/> Detected <input type="checkbox"/> Not detected |

| Stool results:                                                            | Result                                                                  |
|---------------------------------------------------------------------------|-------------------------------------------------------------------------|
| Bacterial culture (Campylobacter, Salmonella, Shigella, E. coli O:157) x3 | <input type="checkbox"/> Detected <input type="checkbox"/> Not detected |
| Ova, Cysts and Parasites x3                                               | <input type="checkbox"/> Detected <input type="checkbox"/> Not detected |
| C. difficile                                                              | <input type="checkbox"/> Detected <input type="checkbox"/> Not detected |
| Resistant Gram negative organism screen                                   | <input type="checkbox"/> Detected <input type="checkbox"/> Not detected |
| MRSA screen                                                               | <input type="checkbox"/> Detected <input type="checkbox"/> Not detected |
| Helicobacter pylori stool antigen                                         | <input type="checkbox"/> Detected <input type="checkbox"/> Not detected |
| E. histolytica PCR (not orderable on PCR)                                 | <input type="checkbox"/> Detected <input type="checkbox"/> Not detected |

|                            |                                                          |
|----------------------------|----------------------------------------------------------|
| Is all testing complete?   | <input type="checkbox"/> Yes <input type="checkbox"/> No |
| Accept as donor?           | <input type="checkbox"/> Yes <input type="checkbox"/> No |
| Any referrals required     | <input type="checkbox"/> Yes <input type="checkbox"/> No |
| Details of referrals made: |                                                          |

Provide donor with stool collection kit x2 (contains collection instructions and copy of patient screening questionnaire 2). Explain requirement for stool to be fully processed within 6 hours of production.

The donor may provide multiple donations, but screening questionnaire 2 **MUST** be completed with **EACH** donation

If yes to any question, must undergo repeat full screening (however samples may be banked and quarantined for release after repeat testing).

If No to all questions samples may be released immediately and donor may continue to provide unlimited donations for 3 months after which time repeated screening will be required.

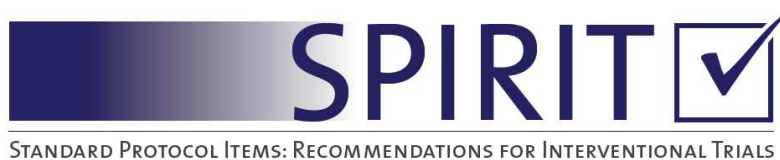

SPIRIT 2013 Checklist: Recommended items to address in a clinical trial protocol and related documents\*

| Section/item                      | Item No | Description                                                                                                                                                                                                                                                                                  |
|-----------------------------------|---------|----------------------------------------------------------------------------------------------------------------------------------------------------------------------------------------------------------------------------------------------------------------------------------------------|
| <b>Administrative information</b> |         |                                                                                                                                                                                                                                                                                              |
| Title                             | 1       | Descriptive title identifying the study design, population, interventions, and, if applicable, trial acronym (Page 1)                                                                                                                                                                        |
| Trial registration                | 2a      | Trial identifier and registry name. If not yet registered, name of intended registry (Page 1)                                                                                                                                                                                                |
|                                   | 2b      | All items from the World Health Organization Trial Registration Data Set                                                                                                                                                                                                                     |
| Protocol version                  | 3       | Date and version identifier (Page 1)                                                                                                                                                                                                                                                         |
| Funding                           | 4       | Sources and types of financial, material, and other support (Pages 9, 47)                                                                                                                                                                                                                    |
| Roles and responsibilities        | 5a      | Names, affiliations, and roles of protocol contributors (Pages 2-4)                                                                                                                                                                                                                          |
|                                   | 5b      | Name and contact information for the trial sponsor (Pages 3-4)                                                                                                                                                                                                                               |
|                                   | 5c      | Role of study sponsor and funders, if any, in study design; collection, management, analysis, and interpretation of data; writing of the report; and the decision to submit the report for publication, including whether they will have ultimate authority over any of these activities N/A |
|                                   | 5d      | Composition, roles, and responsibilities of the coordinating centre, steering committee, endpoint adjudication committee, data management team, and other individuals or groups overseeing the trial, if applicable (see Item 21a for data monitoring committee) (Page 47)                   |
| <b>Introduction</b>               |         |                                                                                                                                                                                                                                                                                              |
| Background and rationale          | 6a      | Description of research question and justification for undertaking the trial, including summary of relevant studies (published and unpublished) examining benefits and harms for each intervention (Pages 17-20)                                                                             |
|                                   | 6b      | Explanation for choice of comparators (Pages 17-20)                                                                                                                                                                                                                                          |
| Objectives                        | 7       | Specific objectives or hypotheses (Pages 21-22)                                                                                                                                                                                                                                              |

1  
2  
3  
4  
5  
6  
7  
8  
9  
10  
11  
12  
13  
14  
15  
16  
17  
18  
19  
20  
21  
22  
23  
24  
25  
26  
27  
28  
29  
30  
31  
32  
33  
34  
35  
36  
37  
38  
39  
40  
41  
42  
43  
44  
45  
46  
47  
48  
49  
50  
51  
52  
53  
54  
55  
56  
57  
58  
59  
60

Trial design 8 Description of trial design including type of trial (eg, parallel group, crossover, factorial, single group), allocation ratio, and framework (eg, superiority, equivalence, noninferiority, exploratory) (Pages 23-25)

### Methods: Participants, interventions, and outcomes

Study setting 9 Description of study settings (eg, community clinic, academic hospital) and list of countries where data will be collected. Reference to where list of study sites can be obtained (Page 23)

Eligibility criteria 10 Inclusion and exclusion criteria for participants. If applicable, eligibility criteria for study centres and individuals who will perform the interventions (eg, surgeons, psychotherapists) (Page 12, Page 29)

Interventions 11a Interventions for each group with sufficient detail to allow replication, including how and when they will be administered (Pages 32-36)

11b Criteria for discontinuing or modifying allocated interventions for a given trial participant (eg, drug dose change in response to harms, participant request, or improving/worsening disease) (Pages 15-16, 36-39)

11c Strategies to improve adherence to intervention protocols, and any procedures for monitoring adherence (eg, drug tablet return, laboratory tests) (N/A, single treatment administered by clinical trials team)

11d Relevant concomitant care and interventions that are permitted or prohibited during the trial (Pages 29-31)

Outcomes 12 Primary, secondary, and other outcomes, including the specific measurement variable (eg, systolic blood pressure), analysis metric (eg, change from baseline, final value, time to event), method of aggregation (eg, median, proportion), and time point for each outcome. Explanation of the clinical relevance of chosen efficacy and harm outcomes is strongly recommended (Pages 10-11, 21-22)

Participant timeline 13 Time schedule of enrolment, interventions (including any run-ins and washouts), assessments, and visits for participants. A schematic diagram is highly recommended (see Figure) (Pages 24-28)

Sample size 14 Estimated number of participants needed to achieve study objectives and how it was determined, including clinical and statistical assumptions supporting any sample size calculations (Pages 45-46)

Recruitment 15 Strategies for achieving adequate participant enrolment to reach target sample size (Pages 23, 25)

### Methods: Assignment of interventions (for controlled trials)

Allocation:

|    |                |     |                                                                           |
|----|----------------|-----|---------------------------------------------------------------------------|
| 1  |                |     |                                                                           |
| 2  | Sequence       | 16a | Method of generating the allocation sequence (eg, computer-               |
| 3  | generation     |     | generated random numbers), and list of any factors for stratification.    |
| 4  |                |     | To reduce predictability of a random sequence, details of any planned     |
| 5  |                |     | restriction (eg, blocking) should be provided in a separate document      |
| 6  |                |     | that is unavailable to those who enrol participants or assign             |
| 7  |                |     | interventions (Page 31)                                                   |
| 8  |                |     |                                                                           |
| 9  | Allocation     | 16b | Mechanism of implementing the allocation sequence (eg, central            |
| 10 | concealment    |     | telephone; sequentially numbered, opaque, sealed envelopes),              |
| 11 | mechanism      |     | describing any steps to conceal the sequence until interventions are      |
| 12 |                |     | assigned (Page 31, single blinded so only the patient is blinded)         |
| 13 |                |     |                                                                           |
| 14 | Implementation | 16c | Who will generate the allocation sequence, who will enrol participants,   |
| 15 |                |     | and who will assign participants to interventions (Trials Nurse, Chief    |
| 16 |                |     | Investigator or Clinical Research Fellow using randomisation              |
| 17 |                |     | software)                                                                 |
| 18 |                |     |                                                                           |
| 19 |                |     |                                                                           |
| 20 | Blinding       | 17a | Who will be blinded after assignment to interventions (eg, trial          |
| 21 | (masking)      |     | participants, care providers, outcome assessors, data analysts), and      |
| 22 |                |     | how (Patient is blinded to treatment allocation as is trial statistician, |
| 23 |                |     | database constructed so as not to reveal treatment allocation)            |
| 24 |                |     |                                                                           |
| 25 |                | 17b | If blinded, circumstances under which unblinding is permissible, and      |
| 26 |                |     | procedure for revealing a participant's allocated intervention during     |
| 27 |                |     | the trial (N/A)                                                           |
| 28 |                |     |                                                                           |
| 29 |                |     |                                                                           |

### Methods: Data collection, management, and analysis

|    |                 |     |                                                                          |
|----|-----------------|-----|--------------------------------------------------------------------------|
| 30 |                 |     |                                                                          |
| 31 | Data collection | 18a | Plans for assessment and collection of outcome, baseline, and other      |
| 32 | methods         |     | trial data, including any related processes to promote data quality (eg, |
| 33 |                 |     | duplicate measurements, training of assessors) and a description of      |
| 34 |                 |     | study instruments (eg, questionnaires, laboratory tests) along with      |
| 35 |                 |     | their reliability and validity, if known. Reference to where data        |
| 36 |                 |     | collection forms can be found, if not in the protocol                    |
| 37 |                 |     |                                                                          |
| 38 |                 |     |                                                                          |
| 39 |                 | 18b | Plans to promote participant retention and complete follow-up,           |
| 40 |                 |     | including list of any outcome data to be collected for participants who  |
| 41 |                 |     | discontinue or deviate from intervention protocols                       |
| 42 |                 |     |                                                                          |
| 43 | Data            | 19  | Plans for data entry, coding, security, and storage, including any       |
| 44 | management      |     | related processes to promote data quality (eg, double data entry;        |
| 45 |                 |     | range checks for data values). Reference to where details of data        |
| 46 |                 |     | management procedures can be found, if not in the protocol (Page 43)     |
| 47 |                 |     |                                                                          |
| 48 | Statistical     | 20a | Statistical methods for analysing primary and secondary outcomes.        |
| 49 | methods         |     | Reference to where other details of the statistical analysis plan can be |
| 50 |                 |     | found, if not in the protocol (Pages 45-46)                              |
| 51 |                 |     |                                                                          |
| 52 |                 | 20b | Methods for any additional analyses (eg, subgroup and adjusted           |
| 53 |                 |     | analyses) (To be confirmed)                                              |
| 54 |                 |     |                                                                          |
| 55 |                 |     |                                                                          |
| 56 |                 |     |                                                                          |
| 57 |                 |     |                                                                          |
| 58 |                 |     |                                                                          |
| 59 |                 |     |                                                                          |
| 60 |                 |     |                                                                          |



1  
2  
3  
4  
5  
6  
7  
8  
9  
10  
11  
12  
13  
14  
15  
16  
17  
18  
19  
20  
21  
22  
23  
24  
25  
26  
27  
28  
29  
30  
31  
32  
33  
34  
35  
36  
37  
38  
39  
40  
41  
42  
43  
44  
45  
46  
47  
48  
49  
50  
51  
52  
53  
54  
55  
56  
57  
58  
59  
60

20c Definition of analysis population relating to protocol non-adherence (eg, as randomised analysis), and any statistical methods to handle missing data (eg, multiple imputation) (Pages 45-46)

### Methods: Monitoring

Data monitoring 21a Composition of data monitoring committee (DMC); summary of its role and reporting structure; statement of whether it is independent from the sponsor and competing interests; and reference to where further details about its charter can be found, if not in the protocol. Alternatively, an explanation of why a DMC is not needed (Page 47)

21b Description of any interim analyses and stopping guidelines, including who will have access to these interim results and make the final decision to terminate the trial (Pages 39-40, 47)

Harms 22 Plans for collecting, assessing, reporting, and managing solicited and spontaneously reported adverse events and other unintended effects of trial interventions or trial conduct (Pages 36-38)

Auditing 23 Frequency and procedures for auditing trial conduct, if any, and whether the process will be independent from investigators and the sponsor (Pages 14, 43-44)

### Ethics and dissemination

Research ethics approval 24 Plans for seeking research ethics committee/institutional review board (REC/IRB) approval (Page 14) Research Ethics approval was given by the London South East Research Ethics committee (ref 17/LO/2081)

Protocol amendments 25 Plans for communicating important protocol modifications (eg, changes to eligibility criteria, outcomes, analyses) to relevant parties (eg, investigators, REC/IRBs, trial participants, trial registries, journals, regulators) Direct communication with REC and involvement of DMC and TSC as required

Consent or assent 26a Who will obtain informed consent or assent from potential trial participants or authorised surrogates, and how (see Item 32) (Pages 14-16)

26b Additional consent provisions for collection and use of participant data and biological specimens in ancillary studies, if applicable (N/A)

Confidentiality 27 How personal information about potential and enrolled participants will be collected, shared, and maintained in order to protect confidentiality before, during, and after the trial (Pages 15, 23, 31, 43, 44)

Declaration of interests 28 Financial and other competing interests for principal investigators for the overall trial and each study site N/A

|    |                               |     |                                                                                                                                                                                                                                                                                               |
|----|-------------------------------|-----|-----------------------------------------------------------------------------------------------------------------------------------------------------------------------------------------------------------------------------------------------------------------------------------------------|
| 1  | Access to data                | 29  | Statement of who will have access to the final trial dataset, and disclosure of contractual agreements that limit such access for investigators (Page 43)                                                                                                                                     |
| 2  |                               |     |                                                                                                                                                                                                                                                                                               |
| 3  |                               |     |                                                                                                                                                                                                                                                                                               |
| 4  |                               |     |                                                                                                                                                                                                                                                                                               |
| 5  | Ancillary and post-trial care | 30  | Provisions, if any, for ancillary and post-trial care, and for compensation to those who suffer harm from trial participation (Information in PIS)                                                                                                                                            |
| 6  |                               |     |                                                                                                                                                                                                                                                                                               |
| 7  |                               |     |                                                                                                                                                                                                                                                                                               |
| 8  |                               |     |                                                                                                                                                                                                                                                                                               |
| 9  |                               |     |                                                                                                                                                                                                                                                                                               |
| 10 | Dissemination policy          | 31a | Plans for investigators and sponsor to communicate trial results to participants, healthcare professionals, the public, and other relevant groups (eg, via publication, reporting in results databases, or other data sharing arrangements), including any publication restrictions (Page 47) |
| 11 |                               |     |                                                                                                                                                                                                                                                                                               |
| 12 |                               |     |                                                                                                                                                                                                                                                                                               |
| 13 |                               |     |                                                                                                                                                                                                                                                                                               |
| 14 |                               |     |                                                                                                                                                                                                                                                                                               |
| 15 |                               |     |                                                                                                                                                                                                                                                                                               |
| 16 |                               | 31b | Authorship eligibility guidelines and any intended use of professional writers N/A                                                                                                                                                                                                            |
| 17 |                               |     |                                                                                                                                                                                                                                                                                               |
| 18 |                               |     |                                                                                                                                                                                                                                                                                               |
| 19 |                               | 31c | Plans, if any, for granting public access to the full protocol, participant-level dataset, and statistical code (Page 47)                                                                                                                                                                     |
| 20 |                               |     |                                                                                                                                                                                                                                                                                               |
| 21 |                               |     |                                                                                                                                                                                                                                                                                               |
| 22 |                               |     |                                                                                                                                                                                                                                                                                               |
| 23 | <b>Appendices</b>             |     |                                                                                                                                                                                                                                                                                               |
| 24 | Informed consent materials    | 32  | Model consent form and other related documentation given to participants and authorised surrogates                                                                                                                                                                                            |
| 25 |                               |     |                                                                                                                                                                                                                                                                                               |
| 26 |                               |     |                                                                                                                                                                                                                                                                                               |
| 27 | Biological specimens          | 33  | Plans for collection, laboratory evaluation, and storage of biological specimens for genetic or molecular analysis in the current trial and for future use in ancillary studies, if applicable                                                                                                |
| 28 |                               |     |                                                                                                                                                                                                                                                                                               |
| 29 |                               |     |                                                                                                                                                                                                                                                                                               |
| 30 |                               |     |                                                                                                                                                                                                                                                                                               |

---

\*It is strongly recommended that this checklist be read in conjunction with the SPIRIT 2013 Explanation & Elaboration for important clarification on the items. Amendments to the protocol should be tracked and dated. The SPIRIT checklist is copyrighted by the SPIRIT Group under the Creative Commons "[Attribution-NonCommercial-NoDerivs 3.0 Unported](https://creativecommons.org/licenses/by-nc-nd/3.0/)" license.

# BMJ Open

## **PROFIT: A PROspective, randomised placebo controlled feasibility trial of Faecal mIcrobiota Transplantation in cirrhosis: study protocol for a single-blinded trial**

|                                 |                                                                                                                                                                                                                                                                                                                                                                                                                                                                                                                                                                                                                                                                                                                                                                                                                                                          |
|---------------------------------|----------------------------------------------------------------------------------------------------------------------------------------------------------------------------------------------------------------------------------------------------------------------------------------------------------------------------------------------------------------------------------------------------------------------------------------------------------------------------------------------------------------------------------------------------------------------------------------------------------------------------------------------------------------------------------------------------------------------------------------------------------------------------------------------------------------------------------------------------------|
| Journal:                        | <i>BMJ Open</i>                                                                                                                                                                                                                                                                                                                                                                                                                                                                                                                                                                                                                                                                                                                                                                                                                                          |
| Manuscript ID                   | bmjopen-2018-023518.R2                                                                                                                                                                                                                                                                                                                                                                                                                                                                                                                                                                                                                                                                                                                                                                                                                                   |
| Article Type:                   | Protocol                                                                                                                                                                                                                                                                                                                                                                                                                                                                                                                                                                                                                                                                                                                                                                                                                                                 |
| Date Submitted by the Author:   | 26-Nov-2018                                                                                                                                                                                                                                                                                                                                                                                                                                                                                                                                                                                                                                                                                                                                                                                                                                              |
| Complete List of Authors:       | Woodhouse, Charlotte; King's College London, Hepatology<br>Patel, Vishal; Kings College London, Hepatology<br>Goldenberg, Simon; Guy's & St. Thomas' NHS Foundation Trust and King's College,<br>Sanchez Fueyo, Alberto; Kings College London, Hepatology<br>China, Louise; UCL, Division of Medicine<br>O'Brien, Alastair; UCL, Division of Medicine<br>Flach, Clare; 1. School of Population Health & Environmental Sciences, Faculty of Life Sciences & Medicine, King's College London<br>Douriri, Abdel; 1. School of Population Health & Environmental Sciences, Faculty of Life Sciences & Medicine, King's College London<br>Shawcross, Debbie ; Kings College London, Liver Sciences, 1st Floor JBC, School of Immunology & Microbial Sciences Faculty of Life Sciences & Medicine, King's College London, Denmark Hill Campus, London, SE5 9RS |
| <b>Primary Subject Heading</b>: | Gastroenterology and hepatology                                                                                                                                                                                                                                                                                                                                                                                                                                                                                                                                                                                                                                                                                                                                                                                                                          |
| Secondary Subject Heading:      | Pharmacology and therapeutics                                                                                                                                                                                                                                                                                                                                                                                                                                                                                                                                                                                                                                                                                                                                                                                                                            |
| Keywords:                       | cirrhosis, faecal microbiota transplantation, gut microbiota, feasibility                                                                                                                                                                                                                                                                                                                                                                                                                                                                                                                                                                                                                                                                                                                                                                                |
|                                 |                                                                                                                                                                                                                                                                                                                                                                                                                                                                                                                                                                                                                                                                                                                                                                                                                                                          |

SCHOLARONE™  
Manuscripts

1  
2  
3 **PROFIT: A PROspective, randomised placebo controlled feasibility trial of Faecal**  
4 **microbiota Transplantation in cirrhosis: study protocol for a single-blinded trial**  
5  
6  
7

8 **C. Woodhouse<sup>1</sup>, V. Patel<sup>1</sup>, S. Goldenberg<sup>2</sup>, A. Sanchez-Fueyo<sup>1</sup>, L. China<sup>3</sup>, A. O'Brien<sup>3</sup>, C.**  
9 **Flach<sup>4</sup>, A. Douiri<sup>4</sup>, D. Shawcross<sup>1</sup>**  
10

- 11  
12 **1. Liver Sciences, 1<sup>st</sup> Floor James Black Centre, School of Immunology & Microbial**  
13 **Sciences, Faculty of Life Sciences & Medicine, King's College London, Denmark Hill**  
14 **Campus, London, SE5 9RS**  
15  
16 **2. Directorate of Infection, Guy's and St Thomas' NHS Foundation Trust, London**  
17  
18 **3. Division of Medicine, University College London (UCL), London**  
19  
20 **4. School of Population Health & Environmental Sciences, Faculty of Life Sciences &**  
21 **Medicine, King's College London**  
22

23 **Corresponding author: Dr Charlotte Woodhouse, Liver Sciences, 1<sup>st</sup> Floor James Black**  
24 **Centre, School of Immunology & Microbial Sciences, Faculty of Life Sciences & Medicine,**  
25 **King's College London, Denmark Hill Campus SE5 9RS [charlottewoodhouse@nhs.net](mailto:charlottewoodhouse@nhs.net) Tel**  
26 **02032993713 Fax: 020232993899**  
27  
28

29  
30  
31 **Abstract**  
32

33 **Introduction**  
34

35 Patients with advanced cirrhosis have enteric bacterial dysbiosis and translocation of  
36 bacteria and their products across the gut epithelial barrier. This culminates in systemic  
37 inflammation and endotoxemia, inducing innate immune dysfunction which predisposes to  
38 infection, and development of complications such as bleeding, sepsis and hepatic  
39 encephalopathy (HE). This feasibility study aims to assess the safety of administering faecal  
40 microbiota transplant to patients with cirrhosis and explore the effect of the intervention on  
41 their prognosis by achieving restoration of a healthy gut microbiome.  
42  
43  
44

45 **Methods and Analysis**  
46

47 PROFIT is a single-centre, randomized, single-blinded, placebo-controlled study evaluating  
48 Faecal Microbiota Transplantation (FMT) against placebo. Patients with advanced but stable  
49 cirrhosis with a MELD score between 10 and 16 will be recruited. Twenty-four patients will  
50 be randomized to FMT plus standard of care (as per our institutional practice) and eight  
51 patients to placebo in a ratio of 3:1. Patients will be evaluated at baseline before the study  
52 intervention is administered and at 7, 30 and 90 days post intervention to assess safety and  
53 adverse events. FMT/placebo will be administered into the jejunum within 7 days of  
54 baseline.  
55  
56  
57

58 The primary outcome measure will be safety and feasibility as assessed by recruitment  
59 rates, tolerability and safety of FMT treatment. Results will be disseminated via peer  
60

1  
2  
3 reviewed journals and international conferences. The recruitment of the first patient  
4 occurred on 23/05/2018.  
5

### 6 7 **Ethics and dissemination**

8 Research Ethics approval was given by the London South East Research Ethics committee  
9 (ref 17/LO/2081). The study has been registered with *ClinicalTrials.gov*– reference number:  
10 NCT02862249. The trial is registered with the European Medicines Agency (EudraCT 2017-  
11 003629-13) and has been adopted by the NIHR (IRAS 197237). This manuscript refers to the  
12 version 2.0 of the protocol; pre-results.  
13  
14

### 15 16 **Strengths and limitations of this study**

- 17 • This study is powered to assess feasibility and safety of administering FMT to  
18 patients with cirrhosis, however it is not statistically powered to assess for clinically  
19 relevant outcomes.
- 20 • This is the first study examining the effect of FMT delivered directly into the small  
21 bowel in patients with advanced cirrhosis. This trial does not involve antibiotic pre-  
22 treatment in the FMT group, as has been undertaken in the USA in patients with HE.
- 23 • PROFIT will assess instillation of FMT/placebo directly into the small bowel, as  
24 opposed to the colon-, directly targetting small bowel bacterial overgrowth that is  
25 observed in cirrhosis
- 26 • A limitation of the study is its single-blinded design, which was necessary as the FMT  
27 and placebo (saline with glycerol) are not matched.  
28  
29  
30  
31  
32  
33

### 34 35 **Introduction**

36 Patients with advanced cirrhosis have enteric dysbiosis with small bowel bacterial overgrowth  
37 and translocation of bacteria and their products across the gut epithelial barrier (1). This  
38 culminates in systemic inflammation and endotoxaemia, inducing innate immune dysfunction  
39 which predisposes to infection (2), and development of complications such as bleeding, sepsis  
40 and hepatic encephalopathy (3). It also plays a key role in the natural history of cirrhosis by  
41 influencing the rate of progression to advanced liver disease and terminal liver failure (4).  
42  
43

44  
45 Utilising quantitative metagenomics our group has found 75,245 genes differentially  
46 expressed between patients with cirrhosis and healthy individuals. Over 50% of these  
47 bacterial species are of buccal origin suggesting an invasion of the gut from the mouth in  
48 cirrhosis (5). Patients with cirrhosis also have salivary dysbiosis associated with impaired  
49 salivary defenses and systemic inflammation. Salivary dysbiosis has been shown to be greater  
50 in patients with cirrhosis who developed complications necessitating hospitalisation within  
51 90 days. Modulating the gut microbiota in patients with cirrhosis with the non-absorbable  
52 antibiotic rifaximin has been associated with improved cognitive performance and reduction  
53 in endotoxaemia in patients with cirrhosis (6, 7). Moreover, we have recently performed a  
54 multi-centre retrospective study including 170 patients in which rifaximin- $\alpha$  therapy given for  
55 90 days significantly (i) reduced hospital re-admission rates after 3 months treatment,  
56 impacting significantly on the NHS resource burden and (ii) reduced overall liver disease  
57 severity (as measured by the Child Pugh and Model for End Stage Liver Disease scores) raising  
58  
59  
60

1  
2  
3 the possibility that modulation of gut microbiota may significantly modify the natural history  
4 of chronic liver failure (8).  
5

6  
7 These data constitute in our view “proof of principle” that modifying the gut microbiota in  
8 patients with cirrhosis improves clinical outcomes. Rifaximin- $\alpha$  was approved by NICE for the  
9 prevention of the recurrence of overt hepatic encephalopathy in cirrhosis (9) but considerable  
10 concern remains regarding whether long term antibiotic prescription will result in a change  
11 in bacterial function and virulence rather than a simple reduction in bacterial population and  
12 whether this may drive bacterial resistance to antibiotics in an already functionally  
13 immunocompromised population. The question was therefore raised as to whether directly,  
14 as opposed to indirectly modulating the gut microbiota utilising faeces from healthy donors  
15 may be a safer and more durable therapy. Faecal microbiota transplantation (FMT) has been  
16 licensed by NICE since 2014 for the treatment of recurrent *Clostridium difficile* infection (10).  
17 FMT has shown promising results in clinical trials of several disease states resulting from gut  
18 dysbiosis beyond *Clostridium difficile* infection (10) for example in ulcerative colitis (11-14).  
19  
20  
21

22  
23 We hypothesise that in patients with advanced cirrhosis, FMT may reduce the progression to  
24 chronic liver failure including the development of jaundice, ascites, bleeding,  
25 encephalopathy, infection and organ dysfunction. Whether FMT is feasible in the setting of  
26 cirrhosis remains to be investigated. We propose conducting a feasibility trial to determine  
27 whether FMT from a healthy donor will alleviate gut dysbiosis and immune dysfunction in  
28 advanced cirrhosis.  
29  
30  
31

## 32 **Methods and Analysis**

### 33 **Primary Objectives:**

34  
35 The primary objective of this study will be to assess whether stabilising gut dysbiosis with FMT  
36 in patients with advanced cirrhosis is both feasible and safe.  
37  
38  
39

### 40 **Primary Endpoints:**

41  
42 The primary endpoints of the study will be twofold. To assess the feasibility of FMT as  
43 determined by the recruitment rates (including acceptability of the intervention) and  
44 tolerability of FMT e.g. gastro-oesophageal reflux rates. The second primary outcome  
45 measure will be to assess the safety of FMT administration, including the incidence of any  
46 transmissible bacterial or viral infection that is deemed to have been acquired from the donor  
47 including *Clostridium difficile* infection.  
48  
49  
50

### 51 **Secondary Objectives:**

52  
53 The secondary objectives of the study are to provide preliminary evidence of efficacy for a  
54 larger randomised trial, with the purpose of choosing the optimal primary outcome, and  
55 estimating the parameters for sample size calculation. We will also collect blood, stool and  
56 urine samples from participants to assess the stability of the transplanted gut microbiome by  
57  
58  
59  
60

1  
2  
3 comparing the percentage composition of the stool microbiota on day 7, 30 and 90 with the  
4 donor microbiome. Plasma endotoxin (and endotoxin binding protein), pro- and anti-  
5 inflammatory cytokine levels, bacterial DNA quantification and serum procalcitonin will be  
6 performed at 7, 30 and 90 days as will changes in faecal biomarkers (calprotectin, lactoferrin  
7 and M2-Pyruvate Kinase).  
8  
9

## 10 **Trial Design**

11  
12  
13 PROFIT is a single-centre study. Thirty-two patients will be recruited from out-patient clinics  
14 at King's College Hospital (KCH) or from suitable inpatients on the wards. The patients will be  
15 recruited as per the inclusion and exclusion criteria listed in table 1. Patients will be  
16 randomized in a single-blinded fashion in a ratio of 3:1 FMT to placebo. Patients will be  
17 unaware of the intervention given, but investigators will not be blinded to the treatment  
18 intervention.  
19  
20

## 21 **Patient and Public Involvement**

22  
23  
24 A lay reviewer/patient representative at the NIHR reviewed the protocol. This was funded by  
25 the Research for Patient Benefit programme. Feedback was taken on board and revisions  
26 were subsequently made.  
27  
28

29 The British Liver Trust, British Society of Gastroenterology Liver Research Group and King's  
30 Liver Outpatient Advisory Group (patient group) were all involved in the study set-up and  
31 protocol development at all stages.  
32

33  
34 Results will be disseminated to study participants via the Liver Research Nurse if they indicate  
35 an interest in the study outcome.  
36  
37  
38  
39

40 *Table 1- Inclusion and exclusion criteria*

### 41 **Inclusion Criteria**

- 42 • 18–75 years
  - 43 • Confirmed advanced cirrhosis of any aetiology with a MELD (15) score between 10 and  
44 16. The diagnosis of cirrhosis will be based on clinical, radiological, or histological  
45 criteria.
  - 46 • Patients with alcohol-related liver disease must have been abstinent from alcohol for a  
47 minimum of 6 weeks.
  - 48 • Patients must be deemed to have capacity to consent to the study.
- 49  
50  
51  
52  
53  
54  
55  
56  
57  
58  
59  
60

### Exclusion Criteria

- Severe or life-threatening food allergy
- Pregnancy or breastfeeding
- Patients treated for active variceal bleeding, infection, bacterial peritonitis, overt hepatic encephalopathy or acute-on-chronic liver failure within the past 14 days.
- Patients who have received antibiotics in the past 14 days.
- Active alcohol consumption of >20 grams/day.
- Has had a previous liver transplant
- Hepatocellular carcinoma outside of the Milan Criteria (16)
- Inflammatory bowel disease
- Coeliac disease
- A history of prior gastrointestinal resection such as gastric bypass
- Patient is not expected to survive the duration of the study (90 days).
- Severe renal impairment (creatinine >150 µmol/L)
- HIV positive
- Immunosuppression e.g. more than two weeks treatment with corticosteroids within 8 weeks of intervention, active treatment with tacrolimus, mycophenylate, azathioprine.

### Patient Population

The study will include all patients aged 18 to 75 years with capacity to consent and a diagnosis of cirrhosis. Patients will have a MELD (15) score of between 10 and 16. The diagnosis of cirrhosis may be based on radiological, clinical or histological parameters. In the case of alcohol-related cirrhosis, patients must have been abstinent for a minimum of six weeks. The exclusion criteria are outlined in table 1. Anticipated recruitment is outlined in Figure 1 below (17).

### Consent

All participants will be asked to provide informed consent after having had the opportunity to discuss the trial with the clinician, their family and friends and having read the patient information sheet (PIS- see supplementary file.) Patients who lack capacity will not be enrolled in this study. If patients lose capacity during the trial follow up period, an appropriate legal representative will be consulted and will provide consent to ongoing trial participation after appropriate discussion with the trials team and having read the PIS. If the legal representative does not agree to ongoing trial participation, the subject will be withdrawn from trial follow up.

*Figure 1 Study Flow Chart and Anticipated Recruitment*



## Study Intervention

FMT is prepared in a laboratory at St Thomas' Hospital in accordance with the principles of Good Manufacturing Practice (GMP) and under Manufacturing Authorisation for an Investigational Medicinal Product (MIA(IMP)) from the Medicines and Healthcare products Regulatory Agency (MHRA). FMT donors are healthy volunteers with no medical problems and normal body mass index. They must not be taking any regular medications and are rigorously screened for blood borne and enteric pathogens prior to donation. Donors undergo questionnaire screening for risk factors at baseline and again at donation to reduce the risk of transmissible infection as outlined in table 2 (full questionnaire in supplementary materials). Stool is processed (diluted and filtered with the addition of glycerol) within 6 hours of donation and stored at -80 degrees Celsius for up to six months (as previously described) (18). Material for FMT has full traceability from donor to recipient and aliquots of donor stool are kept for 30 years to allow further testing in the case of any adverse events. Placebo is a solution of saline with glycerol without faecal matter.

Table 2 blood and stool testing of donor FMT samples

### Blood (serology)

- HIV 1+2 serology
- HTLV I/II Ab
- Hepatitis A IgG (and if positive IgM)
- Hepatitis B surface antigen (HBsAg) and core antibody
- Hepatitis C (HCV Ab)
- Hepatitis E
- Syphilis
- CMV/EBV IgG/M
- Strongyloides stercoralis (ELISA)

### Stool

- PCR for gastroenteritis agents (*Campylobacter*, *Salmonella*, *Shigella* and *E. coli* O:157)
- Ova, cysts and parasites by concentration and microscopy x3
- *C. difficile* test
- Norovirus PCR
- Screen for gentamicin and carbapenem resistant Gram negative organisms
- Screen for MRSA
- Helicobacter pylori antigen
- Entamoeba histolytica PCR

1  
2  
3  
4  
5  
6  
7  
8  
9  
10  
11  
12  
13  
14  
15  
16  
17  
18  
19  
20  
21  
22  
23  
24  
25  
26  
27  
28  
29  
30  
31  
32  
33  
34  
35  
36  
37  
38  
39  
40  
41  
42  
43  
44  
45  
46  
47  
48  
49  
50  
51  
52  
53  
54  
55  
56  
57  
58  
59  
60

Following identification, all patients will attend a screening visit and sign the informed consent form. If deemed to be eligible they will attend for a baseline visit with full clinical history and examination. Medication history will be recorded. Patients will complete a dietary questionnaire. Baseline samples of blood, urine, saliva and stool will be obtained. All patients will subsequently attend for a gastroscopy at which the FMT or placebo will be administered under direct visualization into the jejunum via a nasojejunal tube. This will be performed as per the local Endoscopy Unit Protocol using topical local anaesthetic spray or midazolam sedation as per patient preference. Patients will first be asked to take bowel preparation to purge the bowel of its native bacteria. This consists of two sachets of Moviprep<sup>®</sup> taken prior to gastroscopy. Patients will be monitored for side effects in the Clinical Research Facility after the procedure.

### Evaluations during and after treatment

Participants will be reassessed at 7 (+/- 5), 30 (+/-7) and 90 (+/-7) days post intervention. They will be reviewed in the Clinical Research Facility and undergo physical examination, review of medications and dietary changes and adverse event monitoring. Samples of blood, urine, saliva and stool will be taken at these visits also. At the end of the 90 day follow up period, patients will return to their usual care pathway.

### Statistical analysis

#### Sample Size

This feasibility study will evaluate feasibility parameters using 95% Confidence Intervals. The sample size has been proposed mainly to enable the trial to be conducted within the allocated budget and with acceptable precision for continuous outcomes. According to the simulation work by Teare MD et al. (18), even with the relatively small pilot sample size of 20, the planned studies would have at least 80% power to detect the target effect size (for continuous outcomes) more than 75% of the time. Teare et al. recommend that 60 to 100 subjects are sufficient to estimate an event rate (such as recruitment rates) with acceptable precision in a feasibility study, while sample sizes between 24 and 50 have been recommended for the accurate estimation of standard deviations. Therefore, we have chosen a sample size of 32 patients in this trial to have reliable data on all critical parameters (including event rates) which can also be utilised when planning a larger intervention trial. For event rates (e.g. recruitment rates) and particularly in the extreme case with lower rates e.g. 10%, we estimate a drop of precision by only 5% using our updated sample size and the minimum recommended by Teare et al. (0.16 for 60 patients vs 0.21 for 32 patients). Figure 2 below illustrates the

reduction in precision of different rates when the sample size increases for binary outcomes. This sample size will also be feasible within the budget and will provide acceptable information for planning a future large clinical trial.

*Figure 2 Confidence interval width around one proportion (P) by sample size (N) from PASS software REF - PASS 15 Power Analysis and Sample Size Software (2017). NCSS, LLC. Kaysville, Utah, USA, [ncss.com/software/pass](http://ncss.com/software/pass).*

The sample size of 32 patients will undergo randomisation in a 3:1 ratio. This will allow the study to demonstrate feasibility of randomising, yet providing robust evidence with respect to the feasibility of the treatment, and preliminary evidence of efficacy parameters.

The following feasibility criteria have been established:

- 25% of screened patients will consent: 256 patients will allow the estimate of the 2-Sided 95% confidence interval of the proportion of consented patients, where the distance from the observed proportion to the limit is 0.058 units.
- 50% of patients screened will fulfil inclusion/exclusion criteria for the trial: screening 64 patients will allow the estimate of the 2-Sided 95% confidence interval of the proportion of patients eligible, where the distance from the observed proportion to the limit is 0.128 units.
- 80% of randomised patients will complete treatment and follow up: 26 of 32 patients completing will allow the estimate of the 2-Sided 95% confidence interval for a single proportion, where the distance from the observed proportion to the limit is 0.177 units.

Differences between the placebo and treatment group in efficacy binary outcomes, will be estimated along with the two-sided 95% CI. Assuming the proportion with the outcome in the control group is 0.5 our sample size will allow estimation of the half-width of the confidence intervals for different size of differences as indicated below. Differences of 0.4 or higher will be distinguishable from 0.

*Table 3 Half width of confidence intervals for differences in proportions between two groups with given sample size, placebo group  $p=0.5$  (created with PASS software REF - PASS 15 Power Analysis and Sample Size Software (2017). NCSS, LLC. Kaysville, Utah, USA, [ncss.com/software/pass](http://ncss.com/software/pass).)*

| Difference | 0.1   | 0.2   | 0.3   | 0.4   | 0.5   |
|------------|-------|-------|-------|-------|-------|
| Width      | 0.398 | 0.392 | 0.382 | 0.337 | 0.347 |

The half-width of the 95% CI of the difference in means for continuous outcome will be 0.889 SD.

## Clinical Endpoints

Clinical and safety events will be listed and summarised by intervention group. MELD (15) scores will be calculated by visit and treatment group.

## Data synthesis, analysis and presentation

Feasibility and efficacy outcomes will be summarised using the appropriate descriptive statistics, and 95% Confidence Intervals will be calculated to allow for success and go/no go decisions. Biomarker data will be pre-processed according to the established standards for each platform, and statistical analyses will be performed using non-parametric and permutation based methods which are more appropriate for small sample sizes.

## Statistical Software

Analyses will be performed using R and/or Stata statistical software packages.

## Discussion

The PROFIT study is the first study to look at the use of FMT delivered directly into the small bowel in patients with cirrhosis. Liver transplantation is a highly selective treatment and only those most likely to benefit will be listed. Depending on blood type patients can wait up to 24 months for a liver transplant. There are even fewer options for patients who are unsuitable for transplantation.

Cirrhosis is often complicated by recurrent admissions with sepsis, variceal bleeding, ascites and hepatic encephalopathy. We know that patients with cirrhosis have enteric dysbiosis and altered gut permeability. The non-absorbable antibiotic rifaximin has proved useful in patients with cirrhosis and chronic hepatic encephalopathy, but the long-term benefits of antibiotic use are unknown and the possibility of development of bacterial resistance remains with all antibiotics. The possibility of re-populating the gut of cirrhotic patients with healthy gut microbiota could be a potential alternative, providing a new treatment approach for these vulnerable individuals.

A group in the USA have recently published the results of the impact of FMT delivered via enema in 10 cirrhotic patients, compared with 10 patients receiving standard of care treatment (19). FMT was found to be safe and the patients in the treatment group did not have any admissions for HE, whereas there were six episodes of HE in the standard of care group. Four of these episodes required hospital admission. The FMT group were treated with broad spectrum antibiotics prior to FMT administration, whereas the standard of care group were not, meaning that the effects of FMT cannot be clearly separated from the antibiotic administration. We hope that PROFIT will add to the knowledge base of the use of FMT in cirrhosis and will provide an accurate assessment of the safety of FMT. We plan to treat the FMT and control groups identically, aside from the administration of FMT to accurately assess its impact, without the confounding factor of antibiotic treatment.

A limitation of our study is the single-blinded design. This was selected due to the inherent difficulties in preparing a matched placebo, without introducing substances that may upset

1  
2  
3 the delicate gut microbiota. The IMP will be delivered by the trial investigators, so it has not  
4 been possible to blind the clinicians in this study. Patients and the trial statistician will be  
5 blinded.  
6  
7

8 The study is not powered to detect differences in clinical outcomes, but may provide evidence  
9 for markers relating to clinical outcomes that could be studied in a larger RCT.  
10

## 11 **Sponsor**

12  
13  
14 The PROFIT trial is co-sponsored by King's College Hospital and Kings' College London. The  
15 funding was supplied by an NIHR research grant for patient benefit (PB-PG-0215-36070).  
16

## 17 **Trial Monitoring Groups**

### 18 **Trial Steering Committee (TSC)**

19  
20  
21 This group will oversee the running of the trial and discuss any issues that may arise  
22 throughout the process of recruitment and follow up of patients. The group will be chaired  
23 by an independent clinician. Investigators will report to the group on a regular basis. The Data  
24 Monitoring Committee (DMC) will inform the TSC if there are any issues raised from its  
25 discussions.  
26  
27  
28  
29

### 30 **Data Monitoring Committee**

31  
32  
33 This is an entirely independent group that analyzes interim data, to determine whether or not  
34 the trial is safe to continue. It monitors adverse events and adverse reactions and reacts to  
35 any issues and directs the TSC as to whether or not the trial should continue. The DMC  
36 undertakes interim statistical analysis using an independent statistician to ensure the ongoing  
37 safety and integrity of the trial. The members of this committee are independent of the trial,  
38 but will be experienced clinicians with expertise in clinical trials.  
39  
40  
41

### 42 **Ethics and Dissemination**

43  
44  
45 The ethical permission has been given by the South-East Research Ethics Committee, REC  
46 reference 17/LO/2081, IRAS project ID 197237. EUDRACT number 2017-003629-13.  
47 The results of the trial will be analyzed and published in a peer reviewed journal and  
48 disseminated at international conferences.  
49  
50

### 51 **Funding statement**

52  
53  
54 This work was supported by the NIHR, grant number PB-PG-0215-36070. This paper presents  
55 independent research funded by the National Institute for Health Research (NIHR) under its  
56 Research for Patient Benefit (RfPB) Programme (Grant Reference Number PB-PG-0215-  
57 36070). The views expressed are those of the author(s) and not necessarily those of the NHS,  
58 the NIHR or the Department of Health & Social Care.  
59  
60

## Competing Interests Statement

Dr Shawcross has received fees from Norgine, Falk and Shinogi-, outside the submitted work. Dr Goldenberg reports grants and personal fees from Astellas, personal fees from MSD, personal fees from Pfizer, personal fees from Shinogi, outside the submitted work.

## Acknowledgements

We would like to thank the clinicians involved, King's College Hospital R&D Department, the NIHR, patient advisers and lay reviewers for their contributions in the set-up of the PROFIT trial. We would also like to acknowledge Liz Allen, our QP, for her contribution to the MHRA approval process.

## Author Contributions

CW and DS wrote the manuscript, with assistance from SG, VP and ASF. AD and CF prepared the statistical analysis plan. LC and AO'B advised on study analyses and the format of the protocol for submission. SG provided the expert advice on FMT and has set up the FMT service at GSTT, which will supply the FMT to the study. All authors reviewed and edited the manuscript prior to submission.

1. Wiest R, Garcia-Tsao G. Bacterial translocation (BT) in cirrhosis. *Hepatology*. 2005;41(3):422-33.
2. Jalan R, Fernandez J, Wiest R, Schnabl B, Moreau R, Angeli P, et al. Bacterial infections in cirrhosis: a position statement based on the EASL Special Conference 2013. *J Hepatol*. 2014;60(6):1310-24.
3. Bajaj JS, Heuman D. M., Hylemin P.B. Sanyal A. J., White M. B. <Altered profile of human gut microbiome is associated with cirrhosis and its complications>. *Journal of Hepatology*. 2014;60:940-7
4. Nolan JP. The role of intestinal endotoxin in liver injury: a long and evolving history. *Hepatology*. 2010;52(5):1829-35.
5. Qin N, Yang F, Li A, Prifti E, Chen Y, Shao L, et al. Alterations of the human gut microbiome in liver cirrhosis. *Nature*. 2014;513(7516):59-64.
6. Bajaj JS, Heuman DM, Sanyal AJ, Hylemon PB, Sterling RK, Stravitz RT, et al. Modulation of the metabiome by rifaximin in patients with cirrhosis and minimal hepatic encephalopathy. *PLoS One*. 2013;8(4):e60042.
7. Shawcross DL. Is it time to target gut dysbiosis and immune dysfunction in the therapy of hepatic encephalopathy? *Expert Rev Gastroenterol Hepatol*. 2015;9(5):539-42.
8. Patel V OJ, Sturgeon J, Habtemariam Z, Preedy H, Richardson P, et al. Rifaximin Is Efficacious In The Treatment Of Chronic Overt Hepatic Encephalopathy: A UK Liver Multi-Centre Experience [Abstract]Suppl 1 *Gut* 2014;63.
9. NICE. National Institute for Health and Care Excellence. Rifaximin for the maintenance treatment of hepatic encephalopathy. 2015 Mar. Report No.: ID496.
10. NICE. National Institute for Health and Care Excellence. Faecal microbiota transplant for recurrent *Clostridium difficile* infection. 2014 Mar. Report No.: Interventional Procedure Guidance 485.
11. Sudarshan Paramsothy MAK, Nadeem O Kaakoush, Alissa J Walsh, Johan van den Bogaerde, Douglas Samuel, Rupert W L Leong, Susan Connor, Watson Ng, Ramesh Paramsothy, Wei Xuan, Enmoore Lin, Hazel M Mitchell, Thomas J Borody. <Multidonor intensive faecal microbiota transplantation for active UC; a randomised placebo controlled trial.pdf>. *Lancet*. 2017;389:1218-28.
12. Paramsothy S, Paramsothy R, Rubin DT, Kamm MA, Kaakoush NO, Mitchell HM, et al. Faecal Microbiota Transplantation for Inflammatory Bowel Disease: A Systematic Review and Meta-analysis. *J Crohns Colitis*. 2017;11(10):1180-99.
13. Rossen NG, Fuentes S, van der Spek MJ, Tijssen JG, Hartman JH, Duflou A, et al. Findings From a Randomized Controlled Trial of Fecal Transplantation for Patients With Ulcerative Colitis. *Gastroenterology*. 2015;149(1):110-8 e4.
14. Moayyedi P, Surette MG, Kim PT, Libertucci J, Wolfe M, Onischi C, et al. Fecal Microbiota Transplantation Induces Remission in Patients With Active Ulcerative Colitis in a Randomized Controlled Trial. *Gastroenterology*. 2015;149(1):102-9 e6.
15. Kamath PS, Wiesner RH, Malinchoc M, Kremers W, Therneau TM, Kosberg CL, et al. A model to predict survival in patients with end-stage liver disease. *Hepatology*. 2001;33(2):464-70.

- 1  
2  
3  
4  
5  
6  
7  
8  
9  
10  
11  
12  
13  
14  
15  
16  
17  
18  
19  
20  
21  
22  
23  
24  
25  
26  
27  
28  
29  
30  
31  
32  
33  
34  
35  
36  
37  
38  
39  
40  
41  
42  
43  
44  
45  
46  
47  
48  
49  
50  
51  
52  
53  
54  
55  
56  
57  
58  
59  
60
16. Mazzaferro V RE, Doci R, Andreola S, Pulvirenti A, Bozzetti F, Montalto F, Ammatuna M, Morabito A, Gennari L Liver transplantation for the treatment of small hepatocellular carcinomas in patients with cirrhosis. *New England Journal of Medicine*. 1996;334(11):693-700.
17. DL S. RANDOMISED CLINICAL FEASIBILITY TRIAL PROTOCOL PROFIT: A PROspective, randomised placebo controlled feasibility trial of Faecal microbiota Transplantation in cirrhosis . 2015.
18. Goldenberg SD BR, Beales I, Digby-Bell J, Irving P, Kellingray L, Narbad A, Franslem-Elumogo N. Comparison of different strategies for providing fecal microbiota transplantation to treat patients with recurrent *Clostridium difficile* infection in two English hospitals: a review. *Infectious Diseases and Therapy* 2018.
19. Bajaj JS, Kassam Z, Fagan A, Gavis EA, Liu E, Cox IJ, et al. Fecal Microbiota Transplant from a Rational Stool Donor Improves Hepatic Encephalopathy: A Randomized Clinical Trial. *Hepatology*. 2017.





Figure 1 Study Flow Chart and Anticipated Recruitment

190x212mm (300 x 300 DPI)

1  
2  
3  
4  
5  
6  
7  
8  
9  
10  
11  
12  
13  
14  
15  
16  
17  
18  
19  
20  
21  
22  
23  
24  
25  
26  
27  
28  
29  
30  
31  
32  
33  
34  
35  
36  
37  
38  
39  
40  
41  
42  
43  
44  
45  
46  
47  
48  
49  
50  
51  
52  
53  
54  
55  
56  
57  
58  
59  
60

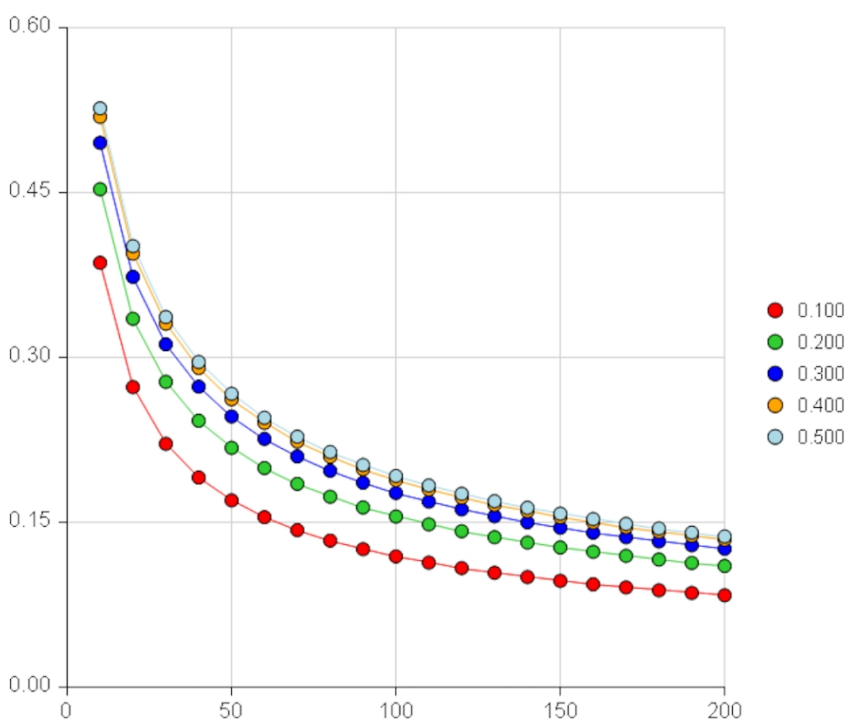

Figure 2 Confidence interval width around one proportion (P) by sample size (N) from PASS software

101x90mm (300 x 300 DPI)

---

## Participant Information Sheet

---

*Short Title:*           **PROFIT**

*Full Title of Study:*   **A Prospective, randomized placebo controlled feasibility trial of faecal microbiota transplantation in cirrhosis**

*Chief Investigator:*   **Dr D. Shawcross**

*Researchers:*           **Dr C Woodhouse, Dr V. C. Patel, Prof A. Sanchez-Fueyo,**

### Introduction

You are invited to take part in this research study. Before you decide it is important for you to understand why the research is being done and what it will involve. Please take time to read the following carefully and discuss it with friends, family or your GP if you wish. Ask us if there is anything that is not clear or if you would like more information. Take time to decide whether or not you wish to take part.

### What is the purpose of the study?

Our bodies contain trillions of bacteria that live in our bowels. These bacteria help to keep us healthy. Patients with liver cirrhosis have more 'unfriendly' bacteria than people without cirrhosis. Patients with cirrhosis also have a 'leaky' gut, allowing these bacteria to leak into the blood stream, potentially causing serious infections. These can usually be treated with antibiotics, but may be very severe and may also cause kidney failure, hepatic encephalopathy (a condition where toxins build up in the blood stream, causing confusion and even coma) and potentially life threatening bleeding.

The treatment proposed in our study, FMT (faecal microbiota transplantation,) takes the bacteria from the intestines of healthy volunteers and replaces the abnormal bacteria in the gut of a patient with cirrhosis. The aim of faecal microbiota transplantation (FMT) is to replace the 'unfriendly' bacteria with 'friendly' bacteria from healthy volunteers, therefore preventing them from getting into the blood stream and causing serious problems.

Volunteers are screened very thoroughly (in a similar way to blood donors) to ensure that they are healthy and not liable to pass on any infections to the recipients of the FMT.

FMT has been tested in a small group of patients with cirrhosis in America and was found to be safe, and has also been used more widely in other conditions such as patients with a gut infection called 'clostridium difficile' and patients with inflammatory bowel disease. It is extremely successful in these patients and we would like to see if it can be as successful in liver patients.

Results from this study would support further research into the benefit of using FMT to lessen infection rates in patients with liver cirrhosis who have developed bowel problems.

### What groups of patients will the study involve?

We are interested in involving people in this study who have liver cirrhosis of any cause.

**Why have I been invited?**

All patients who are admitted to the Liver wards and/or seen in the Liver out-patient clinics at King's College Hospital NHS Foundation Trust who have liver cirrhosis may be eligible to participate in this study. This also includes patients that are awaiting consideration for or have already been listed for liver transplantation

**Do I have to take part?**

No, participation is entirely voluntary. It is up to you whether or not you wish to take part. If you decide to take part you will be given this information sheet to keep and asked to sign a consent form. If you decide to take part you are still free to withdraw at any time and without giving a reason. This will not affect the medical care you will receive.

**Who is organising and funding this study?**

The doctor in charge of this study is Dr Debbie Shawcross. The study is funded by the National Institute of Health Research and is being sponsored by King's College London and Kings College Hospital NHS Foundation Trust.

**Who has reviewed the study?**

All research in the NHS is looked at by an independent group of people, called a Research Ethics Committee, to protect your interests. This study has been reviewed and approved by the London South East Research Ethics Committee. It has also been approved by the Health Research authority and the Medicines and Healthcare products Regulatory Agency.

**What will happen to me if I take part (SUMMARY)?**

If you decide to take part you will be randomly assigned to one of two groups. One group (the 'active treatment' group) will receive Faecal Microbiota Transplantation (FMT) whilst the other group (the comparison or 'control group') will receive a 'placebo' treatment. Administration of placebo or FMT will take place only ONCE during this study.

The placebo treatment is a 'dummy' treatment given to participants in the control group of a clinical trial. This method using a 'placebo control' is used to make sure the study results are reliable by checking that any changes measured are actually due to the effect of the active drug and not just because of chance. The placebo in this trial is a solution of saline and glycerol (salty water and a preservative, which are the same ingredients used in the FMT itself, just without the FMT.)

Both groups will then be followed up to see how effective the active treatment is based on various measurements taken. Blood, urine, saliva and stool samples will be obtained for tests at four specific times. Firstly when starting the study at 'baseline' (just before the FMT or placebo is given,) and then repeated at 7, 30 and 90 day intervals after treatment has been administered. Follow-up appointments at the 7, 30 day and 90 days after starting will be arranged to coincide as far as possible with planned routine medical appointments.

| Study procedures                  | Screening | Baseline (-7 days) | Endoscopy | Day 7 (+/- 5days) | Day 30 (+/- 7 days) | Day 90 (+/- 7 days) |
|-----------------------------------|-----------|--------------------|-----------|-------------------|---------------------|---------------------|
| Signed informed consent           | X         |                    |           |                   |                     |                     |
| Eligibility Criteria              | X         |                    |           |                   |                     |                     |
| Participant demographics          | X         |                    |           |                   |                     |                     |
| Medical and surgical histories    | X         |                    |           | X                 | X                   | X                   |
| Dietary questionnaire             |           | X                  |           | X                 | X                   | X                   |
| Medication usage                  |           | X                  |           | X                 | X                   | X                   |
| Clinical examination              |           | X                  |           | X                 | X                   | X                   |
| Blood sampling                    |           | X                  |           | X                 | X                   | X                   |
| Stool sampling                    |           | X                  |           | X                 | X                   | X                   |
| Saliva sampling                   |           | X                  |           | X                 | X                   | X                   |
| Urine sampling                    |           | X                  |           | X                 | X                   | X                   |
| Randomisation                     |           | X                  |           |                   |                     |                     |
| FMT/placebo administration        |           |                    | X         |                   |                     |                     |
| Adverse events monitoring /Safety |           |                    | X         | X                 | X                   | X                   |

As part of the study you will have an endoscopy (a camera test looking into your stomach/small bowel) to give you the FMT or the placebo treatment. This means that you will not have to drink the liquid as it is placed directly into the small bowel where it is needed, avoiding the stomach acid, which could stop it working. Before the endoscopy you will be given a medicine to clear your own gut bacteria called 'Moviprep.' This will give you loose bowel motions, which is a normal reaction to the Moviprep. This is essential to clear your own gut bacteria from the bowel to allow the FMT to work.

We will see you after the endoscopy at days 7, 30 and 90 to take blood, urine, saliva and faecal samples from you. We will also assess your general wellbeing and check that your medicines have not changed. Blood samples will usually be taken at the time of when you are having tests done as part of your routine clinical care, to reduce the number of times you have to have a needle in your arm and, where possible, samples will be taken from tubes already in your blood vessels to minimise discomfort to you.

We will ask you to collect the urine and stool samples in the morning of each study visit and bring this with you when you attend clinic. We will ensure you are given all the necessary collection pots for this. After the last visit at 90 days, you will return to the usual standard of care as you were having for you underlying condition.

**More detailed information about the study visits can be found on page 7 of this information sheet.**

### What are the side effects of taking part?

If you are assigned to the active treatment group and receive FMT, there are some possible side effects that you should be aware of. Faecal transplants have not been widely used in patients with cirrhosis yet, but have been used in lots of patients with an antibiotic associated diarrhoea called 'clostridium difficile.' Small numbers of patients in these studies reported some abdominal distension/bloating, flatulence, diarrhoea or constipation as side effects of the treatment. Part of this study is to assess how well tolerated the treatment is and whether or not patients with cirrhosis experience similar symptoms.

Side effects of blood sampling can include bruising and it can be uncomfortable. However, every effort will be made to perform blood sampling at the same time as regular blood tests to minimise any discomfort. There should be no side effects of sampling your urine and stool as we will simply ask you to collect the samples when you go to the toilet as normal. Saliva will be collected by asking you to rinse your mouth out with water and to spit into a collection pot.

### **What are the possible disadvantages and risks of taking part?**

We hope that the knowledge we would gain from this study will improve our understanding of the way in which FMT works, and the role of the gut and immune system in liver cirrhosis. Patients who received FMT in a small study in America did well and had fewer hospital admissions than those in the 'standard of care' group. FMT appears to be safe in the considerable numbers of patients who have received it for other reasons. There are no disadvantages or risks involved in taking part with regard to the samples being obtained, and the amount of blood taken will not be harmful to you. The placebo treatment is not harmful, but is not expected to have any benefit on your clinical condition as it contains no active drug or therapy. All patients, regardless of whether they receive placebo or FMT have the same rigorous follow up and support from the trials team.

You will be closely monitored after the treatment is given and will be seen at regular intervals afterwards to see if you have experienced any side effects. We do not anticipate any serious problems to occur after the FMT or placebo treatment, but you will be given contact numbers should you run into any problems outside of the trial visits.

Apart from the side effects of FMT, all patients (those on placebo and active treatment) will need to take bowel preparation, which can cause dehydration. The endoscopy itself also has a small risk of bleeding, perforation (this is very rare and is thought to occur in around only 1 in 2000 tests) and damage to teeth and dental work. There is also a risk of aspiration of the FMT or placebo into the lungs, therefore you will be monitored closely after the procedure to monitor for this.

### **What are the possible benefits of taking part?**

You will be taking part in a new and innovative trial to assess the effect of FMT on cirrhosis. There are few treatments available to patients with cirrhosis, aside from liver transplantation. Unfortunately due to the scarcity of donor organs, even those listed for transplant can wait months or even years for a new liver. Others are too unwell or frail to be listed for transplant. We hope that looking at FMT in more detail may provide a much needed treatment for patients with cirrhosis who are not suitable for transplant or to help those awaiting a new liver. This study is designed to look at the safety and tolerability of the treatment to see if a larger study would show an improvement in wellbeing for these patients.

### What if I lose the ability to provide consent after enrolling to the study ('loss of capacity')?

In the event that you lose the ability to provide ongoing consent during the research due to your illness, having been able to provide consent at the start of the study, we will approach an appropriate relative or friend on your behalf to ask them if they think that you would have wanted to continue participation in this study. This person is termed a 'Consultee' and they are asked to set aside their own views and provide advice on you continuing to participate in the research, taking into consideration your wishes and interests.

Any advance decisions you may have made, and that they are aware of, should take precedence. If the Consultee decides that you would have no objection to continue taking part they will be asked to read and sign a consultee declaration form. They will then be given a copy to keep. If they decide that you would not wish to continue taking part we will withdraw you from the study; this will not, in any way, affect the standard of care you receive. If the Consultee we approach does not feel able to take on this role they may want to identify someone else to do it. They will be asked to take time to decide whether or not they feel that you would wish to continue taking part. They will be encouraged to ask the research team if there is anything that is not clear or if they would like more information. The information they will be provided with is the same as that provided to you.

You may wish to identify a suitable Consultee at this stage given the above, so that if you do lose the ability to provide consent after you are enrolled (should you decide to participate in the study) we can approach a person of your choice.

### What if something goes wrong?

If you have a concern about any aspect of this study, you should ask to speak to your study doctor who will do their best to answer your questions (contact details on page 8) If you remain unhappy and wish to complain formally, you can do this through the NHS Complaints procedure by contacting your local Patient Advice Liaison Service (PALS) office. Details of your local office can be obtained by asking your study doctor, GP, telephoning your local hospital or looking on the NHS choices website. <http://www.nhs.uk/pages/home.aspx>

Every care will be taken in the course of this study. However in the unlikely event that you are injured by taking part, compensation may be available.

In the event that something does go wrong and you are harmed during the research and this is due to someone's negligence then you may have grounds for a legal action for compensation against King's College Hospital NHS Foundation Trust & King's College London, but you may have to pay your legal costs.

Regardless of this, if you wish to complain, or have any concerns about any aspect of the way you have been approached or treated by members of staff or about any side effects (adverse events) you may have experienced due to your participation in the study the normal National Health Service

complaints mechanisms are available to you. Please ask your study doctor if you would like more information on this.

### **Will my taking part in this study be kept confidential?**

Yes. Once you have consented to take part in the study, you will be given a unique study number, which will be used to identify any samples and information collected during the research.

Some information regarding you and your condition will be recorded as part of this study. We will not record any personal identifiable information (name, date of birth or contact details) as part of the research records. All information will be stored anonymously in a password-protected database, or in a file in a secure research office. Only your treating doctors and the research team will have access to this information.

We will inform your General Practitioner (GP) of your participation in the study - this is routine for this type of research and helps them to care for you during the trial. We advise that you inform your private medical insurance provider (if you hold private medical insurance) of your participation in this study - this again is routine procedure for this type of research.

### **What will happen to the results of the research study?**

When we have results for an adequate number of patients after the study is completed we plan to publish them in an international journal so that the information can benefit as many people as possible. We can provide you with a brief summary of the results of the study when available should you desire this.

### **What will happen to any samples that I give?**

Every effort will be made to ensure blood samples for the study are taken at the same time as samples are taken as part of your routine clinical care – so that there will be no additional discomfort to you as a result of being involved in this study. The amount of blood taken per time point for the study is approximately 50mls or 10 teaspoonfuls. This is a small amount for the body (which contains about 5L of blood, or 5000mL) and will not adversely affect you in any way.

Samples of blood and other fluids obtained may be used immediately or saved for human or bacterial DNA or immune system analysis in the future, in the Liver Biobank. Some of the actual tests on the samples that are obtained as a result of you taking part in the study will be performed on site at King's College Hospital NHS Foundation Trust, whilst some samples will be transferred to other collaborator laboratories in the UK and France. At all times any samples that are transferred and stored will be coded anonymously regardless of which laboratory they are sent to.

### **Contact details:**

Thank you for taking the time to read this information.

If there is any other information you would like, please do not hesitate to contact us on the numbers below. Out of hours or if a response on the above contact number is unavailable, it is possible to contact the on-call Hepatology Registrar – via KCH Switchboard – who will pass any messages on to the senior medical staff involved.



Principal investigator: Dr Debbie Shawcross  
Clinical research fellow: Dr C Woodhouse  
Research nurse: Ane Zamalloa

Tel: 02032992504  
Tel: 02032992504  
Tel: 0203299 7623

For peer review only

1  
2  
3  
4  
5  
6  
7  
8  
9  
10  
11  
12  
13  
14  
15  
16  
17  
18  
19  
20  
21  
22  
23  
24  
25  
26  
27  
28  
29  
30  
31  
32  
33  
34  
35  
36  
37  
38  
39  
40  
41  
42  
43  
44  
45  
46  
47  
48  
49  
50  
51  
52  
53  
54  
55  
56  
57  
58  
59  
60

### What will happen to me if I take part (DETAILED EXPLANATION)?

You will be assessed for your eligibility to be involved in this study, and if you are happy to proceed will sign the consent form with a member of the research team. You will then be randomly allocated to one of two treatment groups:

- 1) the 'active treatment' group: participants in this group will receive the treatment being tested (FMT), or
- 2) the comparison or 'control group'; participants in this group will receive a 'placebo' treatment, which is a 'dummy' treatment and is indistinguishable from the actual treatment given to participants in the 'active treatment' group.

Before starting treatment with either of the above, you will undergo baseline assessments, which involve the following (those marked with \* are being done as part of the study):

- Medical history including current medication usage.
- Physical examination including blood pressure, pulse rate, height, weight.
- Dietary questionnaire\* and quality of life questionnaire\*
- Blood sampling: will include tests of blood counts, kidney and liver function performed as part of your routine clinical care as well as checks for various viruses that can affect the liver.
- Blood sampling\*: to measure endotoxin levels, immune function including DNA analysis and metabolic profiling.
- Urine sampling\*: we will ask you to provide a urine sample (approx. 20mls) to measure metabolic profiling. If you are a woman of child-bearing age, we will also do a pregnancy test.
- Stool sampling\*: we will ask you to provide stool samples to measure what types of bacteria are found, and in what patterns and quantities.
- Salivary sampling\*: we will ask you to provide saliva samples from your mouth to measure what types of bacteria are found, and in what patterns and quantities.
- If you have fluid in your abdomen called "ascites" we would like to take a sample of the fluid to check for infection. This involves passing a small needle into your abdomen under aseptic conditions. This test is voluntary and you do not have to take part, but it would help us to check for infection in the fluid and would mean we could treat any infection early, should one be present\*.

After the baseline assessments have been completed, you will come up to the endoscopy unit to have the FMT or placebo treatment given. The procedure will be explained to you and the risks and benefits discussed. Endoscopy is a safe test, but like all procedures has some risks. The main risks to be aware of are a small risk of bleeding and the risk of perforation (1 in 9000.) There is also a risk of damaging teeth or dental work and a small risk of 'aspiration' which is where fluid from the stomach goes into the lungs. This is why we ask you not to eat for six hours prior to the test, to make sure the stomach is empty. Some people also develop a sore throat after the procedure. This should get better on its own.

You will also be given a medicine prior to the test called 'Moviprep' to help clear your bowels of their usual bacteria prior to the treatment with FMT or placebo. This is a safe medicine, but will cause you to have loose stools. This is essential to its function, but it is important you drink

1  
2  
3  
4 plenty of fluid to prevent dehydration. Side effects can include dehydration, nausea and  
5 vomiting.  
6

7 You will take one sachet of Moviprep mixed with a litre of water at 19.00 the night before the  
8 test. You can then have a light meal. On the morning of the endoscopy you will drink another  
9 sachet of Moviprep mixed with one litre of water at around 7.00am. You can take your usual  
10 medications as normal. There is a lot of fluid to drink, so you may find it easier if it is chilled or  
11 mixed with a squash (not blackcurrant) to make it easier to drink.  
12  
13

14 You will undergo similar assessments to the baseline visit at 7, 30 and 90 day intervals as you did  
15 just before starting treatment. You will in addition undergo the following as part of the study:  
16

- 17 • Study treatment adverse events monitoring\*: this to check whether you may have  
18 experienced any side effects that may be due to the study medication.  
19  
20  
21

22 Your last visit will be at 90 days from the start of the trial. Samples will be collected and you will  
23 be reviewed by the team to check for any side effects. You will have the opportunity to ask  
24 questions to the team at all visits throughout the duration of the study and if you have any  
25 concerns outside of these visits you will be told who to contact.  
26  
27

28 Thank you for taking the time to read this information. If there is any other information you  
29 would like, please do not hesitate to contact us (020 3299 9000 ext. 32504).  
30  
31

32 Dr C Woodhouse, Dr V. C. Patel, Professor A Sanchez-Fueyo, Dr D. Shawcross  
33 Institute of Liver Studies, Kings College Hospital  
34  
35  
36  
37  
38  
39  
40  
41  
42  
43  
44  
45  
46  
47  
48  
49  
50  
51  
52  
53  
54  
55  
56  
57  
58  
59  
60

**Faecal Microbiota Transplant (FMT) for recurrent or refractory *Clostridium difficile* Infection (CDI)**

**Donor screening questionnaire – Part 1**

**Name:**

**DOB:**

**Hospital number:**

**NHS number:**

**Contact details (preferably mobile):**

**Date of assessment:**

**Name / position of assessor:**

|                                                                        |                                                                                                                                                                                                                                                                                                                                                                                                                                                                                                                                                                                                                                                                                                                                                                                                                                                                                                          |
|------------------------------------------------------------------------|----------------------------------------------------------------------------------------------------------------------------------------------------------------------------------------------------------------------------------------------------------------------------------------------------------------------------------------------------------------------------------------------------------------------------------------------------------------------------------------------------------------------------------------------------------------------------------------------------------------------------------------------------------------------------------------------------------------------------------------------------------------------------------------------------------------------------------------------------------------------------------------------------------|
| Donor type                                                             | <input type="checkbox"/> Named donor<br><input type="checkbox"/> Anonymous donor                                                                                                                                                                                                                                                                                                                                                                                                                                                                                                                                                                                                                                                                                                                                                                                                                         |
| If Named donor, name and hospital number of recipient                  |                                                                                                                                                                                                                                                                                                                                                                                                                                                                                                                                                                                                                                                                                                                                                                                                                                                                                                          |
| If Named donor, relationship to recipient                              |                                                                                                                                                                                                                                                                                                                                                                                                                                                                                                                                                                                                                                                                                                                                                                                                                                                                                                          |
| If Named donor, does the recipient normally live in the same dwelling? | <input type="checkbox"/> Yes <input type="checkbox"/> No                                                                                                                                                                                                                                                                                                                                                                                                                                                                                                                                                                                                                                                                                                                                                                                                                                                 |
| Age                                                                    | Exclude if <18 or >60                                                                                                                                                                                                                                                                                                                                                                                                                                                                                                                                                                                                                                                                                                                                                                                                                                                                                    |
| Gender                                                                 | <input type="checkbox"/> Male <input type="checkbox"/> Female                                                                                                                                                                                                                                                                                                                                                                                                                                                                                                                                                                                                                                                                                                                                                                                                                                            |
| Ethnicity                                                              | <input type="checkbox"/> White - White British<br><input type="checkbox"/> White - White Irish<br><input type="checkbox"/> White - Other<br><input type="checkbox"/> Mixed race – White and Black Caribbean<br><input type="checkbox"/> Mixed race – White and Black African<br><input type="checkbox"/> Mixed race – White and Asian<br><input type="checkbox"/> Mixed race – Other<br><input type="checkbox"/> Asian or Asian British – Indian<br><input type="checkbox"/> Asian or Asian British – Bangladeshi<br><input type="checkbox"/> Asian or Asian British – Pakistani<br><input type="checkbox"/> Asian or Asian British – Other<br><input type="checkbox"/> Black or Black British – Caribbean<br><input type="checkbox"/> Black or Black British – African<br><input type="checkbox"/> Black or Black British – Other<br><input type="checkbox"/> Chinese<br><input type="checkbox"/> Other |
| Height cm                                                              |                                                                                                                                                                                                                                                                                                                                                                                                                                                                                                                                                                                                                                                                                                                                                                                                                                                                                                          |

|                                                                                              |                                                                       |                                                                                                                                                                                                                                                                                                                                                                                                                                                                                      |
|----------------------------------------------------------------------------------------------|-----------------------------------------------------------------------|--------------------------------------------------------------------------------------------------------------------------------------------------------------------------------------------------------------------------------------------------------------------------------------------------------------------------------------------------------------------------------------------------------------------------------------------------------------------------------------|
| 1<br>2<br>3<br>4                                                                             | Weight kg                                                             |                                                                                                                                                                                                                                                                                                                                                                                                                                                                                      |
| 5<br>6<br>7                                                                                  | BMI                                                                   |                                                                                                                                                                                                                                                                                                                                                                                                                                                                                      |
| 8<br>9<br>10                                                                                 | Has your weight changed by more than 5lb / 2kg in the past 6 months?  | Exclude if BMI>25<br><input type="checkbox"/> Yes <input type="checkbox"/> No                                                                                                                                                                                                                                                                                                                                                                                                        |
| 11<br>12<br>13<br>14<br>15<br>16<br>17<br>18<br>19<br>20<br>21<br>22<br>23<br>24<br>25<br>26 | Describe your diet (as many as apply):                                | Detail:<br><input type="checkbox"/> Omnivore<br><input type="checkbox"/> Vegetarian<br><input type="checkbox"/> Vegan<br><input type="checkbox"/> Kosher<br><input type="checkbox"/> Halal<br><input type="checkbox"/> Raw food only<br><input type="checkbox"/> Pescatarian<br><input type="checkbox"/> No red meat<br><input type="checkbox"/> Low carbohydrate<br><input type="checkbox"/> Lactose free<br><input type="checkbox"/> Gluten free<br><input type="checkbox"/> Other |
| 27<br>28<br>29<br>30<br>31                                                                   | How many portions of fruit and vegetables do you consume per day?     | <input type="checkbox"/> one or less<br><input type="checkbox"/> two to three<br><input type="checkbox"/> three to four<br><input type="checkbox"/> five to six<br><input type="checkbox"/> seven or more                                                                                                                                                                                                                                                                            |
| 32<br>33<br>34<br>35<br>36                                                                   | How many servings of cow, sheep or goats milk do you consume per day? | <input type="checkbox"/> one or less<br><input type="checkbox"/> two to three<br><input type="checkbox"/> three to four<br><input type="checkbox"/> five to six<br><input type="checkbox"/> seven or more                                                                                                                                                                                                                                                                            |
| 37<br>38                                                                                     | Alcohol – units/week                                                  |                                                                                                                                                                                                                                                                                                                                                                                                                                                                                      |
| 39<br>40                                                                                     | Smoking/day                                                           |                                                                                                                                                                                                                                                                                                                                                                                                                                                                                      |
| 41<br>42<br>43<br>44<br>45<br>46<br>47<br>48<br>49<br>50                                     | Normal bowel habit – average Bristol Stool Consistency                | <input type="checkbox"/> 1<br><input type="checkbox"/> 2<br><input type="checkbox"/> 3<br><input type="checkbox"/> 4<br><input type="checkbox"/> 5<br><input type="checkbox"/> 6<br><input type="checkbox"/> 7<br><br>Exclude if 6 or 7                                                                                                                                                                                                                                              |
| 51<br>52<br>53<br>54<br>55<br>56<br>57<br>58<br>59<br>60                                     | Normal bowel habit – average frequency                                | <input type="checkbox"/> >2/day<br><input type="checkbox"/> once to twice daily<br><input type="checkbox"/> once / 2 days<br><input type="checkbox"/> <once / 2 days<br><br>Exclude if active diarrhoea (>3 UBM/day for at least 2 consecutive days)                                                                                                                                                                                                                                 |

|                                              |                                                                                                                                                                                            |                                                                                                                                  |
|----------------------------------------------|--------------------------------------------------------------------------------------------------------------------------------------------------------------------------------------------|----------------------------------------------------------------------------------------------------------------------------------|
| 1<br>2<br>3<br>4<br>5<br>6<br>7              | During the past 7 days how many days were you physically active for a cumulative total of >60 mins/day?                                                                                    |                                                                                                                                  |
| 8<br>9<br>10<br>11                           | Have you ever been rejected as a blood donor/told not to donate?<br>If yes, why?                                                                                                           | <input type="checkbox"/> Yes <input type="checkbox"/> No<br><br>Exclude if YES                                                   |
| 12<br>13                                     | What is your country of birth?                                                                                                                                                             |                                                                                                                                  |
| 14<br>15<br>16                               | Have you ever resided in another country (other than UK) for >5 years?<br>If so which countries and when?                                                                                  | <input type="checkbox"/> Yes <input type="checkbox"/> No                                                                         |
| 17<br>18<br>19<br>20<br>21<br>22<br>23<br>24 | Do you currently have a profession that is associated with an increased risk of blood-borne transmissible diseases (e.g. daily contact with patients/inmates)?<br>If yes, what profession? | <input type="checkbox"/> Yes <input type="checkbox"/> No<br><br>Exclude if health/social care worker with direct patient contact |
| 25<br>26<br>27<br>28                         | Have you ever had a needle-stick or injury from a blood contaminated object from someone else? If yes, when and how was this follow up?                                                    | <input type="checkbox"/> Yes <input type="checkbox"/> No                                                                         |
| 29<br>30<br>31<br>32<br>33<br>34             | Have you ever injected yourself or been injected with illegal or non-prescribed drugs including body building drugs or cosmetics (even if this was only once or a long time ago?)          | <input type="checkbox"/> Yes <input type="checkbox"/> No<br><br>Exclude if YES                                                   |
| 35<br>36<br>37<br>38                         | Have you ever had a tattoo?<br>If yes, when and in which country was it performed?                                                                                                         | <input type="checkbox"/> Yes <input type="checkbox"/> No<br><br>Exclude if within past 4 months                                  |
| 39<br>40<br>41<br>42                         | Have you ever had a piercing?<br>If yes, when and in which country was it performed?                                                                                                       | <input type="checkbox"/> Yes <input type="checkbox"/> No<br><br>Exclude if within past 4 months                                  |
| 43<br>44<br>45<br>46<br>47                   | Have you ever had acupuncture?<br>If yes, when and in which country was it performed?                                                                                                      | <input type="checkbox"/> Yes <input type="checkbox"/> No<br><br>Exclude if within past 4 months                                  |
| 48<br>49<br>50<br>51<br>52                   | Have you ever had an operation or undergone clinical treatment in a hospital with poor hygienic conditions?<br>If yes, when and in which country was it performed?                         | <input type="checkbox"/> Yes <input type="checkbox"/> No                                                                         |
| 53<br>54<br>55<br>56<br>57                   | Have you ever had a rare infectious disease (e.g. tuberculosis, trypanosomiasis)?<br>If yes, when and which disease?                                                                       | <input type="checkbox"/> Yes <input type="checkbox"/> No                                                                         |
| 58<br>59<br>60                               | Have you ever been vaccinated against Hepatitis A or B?<br>If yes, which?                                                                                                                  | <input type="checkbox"/> Yes <input type="checkbox"/> No                                                                         |



|                                                                                                          |                                                                                                                                                                                                                                                                                                                                                                                                                                                                                                                                                              |                                                                                         |
|----------------------------------------------------------------------------------------------------------|--------------------------------------------------------------------------------------------------------------------------------------------------------------------------------------------------------------------------------------------------------------------------------------------------------------------------------------------------------------------------------------------------------------------------------------------------------------------------------------------------------------------------------------------------------------|-----------------------------------------------------------------------------------------|
| 1<br>2<br>3<br>4<br>5<br>6<br>7<br>8<br>9                                                                | Have you used any antibiotics in the last 3 months?                                                                                                                                                                                                                                                                                                                                                                                                                                                                                                          | <input type="checkbox"/> Yes <input type="checkbox"/> No<br>Exclude if Yes              |
| 10<br>11<br>12                                                                                           | Have you had a fever in the last 2 weeks?                                                                                                                                                                                                                                                                                                                                                                                                                                                                                                                    | <input type="checkbox"/> Yes <input type="checkbox"/> No<br>Exclude if Yes              |
| 13<br>14<br>15<br>16                                                                                     | Have you ever been incarcerated in prison?                                                                                                                                                                                                                                                                                                                                                                                                                                                                                                                   | <input type="checkbox"/> Yes <input type="checkbox"/> No<br>Exclude if in past 4 months |
| 17<br>18<br>19<br>20                                                                                     | Have you ever been immunosuppressed (e.g. during treatment for cancer, or for a solid organ transplant)?<br>If yes, when and why?                                                                                                                                                                                                                                                                                                                                                                                                                            | <input type="checkbox"/> Yes <input type="checkbox"/> No                                |
| 21<br>22<br>23                                                                                           | Have you ever had major gastrointestinal surgery?<br>If yes, when and why?                                                                                                                                                                                                                                                                                                                                                                                                                                                                                   | <input type="checkbox"/> Yes <input type="checkbox"/> No<br>Relative exclusion criteria |
| 24<br>25<br>26<br>27                                                                                     | Have you ever suffered from metabolic syndrome?                                                                                                                                                                                                                                                                                                                                                                                                                                                                                                              | <input type="checkbox"/> Yes <input type="checkbox"/> No<br>Relative exclusion criteria |
| 28<br>29<br>30<br>31                                                                                     | Have you ever suffered from any autoimmune condition (e.g. rheumatoid), asthma or eczema?<br>If yes, which, and do you take any treatment?                                                                                                                                                                                                                                                                                                                                                                                                                   | <input type="checkbox"/> Yes <input type="checkbox"/> No<br>Relative exclusion criteria |
| 32<br>33<br>34<br>35<br>36<br>37<br>38<br>39<br>40<br>41<br>42<br>43<br>44<br>45<br>46<br>47<br>48<br>49 | Have you ever had any chronic pain or fatigue syndromes?<br>If yes, which?                                                                                                                                                                                                                                                                                                                                                                                                                                                                                   | <input type="checkbox"/> Yes <input type="checkbox"/> No<br>Relative exclusion criteria |
| 50<br>51<br>52<br>53<br>54<br>55<br>56<br>57<br>58<br>59<br>60                                           | Have you any history of CJD or other prion disease in your family? If yes, please specify<br>Patients should be considered to be at risk from genetic forms of CJD if they have or have had<br><ol style="list-style-type: none"> <li>1. Genetic testing, which has indicated they are at significant risk of developing CJD or other prion disease</li> <li>2. A blood relative known to have a genetic mutation indicative of genetic CJD or other prion disease</li> <li>3. Two or more blood relatives affected by CJD or other prion disease</li> </ol> | <input type="checkbox"/> Yes <input type="checkbox"/> No                                |
|                                                                                                          | Have you ever received growth hormone or gonadotrophic treatment? If yes, please specify;<br>i) Whether the hormone was derived from human pituitary glands<br>ii) The year of the treatment<br>iii) Whether the treatment was received in the UK or in another country                                                                                                                                                                                                                                                                                      | <input type="checkbox"/> Yes <input type="checkbox"/> No                                |



|                                                                                                                                                                                                                                                                                                                                                                                                                                                                                    |                                                          |
|------------------------------------------------------------------------------------------------------------------------------------------------------------------------------------------------------------------------------------------------------------------------------------------------------------------------------------------------------------------------------------------------------------------------------------------------------------------------------------|----------------------------------------------------------|
| <p>Recipients of hormone derived from human pituitary glands eg growth hormone or gonadotrophin have been identified as potentially at risk of CJD. In the UK, the use of human growth hormone was stopped in 1985 but human-derived products may have been continued to be used in other countries. In the UK, the use of human-derived gonadotrophin was discontinued in 1973 but may have been continued in other countries after this time.</p>                                |                                                          |
| <p>Have you ever had surgery on your brain or spinal cord?<br/>People who underwent intradural neurosurgical or spinal procedures before August 1992 may have received a graft of human-derived dura mater and should be treated as at increased risk, unless evidence can be provided that human-derived dura mater was not used. Patients who received a graft of human-derived dura mater between 1980 and August 1992 are at increased risk of both sporadic CJD and vCJD.</p> | <input type="checkbox"/> Yes <input type="checkbox"/> No |
| <p>Are you normally resident in the UK?<br/>If No state country of usual residence</p>                                                                                                                                                                                                                                                                                                                                                                                             | <input type="checkbox"/> Yes <input type="checkbox"/> No |
| <p>Which countries have you visited in the last 12 months and what was the duration of stay?</p>                                                                                                                                                                                                                                                                                                                                                                                   |                                                          |
| <p>In the past 12 months have you been admitted to a hospital in a country other than the UK?<br/><br/>If yes state when and which countries</p>                                                                                                                                                                                                                                                                                                                                   | <input type="checkbox"/> Yes <input type="checkbox"/> No |
| <p>In the past 12 months have you been admitted to another hospital in London or Manchester?<br/><br/>If yes state when and which hospitals</p>                                                                                                                                                                                                                                                                                                                                    | <input type="checkbox"/> Yes <input type="checkbox"/> No |
| <p>List all current medications:</p>                                                                                                                                                                                                                                                                                                                                                                                                                                               |                                                          |

|  |                                                      |
|--|------------------------------------------------------|
|  | Exclude if any regular prescribed drugs (except OCP) |
|--|------------------------------------------------------|

|                                                                                   |                                                          |
|-----------------------------------------------------------------------------------|----------------------------------------------------------|
| Is patient eligible to donate?                                                    | <input type="checkbox"/> Yes <input type="checkbox"/> No |
| If No document reasons:                                                           |                                                          |
| If Yes proceed to screening tests<br>Ensure consent for testing documented        |                                                          |
| Sign and date (health care practitioner) to indicate patient has provided consent |                                                          |

| Obtain serology for:                       | Requested?                   |
|--------------------------------------------|------------------------------|
| HIV antigen/antibody                       | <input type="checkbox"/> Yes |
| HTLV-1/HTLV-II antibodies                  | <input type="checkbox"/> Yes |
| Hepatitis A IgG (add on IgM if positive)   | <input type="checkbox"/> Yes |
| Hepatitis B surface antigen                | <input type="checkbox"/> Yes |
| Hepatitis C IgG                            | <input type="checkbox"/> Yes |
| Syphilis serology (T. pallidum antibodies) | <input type="checkbox"/> Yes |
| CMV IgG (add on IgM if positive)           | <input type="checkbox"/> Yes |
| EBV Serology                               | <input type="checkbox"/> Yes |
| Strongyloides serology                     | <input type="checkbox"/> Yes |

Provide stool sample collection pots and request forms x3 for patient to take home. Instruct patient to provide three separate samples over 2-3 days, ensuring the pot is filled halfway in order to complete all testing.

| Stool testing for:                                                        | Requested?                   |
|---------------------------------------------------------------------------|------------------------------|
| Bacterial culture (Campylobacter, Salmonella, Shigella, E. coli O:157) x3 | <input type="checkbox"/> Yes |
| Ova, Cysts and Parasites x3                                               | <input type="checkbox"/> Yes |
| C. difficile                                                              | <input type="checkbox"/> Yes |
| Resistant Gram negative organism screen                                   | <input type="checkbox"/> Yes |
| MRSA screen                                                               | <input type="checkbox"/> Yes |
| Helicobacter pylori stool antigen                                         | <input type="checkbox"/> Yes |
| E. histolytica PCR (not orderable on PCR)                                 |                              |

Arrange follow up visit for a minimum of 2-3 weeks time

Follow-up visit

| Serology results:    | Result                                                                  |
|----------------------|-------------------------------------------------------------------------|
| HIV antigen/antibody | <input type="checkbox"/> Detected <input type="checkbox"/> Not detected |

|                                            |                                                                         |
|--------------------------------------------|-------------------------------------------------------------------------|
| HTLV-1/HTLV-II antibodies                  | <input type="checkbox"/> Detected <input type="checkbox"/> Not detected |
| Hepatitis A IgG (add on IgM if positive)   | <input type="checkbox"/> Detected <input type="checkbox"/> Not detected |
| Hepatitis B surface antigen                | <input type="checkbox"/> Detected <input type="checkbox"/> Not detected |
| Hepatitis C IgG                            | <input type="checkbox"/> Detected <input type="checkbox"/> Not detected |
| Syphilis serology (T. pallidum antibodies) | <input type="checkbox"/> Detected <input type="checkbox"/> Not detected |
| CMV IgG (add on IgM if positive)           | <input type="checkbox"/> Detected <input type="checkbox"/> Not detected |
| EBV Serology                               | <input type="checkbox"/> Detected <input type="checkbox"/> Not detected |
| Strongyloides serology                     | <input type="checkbox"/> Detected <input type="checkbox"/> Not detected |

| Stool results:                                                            | Result                                                                  |
|---------------------------------------------------------------------------|-------------------------------------------------------------------------|
| Bacterial culture (Campylobacter, Salmonella, Shigella, E. coli O:157) x3 | <input type="checkbox"/> Detected <input type="checkbox"/> Not detected |
| Ova, Cysts and Parasites x3                                               | <input type="checkbox"/> Detected <input type="checkbox"/> Not detected |
| C. difficile                                                              | <input type="checkbox"/> Detected <input type="checkbox"/> Not detected |
| Resistant Gram negative organism screen                                   | <input type="checkbox"/> Detected <input type="checkbox"/> Not detected |
| MRSA screen                                                               | <input type="checkbox"/> Detected <input type="checkbox"/> Not detected |
| Helicobacter pylori stool antigen                                         | <input type="checkbox"/> Detected <input type="checkbox"/> Not detected |
| E. histolytica PCR (not orderable on PCR)                                 | <input type="checkbox"/> Detected <input type="checkbox"/> Not detected |

|                            |                                                          |
|----------------------------|----------------------------------------------------------|
| Is all testing complete?   | <input type="checkbox"/> Yes <input type="checkbox"/> No |
| Accept as donor?           | <input type="checkbox"/> Yes <input type="checkbox"/> No |
| Any referrals required     | <input type="checkbox"/> Yes <input type="checkbox"/> No |
| Details of referrals made: |                                                          |

Provide donor with stool collection kit x2 (contains collection instructions and copy of patient screening questionnaire 2). Explain requirement for stool to be fully processed within 6 hours of production.

The donor may provide multiple donations, but screening questionnaire 2 **MUST** be completed with **EACH** donation

If yes to any question, must undergo repeat full screening (however samples may be banked and quarantined for release after repeat testing).

If No to all questions samples may be released immediately and donor may continue to provide unlimited donations for 3 months after which time repeated screening will be required.



SPIRIT 2013 Checklist: Recommended items to address in a clinical trial protocol and related documents\*

| Section/item                      | Item No | Description                                                                                                                                                                                                                                                                                  |
|-----------------------------------|---------|----------------------------------------------------------------------------------------------------------------------------------------------------------------------------------------------------------------------------------------------------------------------------------------------|
| <b>Administrative information</b> |         |                                                                                                                                                                                                                                                                                              |
| Title                             | 1       | Descriptive title identifying the study design, population, interventions, and, if applicable, trial acronym (Page 1)                                                                                                                                                                        |
| Trial registration                | 2a      | Trial identifier and registry name. If not yet registered, name of intended registry (Page 1)                                                                                                                                                                                                |
|                                   | 2b      | All items from the World Health Organization Trial Registration Data Set                                                                                                                                                                                                                     |
| Protocol version                  | 3       | Date and version identifier (Page 1)                                                                                                                                                                                                                                                         |
| Funding                           | 4       | Sources and types of financial, material, and other support (Pages 9, 47)                                                                                                                                                                                                                    |
| Roles and responsibilities        | 5a      | Names, affiliations, and roles of protocol contributors (Pages 2-4)                                                                                                                                                                                                                          |
|                                   | 5b      | Name and contact information for the trial sponsor (Pages 3-4)                                                                                                                                                                                                                               |
|                                   | 5c      | Role of study sponsor and funders, if any, in study design; collection, management, analysis, and interpretation of data; writing of the report; and the decision to submit the report for publication, including whether they will have ultimate authority over any of these activities N/A |
|                                   | 5d      | Composition, roles, and responsibilities of the coordinating centre, steering committee, endpoint adjudication committee, data management team, and other individuals or groups overseeing the trial, if applicable (see Item 21a for data monitoring committee) (Page 47)                   |
| <b>Introduction</b>               |         |                                                                                                                                                                                                                                                                                              |
| Background and rationale          | 6a      | Description of research question and justification for undertaking the trial, including summary of relevant studies (published and unpublished) examining benefits and harms for each intervention (Pages 17-20)                                                                             |
|                                   | 6b      | Explanation for choice of comparators (Pages 17-20)                                                                                                                                                                                                                                          |
| Objectives                        | 7       | Specific objectives or hypotheses (Pages 21-22)                                                                                                                                                                                                                                              |

1  
2  
3  
4  
5  
6  
7  
8  
9  
10  
11  
12  
13  
14  
15  
16  
17  
18  
19  
20  
21  
22  
23  
24  
25  
26  
27  
28  
29  
30  
31  
32  
33  
34  
35  
36  
37  
38  
39  
40  
41  
42  
43  
44  
45  
46  
47  
48  
49  
50  
51  
52  
53  
54  
55  
56  
57  
58  
59  
60

Trial design 8 Description of trial design including type of trial (eg, parallel group, crossover, factorial, single group), allocation ratio, and framework (eg, superiority, equivalence, noninferiority, exploratory) (Pages 23-25)

### Methods: Participants, interventions, and outcomes

Study setting 9 Description of study settings (eg, community clinic, academic hospital) and list of countries where data will be collected. Reference to where list of study sites can be obtained (Page 23)

Eligibility criteria 10 Inclusion and exclusion criteria for participants. If applicable, eligibility criteria for study centres and individuals who will perform the interventions (eg, surgeons, psychotherapists) (Page 12, Page 29)

Interventions 11a Interventions for each group with sufficient detail to allow replication, including how and when they will be administered (Pages 32-36)

11b Criteria for discontinuing or modifying allocated interventions for a given trial participant (eg, drug dose change in response to harms, participant request, or improving/worsening disease) (Pages 15-16, 36-39)

11c Strategies to improve adherence to intervention protocols, and any procedures for monitoring adherence (eg, drug tablet return, laboratory tests) (N/A, single treatment administered by clinical trials team)

11d Relevant concomitant care and interventions that are permitted or prohibited during the trial (Pages 29-31)

Outcomes 12 Primary, secondary, and other outcomes, including the specific measurement variable (eg, systolic blood pressure), analysis metric (eg, change from baseline, final value, time to event), method of aggregation (eg, median, proportion), and time point for each outcome. Explanation of the clinical relevance of chosen efficacy and harm outcomes is strongly recommended (Pages 10-11, 21-22)

Participant timeline 13 Time schedule of enrolment, interventions (including any run-ins and washouts), assessments, and visits for participants. A schematic diagram is highly recommended (see Figure) (Pages 24-28)

Sample size 14 Estimated number of participants needed to achieve study objectives and how it was determined, including clinical and statistical assumptions supporting any sample size calculations (Pages 45-46)

Recruitment 15 Strategies for achieving adequate participant enrolment to reach target sample size (Pages 23, 25)

### Methods: Assignment of interventions (for controlled trials)

Allocation:

|    |                |     |                                                                           |
|----|----------------|-----|---------------------------------------------------------------------------|
| 1  |                |     |                                                                           |
| 2  | Sequence       | 16a | Method of generating the allocation sequence (eg, computer-               |
| 3  | generation     |     | generated random numbers), and list of any factors for stratification.    |
| 4  |                |     | To reduce predictability of a random sequence, details of any planned     |
| 5  |                |     | restriction (eg, blocking) should be provided in a separate document      |
| 6  |                |     | that is unavailable to those who enrol participants or assign             |
| 7  |                |     | interventions (Page 31)                                                   |
| 8  |                |     |                                                                           |
| 9  | Allocation     | 16b | Mechanism of implementing the allocation sequence (eg, central            |
| 10 | concealment    |     | telephone; sequentially numbered, opaque, sealed envelopes),              |
| 11 | mechanism      |     | describing any steps to conceal the sequence until interventions are      |
| 12 |                |     | assigned (Page 31, single blinded so only the patient is blinded)         |
| 13 |                |     |                                                                           |
| 14 | Implementation | 16c | Who will generate the allocation sequence, who will enrol participants,   |
| 15 |                |     | and who will assign participants to interventions (Trials Nurse, Chief    |
| 16 |                |     | Investigator or Clinical Research Fellow using randomisation              |
| 17 |                |     | software)                                                                 |
| 18 |                |     |                                                                           |
| 19 |                |     |                                                                           |
| 20 | Blinding       | 17a | Who will be blinded after assignment to interventions (eg, trial          |
| 21 | (masking)      |     | participants, care providers, outcome assessors, data analysts), and      |
| 22 |                |     | how (Patient is blinded to treatment allocation as is trial statistician, |
| 23 |                |     | database constructed so as not to reveal treatment allocation)            |
| 24 |                |     |                                                                           |
| 25 |                | 17b | If blinded, circumstances under which unblinding is permissible, and      |
| 26 |                |     | procedure for revealing a participant's allocated intervention during     |
| 27 |                |     | the trial (N/A)                                                           |
| 28 |                |     |                                                                           |
| 29 |                |     |                                                                           |

### Methods: Data collection, management, and analysis

|    |                 |     |                                                                          |
|----|-----------------|-----|--------------------------------------------------------------------------|
| 30 |                 |     |                                                                          |
| 31 | Data collection | 18a | Plans for assessment and collection of outcome, baseline, and other      |
| 32 | methods         |     | trial data, including any related processes to promote data quality (eg, |
| 33 |                 |     | duplicate measurements, training of assessors) and a description of      |
| 34 |                 |     | study instruments (eg, questionnaires, laboratory tests) along with      |
| 35 |                 |     | their reliability and validity, if known. Reference to where data        |
| 36 |                 |     | collection forms can be found, if not in the protocol                    |
| 37 |                 |     |                                                                          |
| 38 |                 |     |                                                                          |
| 39 |                 | 18b | Plans to promote participant retention and complete follow-up,           |
| 40 |                 |     | including list of any outcome data to be collected for participants who  |
| 41 |                 |     | discontinue or deviate from intervention protocols                       |
| 42 |                 |     |                                                                          |
| 43 | Data            | 19  | Plans for data entry, coding, security, and storage, including any       |
| 44 | management      |     | related processes to promote data quality (eg, double data entry;        |
| 45 |                 |     | range checks for data values). Reference to where details of data        |
| 46 |                 |     | management procedures can be found, if not in the protocol (Page 43)     |
| 47 |                 |     |                                                                          |
| 48 | Statistical     | 20a | Statistical methods for analysing primary and secondary outcomes.        |
| 49 | methods         |     | Reference to where other details of the statistical analysis plan can be |
| 50 |                 |     | found, if not in the protocol (Pages 45-46)                              |
| 51 |                 |     |                                                                          |
| 52 |                 | 20b | Methods for any additional analyses (eg, subgroup and adjusted           |
| 53 |                 |     | analyses) (To be confirmed)                                              |
| 54 |                 |     |                                                                          |
| 55 |                 |     |                                                                          |
| 56 |                 |     |                                                                          |
| 57 |                 |     |                                                                          |
| 58 |                 |     |                                                                          |
| 59 |                 |     |                                                                          |
| 60 |                 |     |                                                                          |

1  
2  
3  
4  
5  
6  
7  
8  
9  
10  
11  
12  
13  
14  
15  
16  
17  
18  
19  
20  
21  
22  
23  
24  
25  
26  
27  
28  
29  
30  
31  
32  
33  
34  
35  
36  
37  
38  
39  
40  
41  
42  
43  
44  
45  
46  
47  
48  
49  
50  
51  
52  
53  
54  
55  
56  
57  
58  
59  
60

20c Definition of analysis population relating to protocol non-adherence (eg, as randomised analysis), and any statistical methods to handle missing data (eg, multiple imputation) (Pages 45-46)

### Methods: Monitoring

Data monitoring 21a Composition of data monitoring committee (DMC); summary of its role and reporting structure; statement of whether it is independent from the sponsor and competing interests; and reference to where further details about its charter can be found, if not in the protocol. Alternatively, an explanation of why a DMC is not needed (Page 47)

21b Description of any interim analyses and stopping guidelines, including who will have access to these interim results and make the final decision to terminate the trial (Pages 39-40, 47)

Harms 22 Plans for collecting, assessing, reporting, and managing solicited and spontaneously reported adverse events and other unintended effects of trial interventions or trial conduct (Pages 36-38)

Auditing 23 Frequency and procedures for auditing trial conduct, if any, and whether the process will be independent from investigators and the sponsor (Pages 14, 43-44)

### Ethics and dissemination

Research ethics approval 24 Plans for seeking research ethics committee/institutional review board (REC/IRB) approval (Page 14) Research Ethics approval was given by the London South East Research Ethics committee (ref 17/LO/2081)

Protocol amendments 25 Plans for communicating important protocol modifications (eg, changes to eligibility criteria, outcomes, analyses) to relevant parties (eg, investigators, REC/IRBs, trial participants, trial registries, journals, regulators) Direct communication with REC and involvement of DMC and TSC as required

Consent or assent 26a Who will obtain informed consent or assent from potential trial participants or authorised surrogates, and how (see Item 32) (Pages 14-16)

26b Additional consent provisions for collection and use of participant data and biological specimens in ancillary studies, if applicable (N/A)

Confidentiality 27 How personal information about potential and enrolled participants will be collected, shared, and maintained in order to protect confidentiality before, during, and after the trial (Pages 15, 23, 31, 43, 44)

Declaration of interests 28 Financial and other competing interests for principal investigators for the overall trial and each study site N/A

|    |                               |     |                                                                                                                                                                                                                                                                                               |
|----|-------------------------------|-----|-----------------------------------------------------------------------------------------------------------------------------------------------------------------------------------------------------------------------------------------------------------------------------------------------|
| 1  | Access to data                | 29  | Statement of who will have access to the final trial dataset, and disclosure of contractual agreements that limit such access for investigators (Page 43)                                                                                                                                     |
| 2  |                               |     |                                                                                                                                                                                                                                                                                               |
| 3  |                               |     |                                                                                                                                                                                                                                                                                               |
| 4  |                               |     |                                                                                                                                                                                                                                                                                               |
| 5  | Ancillary and post-trial care | 30  | Provisions, if any, for ancillary and post-trial care, and for compensation to those who suffer harm from trial participation (Information in PIS)                                                                                                                                            |
| 6  |                               |     |                                                                                                                                                                                                                                                                                               |
| 7  |                               |     |                                                                                                                                                                                                                                                                                               |
| 8  |                               |     |                                                                                                                                                                                                                                                                                               |
| 9  |                               |     |                                                                                                                                                                                                                                                                                               |
| 10 | Dissemination policy          | 31a | Plans for investigators and sponsor to communicate trial results to participants, healthcare professionals, the public, and other relevant groups (eg, via publication, reporting in results databases, or other data sharing arrangements), including any publication restrictions (Page 47) |
| 11 |                               |     |                                                                                                                                                                                                                                                                                               |
| 12 |                               |     |                                                                                                                                                                                                                                                                                               |
| 13 |                               |     |                                                                                                                                                                                                                                                                                               |
| 14 |                               |     |                                                                                                                                                                                                                                                                                               |
| 15 |                               |     |                                                                                                                                                                                                                                                                                               |
| 16 |                               | 31b | Authorship eligibility guidelines and any intended use of professional writers N/A                                                                                                                                                                                                            |
| 17 |                               |     |                                                                                                                                                                                                                                                                                               |
| 18 |                               |     |                                                                                                                                                                                                                                                                                               |
| 19 |                               | 31c | Plans, if any, for granting public access to the full protocol, participant-level dataset, and statistical code (Page 47)                                                                                                                                                                     |
| 20 |                               |     |                                                                                                                                                                                                                                                                                               |
| 21 |                               |     |                                                                                                                                                                                                                                                                                               |
| 22 |                               |     |                                                                                                                                                                                                                                                                                               |
| 23 | <b>Appendices</b>             |     |                                                                                                                                                                                                                                                                                               |
| 24 | Informed consent materials    | 32  | Model consent form and other related documentation given to participants and authorised surrogates                                                                                                                                                                                            |
| 25 |                               |     |                                                                                                                                                                                                                                                                                               |
| 26 |                               |     |                                                                                                                                                                                                                                                                                               |
| 27 | Biological specimens          | 33  | Plans for collection, laboratory evaluation, and storage of biological specimens for genetic or molecular analysis in the current trial and for future use in ancillary studies, if applicable                                                                                                |
| 28 |                               |     |                                                                                                                                                                                                                                                                                               |
| 29 |                               |     |                                                                                                                                                                                                                                                                                               |
| 30 |                               |     |                                                                                                                                                                                                                                                                                               |

---

\*It is strongly recommended that this checklist be read in conjunction with the SPIRIT 2013 Explanation & Elaboration for important clarification on the items. Amendments to the protocol should be tracked and dated. The SPIRIT checklist is copyrighted by the SPIRIT Group under the Creative Commons "[Attribution-NonCommercial-NoDerivs 3.0 Unported](https://creativecommons.org/licenses/by-nc-nd/3.0/)" license.
