# Supplementary material for: PROFIT, a PROspective, randomised placebo controlled feasibility trial of Faecal mIcrobiota Transplantation in cirrhosis: study protocol for a single-blinded trial
Source: BMJ Open. 2019 Feb 15;9(2):e023518. doi: 10.1136/bmjopen-2018-023518 (PMC6398649; doi:10.1136/bmjopen-2018-023518)
Supplement: Supplementary data [file bmjopen-2018-023518supp002.pdf]

**Faecal Microbiota Transplant (FMT) for recurrent or refractory *Clostridium difficile* Infection (CDI)**

**Donor screening questionnaire – Part 1**

**Name:**

**DOB:**

**Hospital number:**

**NHS number:**

**Contact details (preferably mobile):**

**Date of assessment:**

**Name / position of assessor:**

|                                                                        |                                                                                                                                                                                                                                                                                                                                                                                                                                                                                                                                                                                                                                                                                                                                                                                                                                                                                                          |
|------------------------------------------------------------------------|----------------------------------------------------------------------------------------------------------------------------------------------------------------------------------------------------------------------------------------------------------------------------------------------------------------------------------------------------------------------------------------------------------------------------------------------------------------------------------------------------------------------------------------------------------------------------------------------------------------------------------------------------------------------------------------------------------------------------------------------------------------------------------------------------------------------------------------------------------------------------------------------------------|
| Donor type                                                             | <input type="checkbox"/> Named donor<br><input type="checkbox"/> Anonymous donor                                                                                                                                                                                                                                                                                                                                                                                                                                                                                                                                                                                                                                                                                                                                                                                                                         |
| If Named donor, name and hospital number of recipient                  |                                                                                                                                                                                                                                                                                                                                                                                                                                                                                                                                                                                                                                                                                                                                                                                                                                                                                                          |
| If Named donor, relationship to recipient                              |                                                                                                                                                                                                                                                                                                                                                                                                                                                                                                                                                                                                                                                                                                                                                                                                                                                                                                          |
| If Named donor, does the recipient normally live in the same dwelling? | <input type="checkbox"/> Yes <input type="checkbox"/> No                                                                                                                                                                                                                                                                                                                                                                                                                                                                                                                                                                                                                                                                                                                                                                                                                                                 |
| Age                                                                    | Exclude if <18 or >60                                                                                                                                                                                                                                                                                                                                                                                                                                                                                                                                                                                                                                                                                                                                                                                                                                                                                    |
| Gender                                                                 | <input type="checkbox"/> Male <input type="checkbox"/> Female                                                                                                                                                                                                                                                                                                                                                                                                                                                                                                                                                                                                                                                                                                                                                                                                                                            |
| Ethnicity                                                              | <input type="checkbox"/> White - White British<br><input type="checkbox"/> White - White Irish<br><input type="checkbox"/> White - Other<br><input type="checkbox"/> Mixed race – White and Black Caribbean<br><input type="checkbox"/> Mixed race – White and Black African<br><input type="checkbox"/> Mixed race – White and Asian<br><input type="checkbox"/> Mixed race – Other<br><input type="checkbox"/> Asian or Asian British – Indian<br><input type="checkbox"/> Asian or Asian British – Bangladeshi<br><input type="checkbox"/> Asian or Asian British – Pakistani<br><input type="checkbox"/> Asian or Asian British – Other<br><input type="checkbox"/> Black or Black British – Caribbean<br><input type="checkbox"/> Black or Black British – African<br><input type="checkbox"/> Black or Black British – Other<br><input type="checkbox"/> Chinese<br><input type="checkbox"/> Other |
| Height cm                                                              |                                                                                                                                                                                                                                                                                                                                                                                                                                                                                                                                                                                                                                                                                                                                                                                                                                                                                                          |

|                                                                       |                                                                                                                                                                                                                                                                                                                                                                                                                                                                           |
|-----------------------------------------------------------------------|---------------------------------------------------------------------------------------------------------------------------------------------------------------------------------------------------------------------------------------------------------------------------------------------------------------------------------------------------------------------------------------------------------------------------------------------------------------------------|
| Weight kg                                                             |                                                                                                                                                                                                                                                                                                                                                                                                                                                                           |
| BMI                                                                   | Exclude if BMI>25                                                                                                                                                                                                                                                                                                                                                                                                                                                         |
| Has your weight changed by more than 5lb / 2kg in the past 6 months?  | <input type="checkbox"/> Yes <input type="checkbox"/> No<br>Detail:                                                                                                                                                                                                                                                                                                                                                                                                       |
| Describe your diet (as many as apply):                                | <input type="checkbox"/> Omnivore<br><input type="checkbox"/> Vegetarian<br><input type="checkbox"/> Vegan<br><input type="checkbox"/> Kosher<br><input type="checkbox"/> Halal<br><input type="checkbox"/> Raw food only<br><input type="checkbox"/> Pescatarian<br><input type="checkbox"/> No red meat<br><input type="checkbox"/> Low carbohydrate<br><input type="checkbox"/> Lactose free<br><input type="checkbox"/> Gluten free<br><input type="checkbox"/> Other |
| How many portions of fruit and vegetables do you consume per day?     | <input type="checkbox"/> one or less<br><input type="checkbox"/> two to three<br><input type="checkbox"/> three to four<br><input type="checkbox"/> five to six<br><input type="checkbox"/> seven or more                                                                                                                                                                                                                                                                 |
| How many servings of cow, sheep or goats milk do you consume per day? | <input type="checkbox"/> one or less<br><input type="checkbox"/> two to three<br><input type="checkbox"/> three to four<br><input type="checkbox"/> five to six<br><input type="checkbox"/> seven or more                                                                                                                                                                                                                                                                 |
| Alcohol – units/week                                                  |                                                                                                                                                                                                                                                                                                                                                                                                                                                                           |
| Smoking/day                                                           |                                                                                                                                                                                                                                                                                                                                                                                                                                                                           |
| Normal bowel habit – average Bristol Stool Consistency                | <input type="checkbox"/> 1<br><input type="checkbox"/> 2<br><input type="checkbox"/> 3<br><input type="checkbox"/> 4<br><input type="checkbox"/> 5<br><input type="checkbox"/> 6<br><input type="checkbox"/> 7<br>Exclude if 6 or 7                                                                                                                                                                                                                                       |
| Normal bowel habit – average frequency                                | <input type="checkbox"/> >2/day<br><input type="checkbox"/> once to twice daily<br><input type="checkbox"/> once / 2 days<br><input type="checkbox"/> <once / 2 days<br>Exclude if active diarrhoea (>3 UBM/day for at least 2 consecutive days)                                                                                                                                                                                                                          |

|                                                                                                                                                                                            |                                                                                                                                  |
|--------------------------------------------------------------------------------------------------------------------------------------------------------------------------------------------|----------------------------------------------------------------------------------------------------------------------------------|
| During the past 7 days how many days were you physically active for a cumulative total of >60 mins/day?                                                                                    |                                                                                                                                  |
| Have you ever been rejected as a blood donor/told not to donate?<br>If yes, why?                                                                                                           | <input type="checkbox"/> Yes <input type="checkbox"/> No<br><br>Exclude if YES                                                   |
| What is your country of birth?                                                                                                                                                             |                                                                                                                                  |
| Have you ever resided in another country (other than UK) for >5 years?<br>If so which countries and when?                                                                                  | <input type="checkbox"/> Yes <input type="checkbox"/> No                                                                         |
| Do you currently have a profession that is associated with an increased risk of blood-borne transmissible diseases (e.g. daily contact with patients/inmates)?<br>If yes, what profession? | <input type="checkbox"/> Yes <input type="checkbox"/> No<br><br>Exclude if health/social care worker with direct patient contact |
| Have you ever had a needle-stick or injury from a blood contaminated object from someone else? If yes, when and how was this follow up?                                                    | <input type="checkbox"/> Yes <input type="checkbox"/> No                                                                         |
| Have you ever injected yourself or been injected with illegal or non-prescribed drugs including body building drugs or cosmetics (even if this was only once or a long time ago?)          | <input type="checkbox"/> Yes <input type="checkbox"/> No<br><br>Exclude if YES                                                   |
| Have you ever had a tattoo?<br>If yes, when and in which country was it performed?                                                                                                         | <input type="checkbox"/> Yes <input type="checkbox"/> No<br><br>Exclude if within past 4 months                                  |
| Have you ever had a piercing?<br>If yes, when and in which country was it performed?                                                                                                       | <input type="checkbox"/> Yes <input type="checkbox"/> No<br><br>Exclude if within past 4 months                                  |
| Have you ever had acupuncture?<br>If yes, when and in which country was it performed?                                                                                                      | <input type="checkbox"/> Yes <input type="checkbox"/> No<br><br>Exclude if within past 4 months                                  |
| Have you ever had an operation or undergone clinical treatment in a hospital with poor hygienic conditions?<br>If yes, when and in which country was it performed?                         | <input type="checkbox"/> Yes <input type="checkbox"/> No                                                                         |
| Have you ever had a rare infectious disease (e.g. tuberculosis, trypanosomiasis)?<br>If yes, when and which disease?                                                                       | <input type="checkbox"/> Yes <input type="checkbox"/> No                                                                         |
| Have you ever been vaccinated against Hepatitis A or B?<br>If yes, which?                                                                                                                  | <input type="checkbox"/> Yes <input type="checkbox"/> No                                                                         |

|                                                                                                                                                                                                                                                                                                                                                                                                                            |                                                                                                                                                                                                                                                                                                                                                                                                                                                                                                                                                                                                                                                                                                                                                                                                                                                                                                                                                                                                  |
|----------------------------------------------------------------------------------------------------------------------------------------------------------------------------------------------------------------------------------------------------------------------------------------------------------------------------------------------------------------------------------------------------------------------------|--------------------------------------------------------------------------------------------------------------------------------------------------------------------------------------------------------------------------------------------------------------------------------------------------------------------------------------------------------------------------------------------------------------------------------------------------------------------------------------------------------------------------------------------------------------------------------------------------------------------------------------------------------------------------------------------------------------------------------------------------------------------------------------------------------------------------------------------------------------------------------------------------------------------------------------------------------------------------------------------------|
| Have you received a live vaccine in the past 6 months?                                                                                                                                                                                                                                                                                                                                                                     | <input type="checkbox"/> Yes <input type="checkbox"/> No                                                                                                                                                                                                                                                                                                                                                                                                                                                                                                                                                                                                                                                                                                                                                                                                                                                                                                                                         |
| In the last 12 months have you had sex with anyone who is HIV positive?                                                                                                                                                                                                                                                                                                                                                    | <input type="checkbox"/> Yes <input type="checkbox"/> No<br>Exclude if Yes                                                                                                                                                                                                                                                                                                                                                                                                                                                                                                                                                                                                                                                                                                                                                                                                                                                                                                                       |
| In the last 12 months have you had sex with anyone with hepatitis B, hepatitis C or HTLV?                                                                                                                                                                                                                                                                                                                                  | <input type="checkbox"/> Yes <input type="checkbox"/> No<br>Exclude if Yes                                                                                                                                                                                                                                                                                                                                                                                                                                                                                                                                                                                                                                                                                                                                                                                                                                                                                                                       |
| In the last 12 months have you had sex with anyone who has ever been given money or drugs for sex?                                                                                                                                                                                                                                                                                                                         | <input type="checkbox"/> Yes <input type="checkbox"/> No<br>Exclude if Yes                                                                                                                                                                                                                                                                                                                                                                                                                                                                                                                                                                                                                                                                                                                                                                                                                                                                                                                       |
| In the last 12 months have you had sex with anyone who has ever injected drugs?                                                                                                                                                                                                                                                                                                                                            | <input type="checkbox"/> Yes <input type="checkbox"/> No<br>Exclude if Yes                                                                                                                                                                                                                                                                                                                                                                                                                                                                                                                                                                                                                                                                                                                                                                                                                                                                                                                       |
| In the last 12 months have you had sex with anyone who may ever have had sex in parts of the world where HIV/AIDS is very common (this includes most countries in Africa)?                                                                                                                                                                                                                                                 | <input type="checkbox"/> Yes <input type="checkbox"/> No<br>Exclude if Yes                                                                                                                                                                                                                                                                                                                                                                                                                                                                                                                                                                                                                                                                                                                                                                                                                                                                                                                       |
| <b>Male donors ONLY:</b><br>In the last 12 months have you ever had oral or anal sex with a man, with or without a condom?                                                                                                                                                                                                                                                                                                 | <input type="checkbox"/> Yes <input type="checkbox"/> No<br>Exclude if Yes                                                                                                                                                                                                                                                                                                                                                                                                                                                                                                                                                                                                                                                                                                                                                                                                                                                                                                                       |
| <b>Female donors ONLY:</b><br>In the last 12 months have you had sex with a man who has ever had oral or anal sex with another man, with or without a condom?                                                                                                                                                                                                                                                              | <input type="checkbox"/> Yes <input type="checkbox"/> No<br>Exclude if Yes                                                                                                                                                                                                                                                                                                                                                                                                                                                                                                                                                                                                                                                                                                                                                                                                                                                                                                                       |
| Have you ever been treated for an intestinal infection?<br>If yes, which one and when?                                                                                                                                                                                                                                                                                                                                     | <input type="checkbox"/> Yes <input type="checkbox"/> No                                                                                                                                                                                                                                                                                                                                                                                                                                                                                                                                                                                                                                                                                                                                                                                                                                                                                                                                         |
| Do you have any intestinal conditions:<br>Barrett's Oesophagus<br>Coeliac disease<br>Diverticular disease<br>Dyspepsia<br>Gastric ulcer<br>Gastro-oesophageal reflux disease<br>Hepatitis<br>H. pylori infection<br>Crohns disease<br>Ulcerative colitis<br>Other inflammatory bowel diseases<br>Irritable Bowel Syndrome<br>Lactose intolerance<br>Liver disease<br>Pancreatitis<br>Gastrointestinal malignancy or polyps | <input type="checkbox"/> Yes <input type="checkbox"/> No<br><input type="checkbox"/> Yes <input type="checkbox"/> No<br> |
|                                                                                                                                                                                                                                                                                                                                                                                                                            | Exclude if Inflammatory Bowel Disease, Irritable Bowel Syndrome, GI malignancy, Hepatitis A, B, C or E                                                                                                                                                                                                                                                                                                                                                                                                                                                                                                                                                                                                                                                                                                                                                                                                                                                                                           |

|                                                                                                                                                                                                                                                                                                                                                                                                                                                                                                                                                           |                                                                                         |
|-----------------------------------------------------------------------------------------------------------------------------------------------------------------------------------------------------------------------------------------------------------------------------------------------------------------------------------------------------------------------------------------------------------------------------------------------------------------------------------------------------------------------------------------------------------|-----------------------------------------------------------------------------------------|
| Have you used any antibiotics in the last 3 months?                                                                                                                                                                                                                                                                                                                                                                                                                                                                                                       | <input type="checkbox"/> Yes <input type="checkbox"/> No<br>Exclude if Yes              |
| Have you had a fever in the last 2 weeks?                                                                                                                                                                                                                                                                                                                                                                                                                                                                                                                 | <input type="checkbox"/> Yes <input type="checkbox"/> No<br>Exclude if Yes              |
| Have you ever been incarcerated in prison?                                                                                                                                                                                                                                                                                                                                                                                                                                                                                                                | <input type="checkbox"/> Yes <input type="checkbox"/> No<br>Exclude if in past 4 months |
| Have you ever been immunosuppressed (e.g. during treatment for cancer, or for a solid organ transplant)?<br>If yes, when and why?                                                                                                                                                                                                                                                                                                                                                                                                                         | <input type="checkbox"/> Yes <input type="checkbox"/> No                                |
| Have you ever had major gastrointestinal surgery?<br>If yes, when and why?                                                                                                                                                                                                                                                                                                                                                                                                                                                                                | <input type="checkbox"/> Yes <input type="checkbox"/> No<br>Relative exclusion criteria |
| Have you ever suffered from metabolic syndrome?                                                                                                                                                                                                                                                                                                                                                                                                                                                                                                           | <input type="checkbox"/> Yes <input type="checkbox"/> No<br>Relative exclusion criteria |
| Have you ever suffered from any autoimmune condition (e.g. rheumatoid), asthma or eczema?<br>If yes, which, and do you take any treatment?                                                                                                                                                                                                                                                                                                                                                                                                                | <input type="checkbox"/> Yes <input type="checkbox"/> No<br>Relative exclusion criteria |
| Have you ever had any chronic pain or fatigue syndromes?<br>If yes, which?                                                                                                                                                                                                                                                                                                                                                                                                                                                                                | <input type="checkbox"/> Yes <input type="checkbox"/> No<br>Relative exclusion criteria |
| Have you any history of CJD or other prion disease in your family? If yes, please specify<br>Patients should be considered to be at risk from genetic forms of CJD if they have or have had <ol style="list-style-type: none"> <li>1. Genetic testing, which has indicated they are at significant risk of developing CJD or other prion disease</li> <li>2. A blood relative known to have a genetic mutation indicative of genetic CJD or other prion disease</li> <li>3. Two or more blood relatives affected by CJD or other prion disease</li> </ol> | <input type="checkbox"/> Yes <input type="checkbox"/> No                                |
| Have you ever received growth hormone or gonadotrophic treatment? If yes, please specify;<br>i) Whether the hormone was derived from human pituitary glands<br>ii) The year of the treatment<br>iii) Whether the treatment was received in the UK or in another country                                                                                                                                                                                                                                                                                   | <input type="checkbox"/> Yes <input type="checkbox"/> No                                |

|                                                                                                                                                                                                                                                                                                                                                                                                                                                                                       |                                                          |
|---------------------------------------------------------------------------------------------------------------------------------------------------------------------------------------------------------------------------------------------------------------------------------------------------------------------------------------------------------------------------------------------------------------------------------------------------------------------------------------|----------------------------------------------------------|
| <p>Recipients of hormone derived from human pituitary glands eg growth hormone or gonadotrophin have been identified as potentially at risk of CJD. In the UK, the use of human growth hormone was stopped in 1985 but human-derived products may have been continued to be used in other countries. In the UK, the use of human-derived gonadotrophin was discontinued in 1973 but may have been continued in other countries after this time.</p>                                   |                                                          |
| <p>Have you ever had surgery on your brain or spinal cord?</p> <p>People who underwent intradural neurosurgical or spinal procedures before August 1992 may have received a graft of human-derived dura mater and should be treated as at increased risk, unless evidence can be provided that human-derived dura mater was not used. Patients who received a graft of human-derived dura mater between 1980 and August 1992 are at increased risk of both sporadic CJD and vCJD.</p> | <input type="checkbox"/> Yes <input type="checkbox"/> No |
| <p>Are you normally resident in the UK?</p> <p>If No state country of usual residence</p>                                                                                                                                                                                                                                                                                                                                                                                             | <input type="checkbox"/> Yes <input type="checkbox"/> No |
| <p>Which countries have you visited in the last 12 months and what was the duration of stay?</p>                                                                                                                                                                                                                                                                                                                                                                                      |                                                          |
| <p>In the past 12 months have you been admitted to a hospital in a country other than the UK?</p> <p>If yes state when and which countries</p>                                                                                                                                                                                                                                                                                                                                        | <input type="checkbox"/> Yes <input type="checkbox"/> No |
| <p>In the past 12 months have you been admitted to another hospital in London or Manchester?</p> <p>If yes state when and which hospitals</p>                                                                                                                                                                                                                                                                                                                                         | <input type="checkbox"/> Yes <input type="checkbox"/> No |
| <p>List all current medications:</p>                                                                                                                                                                                                                                                                                                                                                                                                                                                  |                                                          |

|  |                                                      |
|--|------------------------------------------------------|
|  | Exclude if any regular prescribed drugs (except OCP) |
|--|------------------------------------------------------|

|                                                                                   |                                                          |
|-----------------------------------------------------------------------------------|----------------------------------------------------------|
| Is patient eligible to donate?                                                    | <input type="checkbox"/> Yes <input type="checkbox"/> No |
| If No document reasons:                                                           |                                                          |
| If Yes proceed to screening tests<br>Ensure consent for testing documented        |                                                          |
| Sign and date (health care practitioner) to indicate patient has provided consent |                                                          |

| Obtain serology for:                       | Requested?                   |
|--------------------------------------------|------------------------------|
| HIV antigen/antibody                       | <input type="checkbox"/> Yes |
| HTLV-1/HTLV-II antibodies                  | <input type="checkbox"/> Yes |
| Hepatitis A IgG (add on IgM if positive)   | <input type="checkbox"/> Yes |
| Hepatitis B surface antigen                | <input type="checkbox"/> Yes |
| Hepatitis C IgG                            | <input type="checkbox"/> Yes |
| Syphilis serology (T. pallidum antibodies) | <input type="checkbox"/> Yes |
| CMV IgG (add on IgM if positive)           | <input type="checkbox"/> Yes |
| EBV Serology                               | <input type="checkbox"/> Yes |
| Strongyloides serology                     | <input type="checkbox"/> Yes |

Provide stool sample collection pots and request forms x3 for patient to take home. Instruct patient to provide three separate samples over 2-3 days, ensuring the pot is filled halfway in order to complete all testing.

| Stool testing for:                                                        | Requested?                   |
|---------------------------------------------------------------------------|------------------------------|
| Bacterial culture (Campylobacter, Salmonella, Shigella, E. coli O:157) x3 | <input type="checkbox"/> Yes |
| Ova, Cysts and Parasites x3                                               | <input type="checkbox"/> Yes |
| C. difficile                                                              | <input type="checkbox"/> Yes |
| Resistant Gram negative organism screen                                   | <input type="checkbox"/> Yes |
| MRSA screen                                                               | <input type="checkbox"/> Yes |
| Helicobacter pylori stool antigen                                         | <input type="checkbox"/> Yes |
| E. histolytica PCR (not orderable on PCR)                                 |                              |

Arrange follow up visit for a minimum of 2-3 weeks time

Follow-up visit

| Serology results:    | Result                                                                  |
|----------------------|-------------------------------------------------------------------------|
| HIV antigen/antibody | <input type="checkbox"/> Detected <input type="checkbox"/> Not detected |

|                                            |                                                                         |
|--------------------------------------------|-------------------------------------------------------------------------|
| HTLV-1/HTLV-II antibodies                  | <input type="checkbox"/> Detected <input type="checkbox"/> Not detected |
| Hepatitis A IgG (add on IgM if positive)   | <input type="checkbox"/> Detected <input type="checkbox"/> Not detected |
| Hepatitis B surface antigen                | <input type="checkbox"/> Detected <input type="checkbox"/> Not detected |
| Hepatitis C IgG                            | <input type="checkbox"/> Detected <input type="checkbox"/> Not detected |
| Syphilis serology (T. pallidum antibodies) | <input type="checkbox"/> Detected <input type="checkbox"/> Not detected |
| CMV IgG (add on IgM if positive)           | <input type="checkbox"/> Detected <input type="checkbox"/> Not detected |
| EBV Serology                               | <input type="checkbox"/> Detected <input type="checkbox"/> Not detected |
| Strongyloides serology                     | <input type="checkbox"/> Detected <input type="checkbox"/> Not detected |

|                                                                           |                                                                         |
|---------------------------------------------------------------------------|-------------------------------------------------------------------------|
| Stool results:                                                            | Result                                                                  |
| Bacterial culture (Campylobacter, Salmonella, Shigella, E. coli O:157) x3 | <input type="checkbox"/> Detected <input type="checkbox"/> Not detected |
| Ova, Cysts and Parasites x3                                               | <input type="checkbox"/> Detected <input type="checkbox"/> Not detected |
| C. difficile                                                              | <input type="checkbox"/> Detected <input type="checkbox"/> Not detected |
| Resistant Gram negative organism screen                                   | <input type="checkbox"/> Detected <input type="checkbox"/> Not detected |
| MRSA screen                                                               | <input type="checkbox"/> Detected <input type="checkbox"/> Not detected |
| Helicobacter pylori stool antigen                                         | <input type="checkbox"/> Detected <input type="checkbox"/> Not detected |
| E. histolytica PCR (not orderable on PCR)                                 | <input type="checkbox"/> Detected <input type="checkbox"/> Not detected |

|                            |                                                          |
|----------------------------|----------------------------------------------------------|
| Is all testing complete?   | <input type="checkbox"/> Yes <input type="checkbox"/> No |
| Accept as donor?           | <input type="checkbox"/> Yes <input type="checkbox"/> No |
| Any referrals required     | <input type="checkbox"/> Yes <input type="checkbox"/> No |
| Details of referrals made: |                                                          |

Provide donor with stool collection kit x2 (contains collection instructions and copy of patient screening questionnaire 2). Explain requirement for stool to be fully processed within 6 hours of production.

The donor may provide multiple donations, but screening questionnaire 2 **MUST** be completed with **EACH** donation

If yes to any question, must undergo repeat full screening (however samples may be banked and quarantined for release after repeat testing).

If No to all questions samples may be released immediately and donor may continue to provide unlimited donations for 3 months after which time repeated screening will be required.
